# Supplementary material for: Effect of size, charge, and spin state on Hückel and Baird aromaticity in [ N ]annulenes
Source: Royal Society of Chemistry journal article supplement (doi:10.1039/d4sc08225g), 2025-01-01
Supplement: d4sc08225g1.pdf [file d4sc08225g1.pdf]

## Effect of size and charge on Hückel and Baird aromaticity in [N]annulenes

Louis Van Nyvel<sup>a</sup>, Mercedes Alonso<sup>a,\*</sup> and Miquel Solà<sup>b,\*</sup>

<sup>a</sup> Department of General Chemistry (ALGC), Vrije Universiteit Brussel (VUB), Pleinlaan 2, 1050 Brussels, Belgium. e-mail: mercedes.alonso.giner@vub.be

<sup>b</sup> Institut de Química Computacional i Catàlisi (IQCC) and Departament de Química, Universitat de Girona, C/ Maria Aurèlia Capmany, 69, 17003-Girona, Catalonia, Spain. e-mail: miquel.sola@udg.edu

### TABLE OF CONTENTS

|                                                                           |     |
|---------------------------------------------------------------------------|-----|
| Aromaticity indices                                                       | S2  |
| Annulene structures                                                       | S5  |
| Influence of the level of theory on the evaluation of aromaticity indices | S10 |
| Correlation plots between the B3LYP and CAM-B3LYP indices of aromaticity  | S33 |
| B3LYP aromaticity results                                                 | S35 |
| Spin density                                                              | S37 |
| EDDB <sub>norm</sub> results                                              | S39 |
| EDDB visualisation                                                        | S41 |
| Aromatic stabilisation energy results of the [N]annulenes                 | S43 |
| GIMIC results                                                             | S64 |
| Correlation Analysis                                                      | S76 |
| References                                                                | S79 |

## Aromaticity Indices

### Structural indices

The harmonic oscillator model of aromaticity (HOMA) was introduced by Kruszewski and Krygowski.<sup>1</sup> In their Equation (1), they utilise a variety of different parameters. One is the empirical normalisation constant  $\alpha_j$ , which ensures that HOMA values fall between -1 and 1. An  $\alpha_j$  value of 257.7 is typical for a C-C bond.<sup>2</sup> In addition, an optimal bond distance  $r_{opt}$  is included. It represents the distance for which a minimum amount of energy is needed to transform a bond into either a single or double bond.<sup>4</sup> However, the use of reference values precludes the applicability of this structural index to all types of bonds. Finally, it is necessary to consider the number of bonds  $n$  within the ring, as well as the distance  $r_{A_i A_{i+1}}$  between two consecutive atoms,  $A_i$  and  $A_{i+1}$ .<sup>2,3</sup> In essence, HOMA will ultimately demonstrate the difference between this bond distance and the previously cited reference values.<sup>4</sup> In general, values of approximately 1, 0, and -1 are indicative of aromatic, nonaromatic, and antiaromatic structures, respectively.<sup>2</sup>

$$\text{HOMA} = 1 - \frac{1}{n} \sum_{i=1}^n \alpha_j (r_{opt} - r_{A_i A_{i+1}})^2 \quad (1)$$

The bond-length alternation (BLA) is an alternative structural index. Using Equation 2, the average bond length alternation between two consecutive bonds can be determined.<sup>5,6</sup> Additionally, the total number of bonds  $n$  within the ring must be considered. The version of BLA used in this work is the revised version, which has been optimised for use with rings that possess an odd number of atoms.<sup>5,7</sup> The presence of large BLA values is indicative of antiaromatic structures, whereas values close to zero are suggestive of aromatic and potential nonaromatic structures.<sup>6</sup>

$$\text{BLA} = \frac{1}{2n} \sum_{i=1}^n |r_{A_i A_{i+1}} - r_{A_{i+1} A_{i+2}}| \quad (2)$$

### Electronic indices

Most of the electronic indices employ the electron delocalisation index (DI),  $\delta(A, B)$ , to predict aromaticity. This index was originally proposed by Bader *et al.*,<sup>8</sup> with subsequent refinements made by Poater and colleagues.<sup>9</sup> The DI can be used to determine the bond order of a given bond and represents the number of electrons shared by two atoms.<sup>2,4</sup> Typically, an aromatic bond has a DI value around 1.5, with single, double, and triple bonds exhibiting values around 1, 2, and 3 respectively.

$$\delta(A, B) = -2 \int_{\Omega_A} \int_{\Omega_B} \rho_{XC}(r_1, r_2) dr_1 dr_2 = -2 \text{cov}(N_A, N_B) \quad (3)$$

In order to ascertain  $\delta(A, B)$ , the double integral of the negative exchange-correlation density  $\rho_{XC}(r_1, r_2)$  over the atomic basins  $\Omega_A$  and  $\Omega_B$  must be determined (Equation 3).<sup>10</sup> The exchange-correlation density is defined as the difference between the uncorrelated ( $\rho(r_1)\rho(r_2)$ ) and correlated ( $\rho(r_1, r_2)$ ) parts of the pair density.<sup>10</sup> The basins are obtained by partitioning the molecule into different atomic basins based on the Quantum Theory of Atoms-in-Molecules (QTAIM) approach.<sup>10,11</sup>

Matito and colleagues devised the aromatic fluctuation index (FLU), which is the electronic equivalent of HOMA.<sup>2</sup> Instead of bond distances, the electron delocalisation  $\delta(A_i A_{i-1})$  and valence  $\delta(A_i)$  of each atom in the ring is employed.<sup>2</sup> Once again, a reference value ( $\delta_{ref}(A_i A_{i-1})$ ) is used, which limits its applicability. In the case of a C-C bond, benzene is taken as the reference.<sup>6</sup> Furthermore, the  $\alpha$  term was incorporated into Equation 4 to guarantee that the initial term is always greater than 1.<sup>2</sup> To enforce this, the valence, which corresponds to the number of valence electrons of the atom, of two consecutive atoms is considered, as illustrated in Equation 5.<sup>2</sup> Aromatic structures exhibit FLU values close to zero, whereas large values indicate non- and antiaromatic structures.<sup>2,4</sup>

$$\text{FLU} = \frac{1}{n} \sum_{i=1}^n \left[ \left( \frac{\delta(A_i)}{\delta(A_{i-1})} \right)^\alpha \left( \frac{\delta(A_i A_{i-1}) - \delta_{ref}(A_i A_{i-1})}{\delta_{ref}(A_i A_{i-1})} \right) \right]^2 \quad (4)$$

$$\alpha = \begin{cases} 1, & \delta(A_{i-1}) \leq \delta(A_i) \\ -1, & \delta(A_i) < \delta(A_{i-1}) \end{cases} \quad (5)$$

The bond-order alternation (BOA) is the electronic equivalent of BLA.<sup>4,6</sup> Both indices employ similar equations, with an average calculated in both cases. However, in this instance, the delocalisation index of successive bonds is used instead of bond distances.<sup>4,6,7</sup> Once again, the revised version, optimised for use with rings containing an odd number of atoms, was selected.<sup>5</sup> BOA's predictions are analogous to those of BLA.

$$\text{BOA} = \frac{1}{2n} \sum_{i=1}^n |\delta(A_i, A_{i+1}) - \delta(A_{i+1}, A_{i+2})| \quad (6)$$

One of the multicenter indices, designed by Giambiagi and colleagues, is  $I_{\text{ring}}$ ,<sup>12</sup> which provides information about electrons that are shared between multiple centers/atoms.<sup>10</sup> In Equation 7, the atomic overlap matrix of molecular orbitals  $i$  and  $j$  ( $S_{ij}(A) = \int_A dr \phi_i^*(r) \phi_j(r)$ )

is utilised to predict the aromaticity.<sup>6,10,13</sup> Notably, the sequence of atoms is crucial for  $I_{\text{ring}}$ , as the orbitals must overlap with two neighbouring atoms to create a circular pattern reminiscent of cyclic delocalisation.<sup>13</sup>

$$I_{\text{ring}} = 2^N \sum_{i_1 i_2 \dots i_n}^{\text{occ}} S_{i_1 i_2}(A_1) S_{i_2 i_3}(A_2) \dots S_{i_n i_1}(A_n) \quad (7)$$

The multicenter index (MCI) eliminates the constraint present in  $I_{\text{ring}}$  and encompasses all possible  $n!$  permutations  $P(A)$  of the atoms in the ring.<sup>6,10,13,14</sup> This approach is therefore not limited to the cyclic delocalisation but also incorporates cross-ring delocalisation, which may have a significant contribution to the aromaticity in some species otherwise invisible to  $I_{\text{ring}}$ .<sup>4,6,13</sup> Both  $I_{\text{ring}}$  and MCI employ the same criteria for predicting the type of aromaticity. Large positive and negative values corresponding to aromatic and antiaromatic rings, respectively, while results around zero indicate nonaromatic ones. Importantly, both criteria should be used on ring structures possessing between 3 to 16 atoms.<sup>13</sup>

$$\text{MCI} = \frac{1}{2N} \sum_{P(A)} I_{\text{ring}}(A) \quad (8)$$

The examination of multicenter delocalisation in large rings ( $n > 10$ ) is not possible with  $I_{\text{ring}}$  and MCI due to the presence of a significant numerical error.<sup>13</sup> However, Matito identified a solution by employing the same theoretical framework as the *para*-delocalisation index, namely that the delocalisation of *para*-localised atoms is greater than those of *meta*-localised ones.<sup>13</sup> The proposed index, AV1245, represents the average delocalisation between four multicenters and provides information about the ease with which electrons can move through the conjugated structure, or in other words, are shared between bonds.<sup>6,13</sup> However, the implementation of an average masks outliers, both large and small, and thus can obscure important information about the overall aromaticity of the structure.<sup>6</sup> By utilising the absolute value of the AV1245 segment with the lowest value, named  $AV_{\text{min}}$ , it is possible to identify the segment that impede free movement of electrons through the molecule.<sup>5,6</sup> The large outcomes of AV1245 and  $AV_{\text{min}}$  are indicative of aromatic structures. For non- and antiaromatic rings, the values are approximately zero. However, it is important to note that the values of both indices will decrease as the size of the structure increases.<sup>6</sup>

Szczepanik and colleagues have developed an electronic index that enables the visualisation of electron delocalisation at a global or local level.<sup>15,16</sup> Of the various electron density of delocalised bonds (EDDB) functions, the  $\text{EDDB}_H(r)$  was selected since it does not consider the hydrogen atoms present in the system, yet still provides a comprehensive overview of the global aromaticity.<sup>16</sup>

For a single-determinantal wavefunction, the  $\text{EDDB}_H(r)$  function can be obtained by utilising Equations 9 and 10.<sup>16</sup> In the former equation,  $\chi_\nu(r)$  represents the natural atomic orbitals (NAO), while  $D^{\Omega_H}$  is the density matrix whose trace represents a measurement of the global aromaticity, given that it contains the population of delocalised electrons throughout the system.<sup>16</sup>

$$\text{EDDB}_H(r) = \sum_{\mu\nu} \chi_\mu^\dagger(r) D_{\mu,\nu}^{\Omega_H} \chi_\nu(r) \quad (9)$$

The components of the  $D^{\Omega_H}$  matrix are comprised of several matrices (Equation 10). The  $P^\sigma$  matrix contains the  $\sigma$  spin-resolved charge and bond-order (CBO), while the  $C_{a,b}^\sigma$  matrix is responsible for the linear coefficients of the appropriately orthogonalised  $\sigma$  spin-resolved two-center bond-order orbitals (2cBO) of the chemical bond  $X_a-X_b$  after applying a diagonalisation of the off-diagonal block of the  $P^\sigma$  matrix.<sup>16</sup> The diagonal of  $\lambda_{a,b}^\sigma$  contains the eigenvalues of the 2cBO, which can be interpreted as the occupation numbers of the orbitals.<sup>16</sup> The  $\varepsilon_{a,b}^{\Omega_H}$  is also a diagonal matrix consisting of the  $\sigma$ -spin bond-conjugation factors.<sup>16</sup> In the case of a conjugated bond, at least one element of the diagonal will be close to 1, whereas in the case of a localised bond, the majority of elements will be close to 0.<sup>16</sup> The final matrix is the  $\Omega_H$ , which encompasses all possible atomic pairs ( $n(n-1)/2$ ) within an  $n$ -atomic system, irrespective of their bonding status.<sup>16</sup>

$$D^{\Omega_H} = 2 \sum_{\sigma=\alpha,\beta} P^\sigma \left[ \sum_{a,b}^{\Omega_H} C_{a,b}^\sigma \varepsilon_{a,b}^{\Omega_H^\sigma} (\lambda_{a,b}^\sigma)^2 C_{a,b}^{\sigma\dagger} \right] P^\sigma \quad (10)$$

Furthermore, it is possible to decompose the  $EDDB_H(r)$  function into the contributions of the different symmetry components ( $\sigma$ ,  $\pi$ , etc.).<sup>16</sup> By diagonalising the density matrix from Equation 10, the occupation numbers of the natural orbitals for bond delocalisation (NOBD) eigenfunctions can be obtained.<sup>16</sup> By using these occupation numbers, for example, the percentage of  $\pi$ -aromaticity can be determined, providing information on where the electrons are delocalised.<sup>16</sup>

## Magnetic indices

The magnetic indices were designed to investigate the response of a molecule to the presence of an external magnetic field ( $B^{ext}$ ) perpendicular to the molecular plane.<sup>17</sup> The application of such a magnetic field results in the  $\pi$ -electrons within the ring moving in a circular motion, thereby generating a diatropic ring current ( $J^d$ ) outside the ring moving clockwise, and a paratropic ( $J^p$ ) one inside moving counter clockwise, at all times.<sup>18</sup> These currents generate an induced magnetic field ( $B^{ind}$ ), which is opposite to the external magnetic field in the case of the diatropic current while the paratropic current strengthens the external field.<sup>18</sup>

The nucleus independent chemical shift (NICS) is a method that establishes the aromaticity of a ring by capturing the magnetic shielding of a ghost atom (Bq), since this is influenced by the induced magnetic field.<sup>19-21</sup> The choice of this type of atom is based on its status as an innocent observer, as it lacks a nucleus that could affect the measurement.<sup>17,21</sup> Which would be the case when lithium or helium was selected.<sup>17,21</sup> Within the NICS method, different variations exist depending on the position of the ghost atom and the tensor components considered.<sup>20</sup> In NICS(0), the Bq atom is placed in the center of the ring.<sup>20</sup> However, this position is susceptible to unnegligible  $\sigma$ -contributions.<sup>20</sup> In order to address this issue, the Bq atom was relocated 1 Å above the center of the ring (NICS(1)).<sup>20</sup> A further approach to study only the  $\pi$ -contributions is to combine the gauge-independent atomic orbitals (GIAO) method with the out-of-plane tensor (NICS(1)<sub>zz</sub>).<sup>20,22</sup> Finally, after performing an NMR calculation, the negative of the magnetic shielding of the ghost atom is taken to ascertain the aromaticity.<sup>18,20,23</sup> Typically, large positive and negative values of NICS can be found for aromatic and antiaromatic rings, respectively.

The gauge including magnetically induced current (GIMIC) method, which determines the magnetically induced current density by multiplying the current susceptibility and the strength of the external magnetic field,<sup>18</sup> is another magnetic index. As with the NICS method, the GIAO approach is also employed. By applying this method, the current density is made independent of the magnetic field, and the basis set conversion can be improved.<sup>18,24</sup> The aromaticity of a molecule is established by calculating the strength of the current density using a numerical integration.<sup>18</sup> This strength is comprised of two contributions: a diatropic (+) and a paratropic (-) one.<sup>18</sup> The sign of the sum of these contributions allows the dominant ring current to be identified and linked to the aromaticity. Aromatic systems possess a dominant diatropic ring current, while antiaromatic compounds a paratropic ring current.<sup>18</sup> It is important to note that nonaromatic molecules also possess both diatropic and paratropic contributions, but these cancel each other out when summed.<sup>18</sup>

## Reactivity index

The relative hardness ( $\Delta\eta$ ) is obtained by taking the difference between the lowest unoccupied molecular orbital (LUMO) and highest occupied molecular orbital (HOMO) orbital energies ( $\varepsilon$ ) of the indene (**A**) and isoindene (**C**) structures (Equation 11) from the ISE<sub>II</sub> method (Figure 1).<sup>25</sup>

$$\Delta\eta = \eta_A - \eta_C = (\varepsilon_{LUMO_A} - \varepsilon_{HOMO_A}) - (\varepsilon_{LUMO_C} - \varepsilon_{HOMO_C}) \quad (11)$$

De Proft and Geerlings have previously demonstrated that determining  $\Delta\eta$  by utilising the methyl-methylene structures, derived from the ISE<sub>I</sub> method, is an effective way of acquiring the aromaticity.<sup>25</sup> In their paper, they report that, in accordance with the maximum hardness principle, the methyl derivative is expected to be harder than the methylene, which should also indicate aromatic structures.<sup>25</sup> Applying the same reasoning to the ISE<sub>II</sub> isomers, we expect the indene to be harder than the isoindene isomer when indicating the presence of an aromatic macrocycle, and vice versa.

## Annulene structures

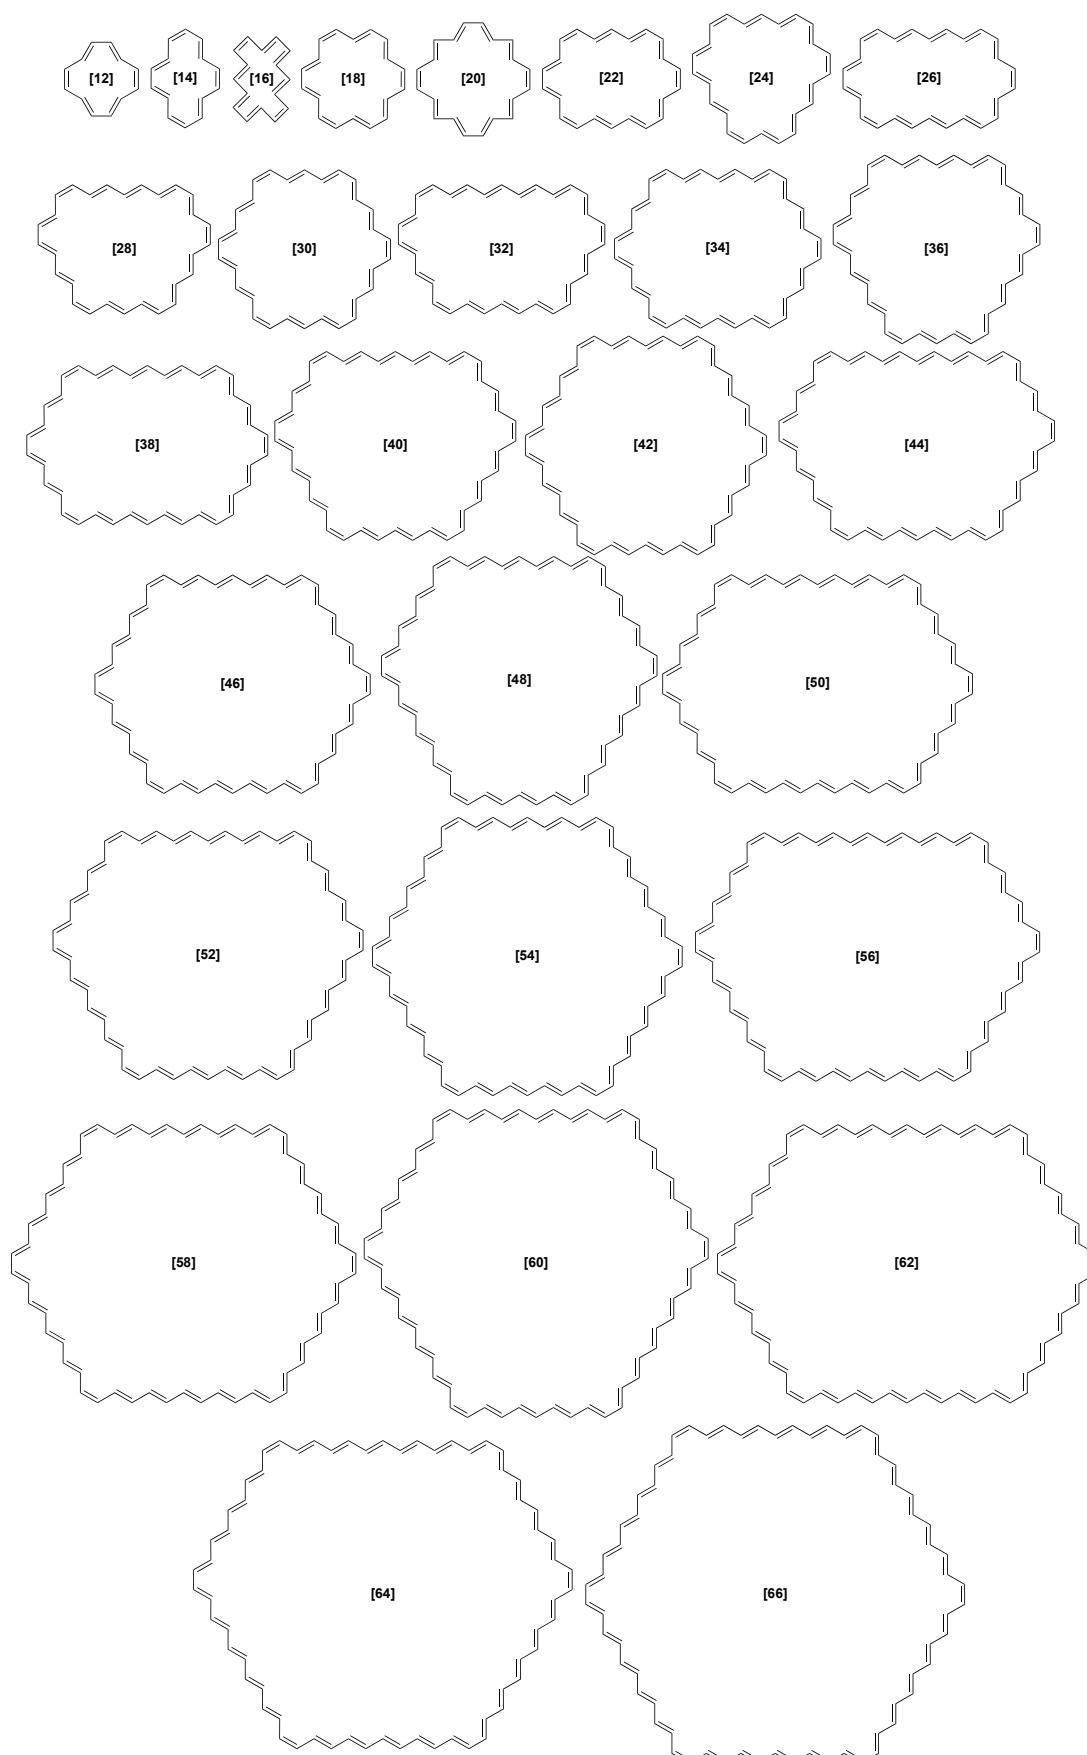

**Figure S1:** The test bed for the examination of the Hückel and Baird rules in  $[4n]$  and  $[4n+2]$  annulenes ( $N = 12-66$ , even).

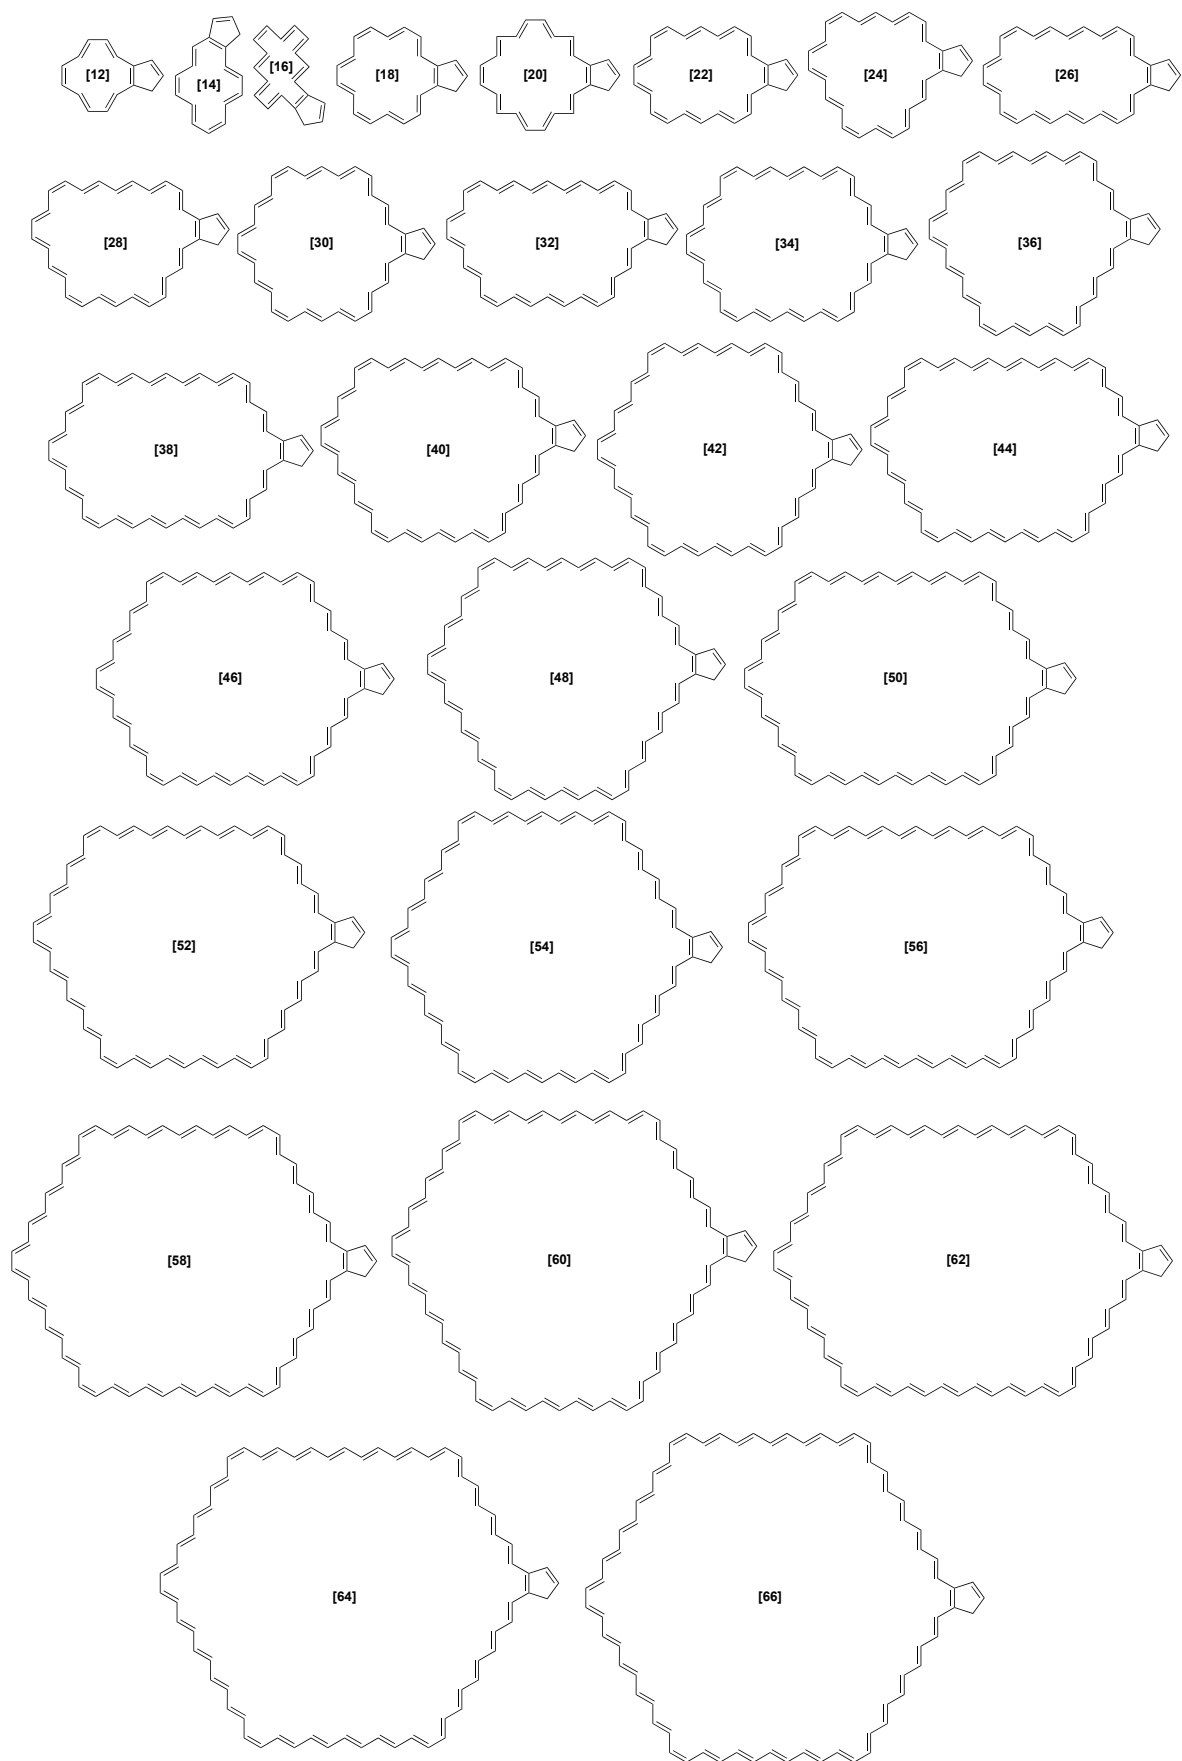

**Figure S2:** The geometries of the indene isomers **A** of the ISE<sub>II</sub> method to obtain the ASE results.

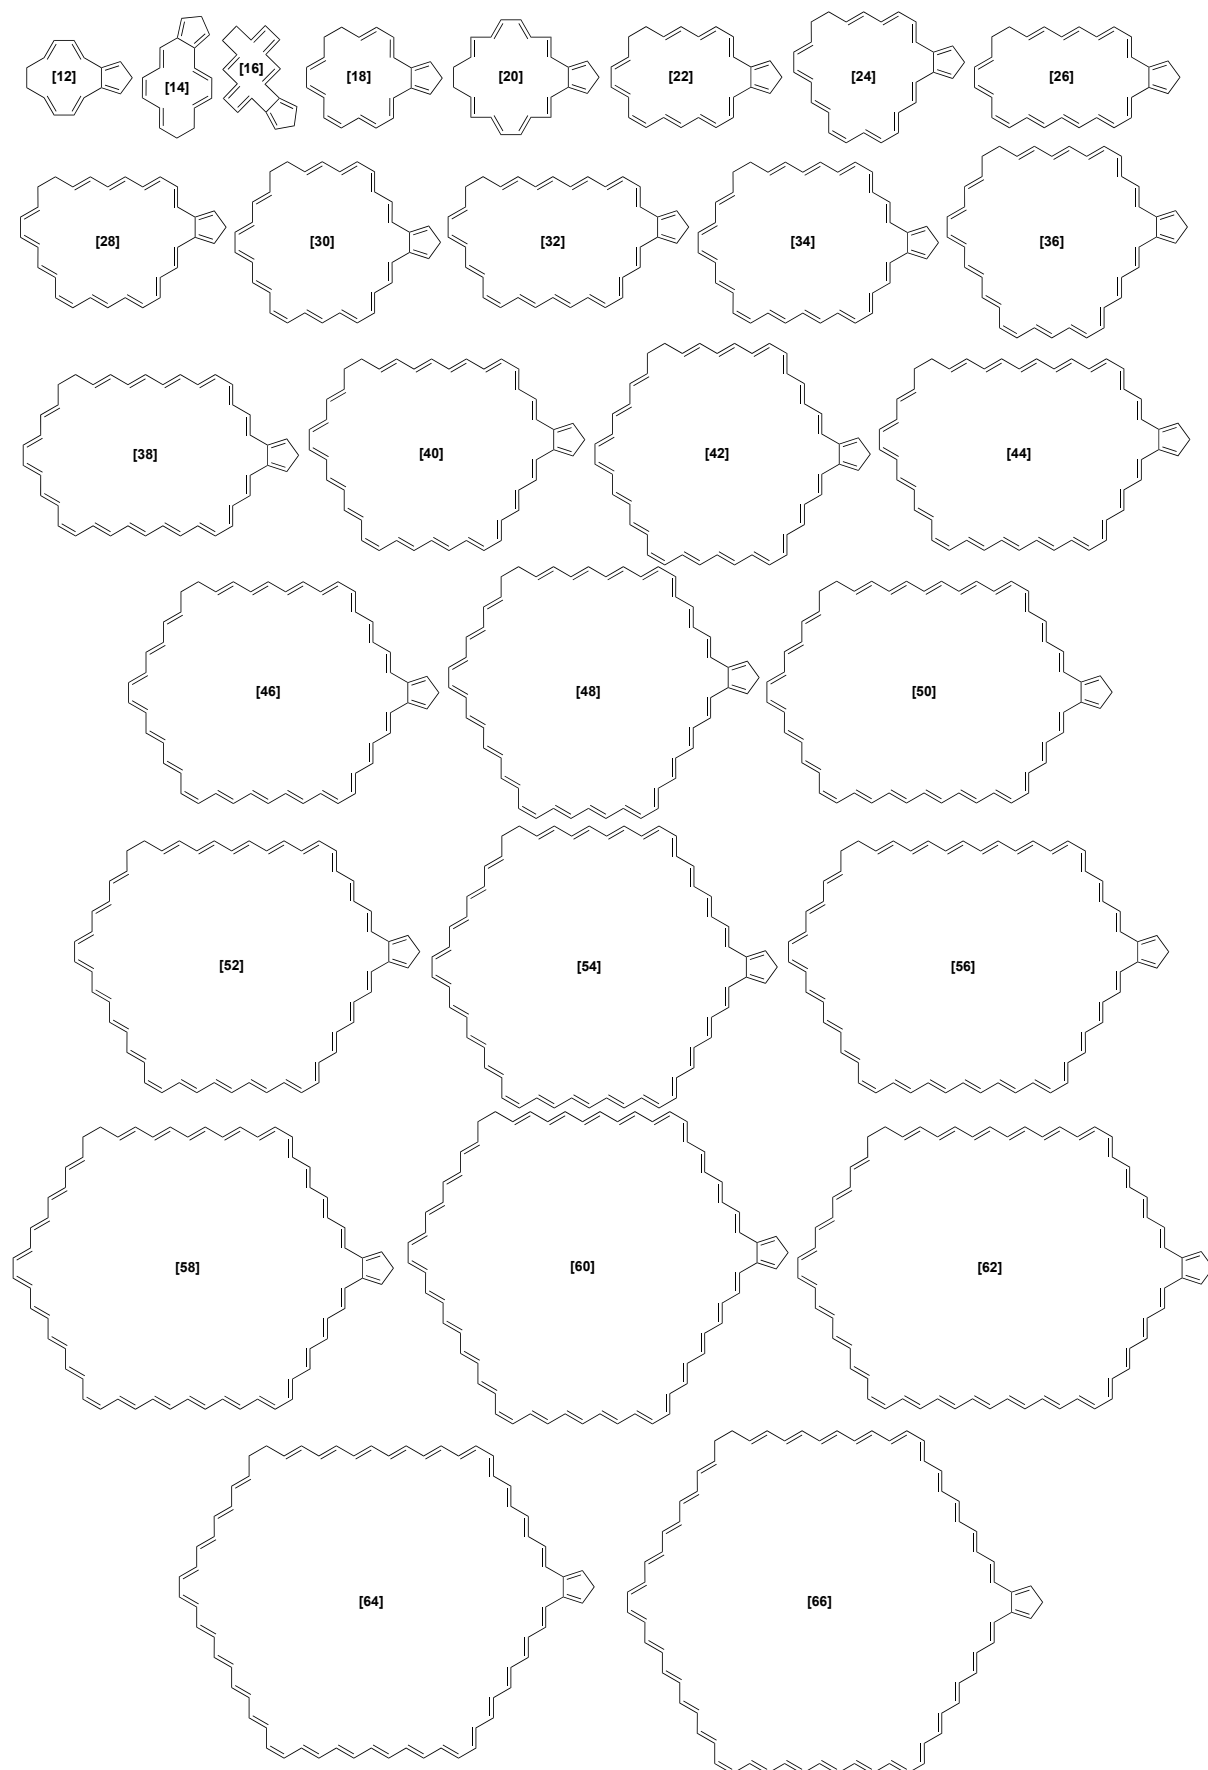

**Figure S3:** The geometries of the dihydro isoindene derivatives **B** in the ISE<sub>II</sub> method needed to implement the *anti-syn* corrections for the evaluation of the ASE.

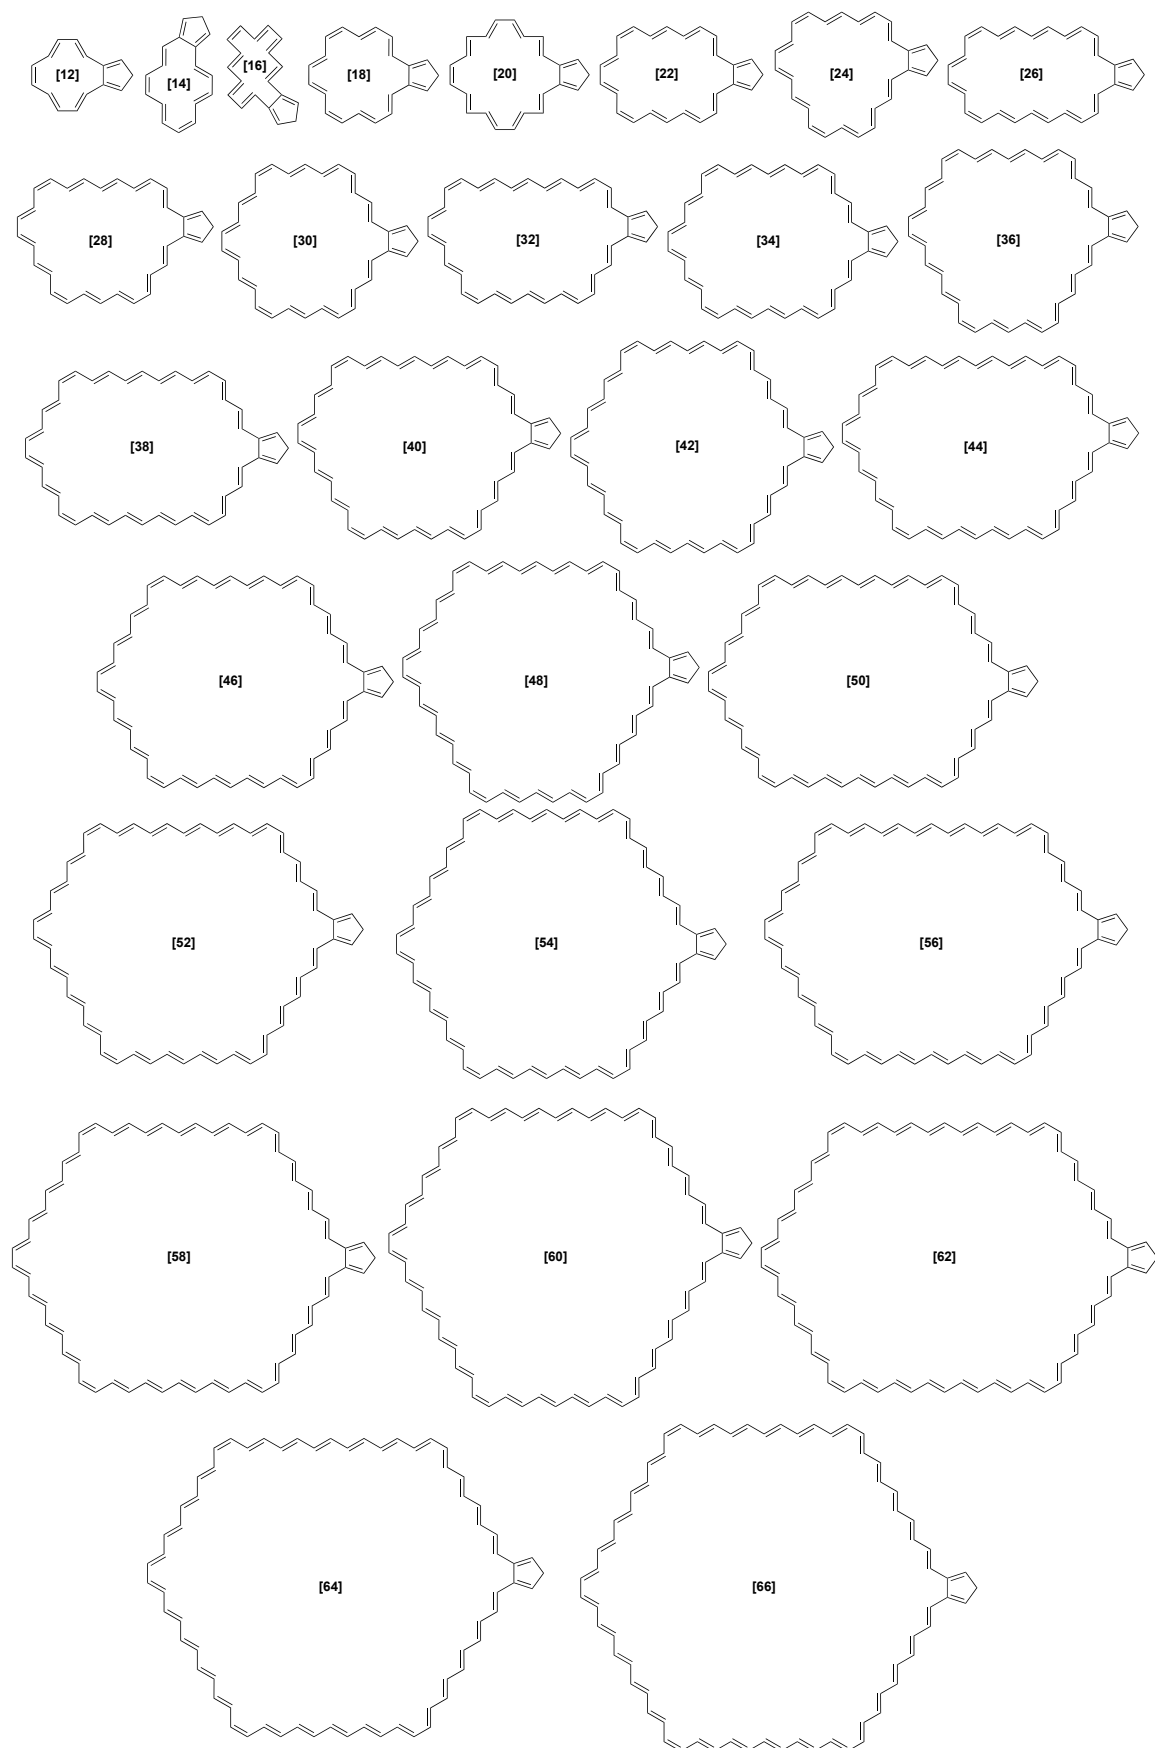

**Figure S4:** The geometries of the isoindene isomers C of the ISE<sub>II</sub> method to obtain the ASE results.



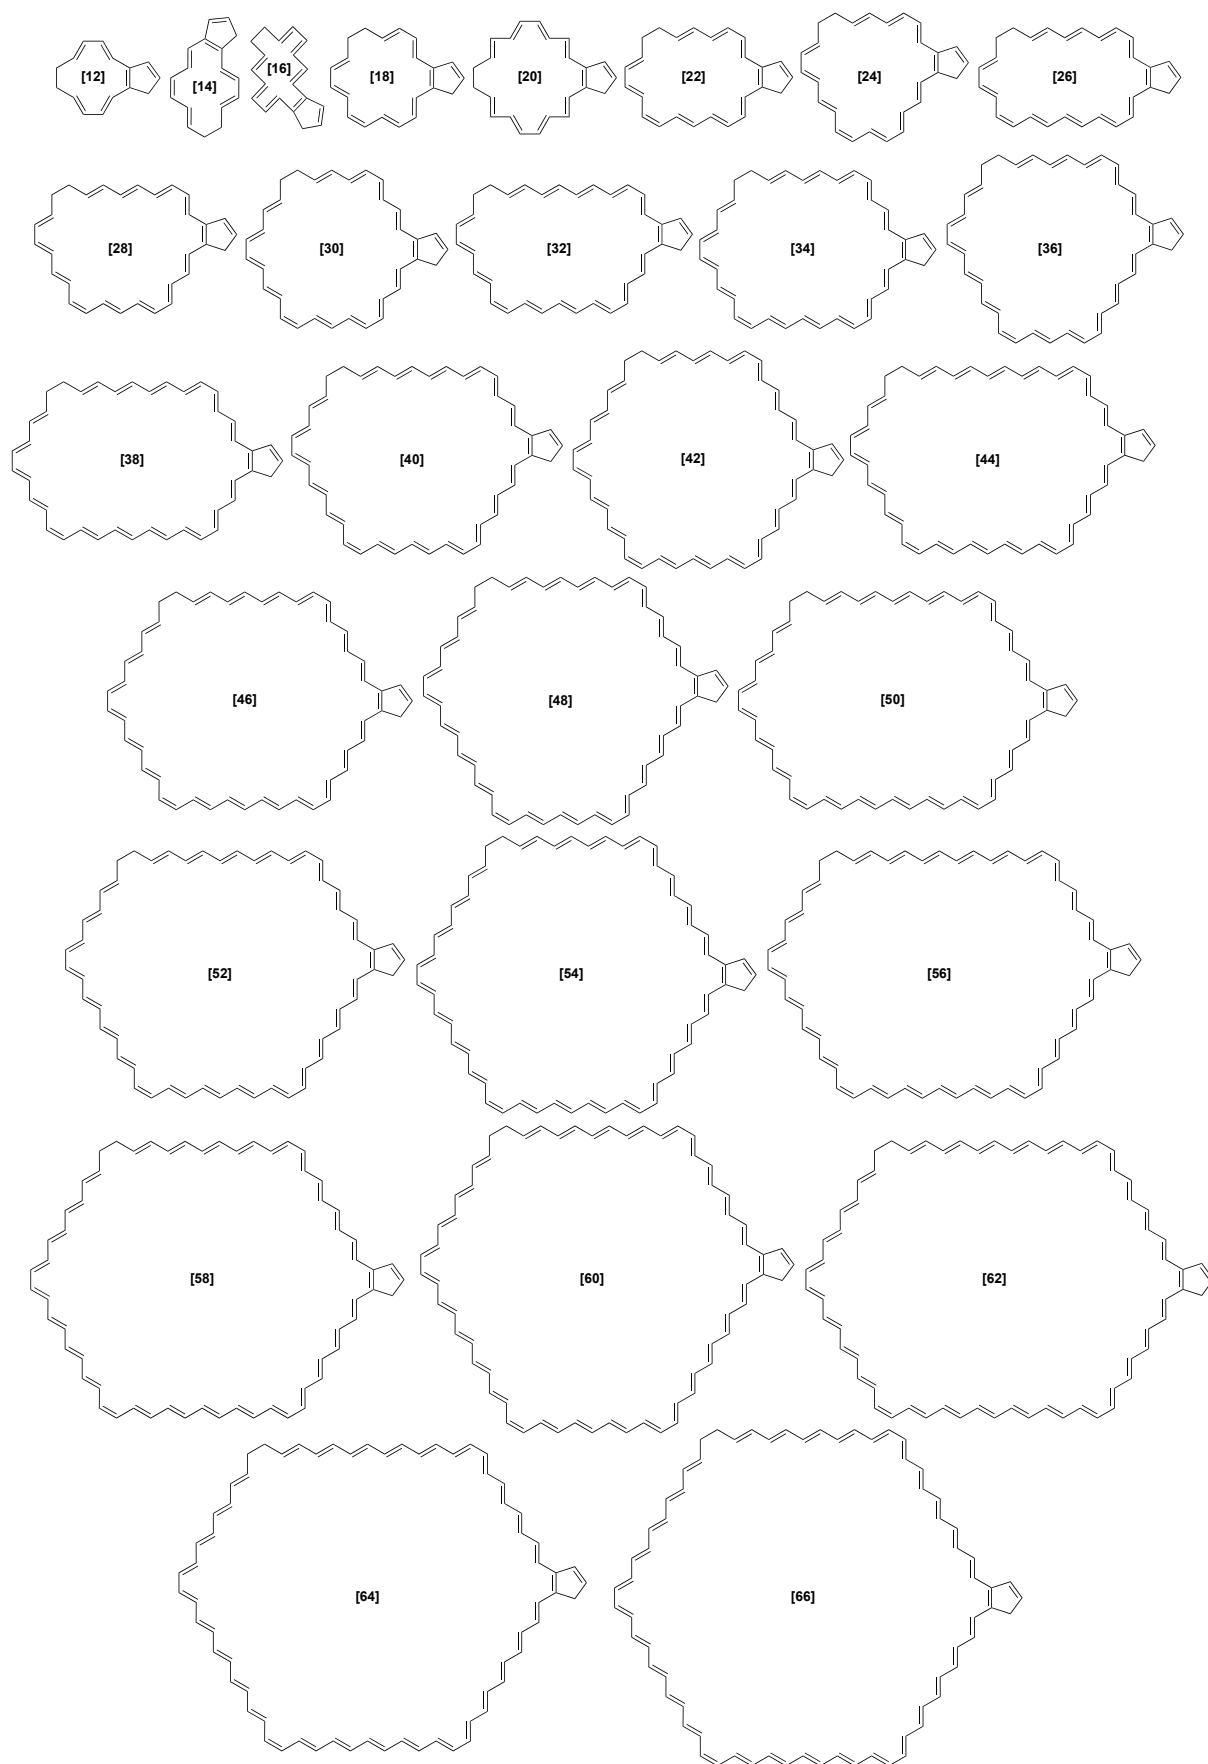

**Figure S5:** The geometries of the dihydro indene derivatives **D** in the ISE<sub>II</sub> method needed to implement the *anti-syn* corrections for the evaluation of the ASE.

## Influence of the level of theory on the evaluation of aromaticity indices

### ASE

#### Aromatic stabilisation energy

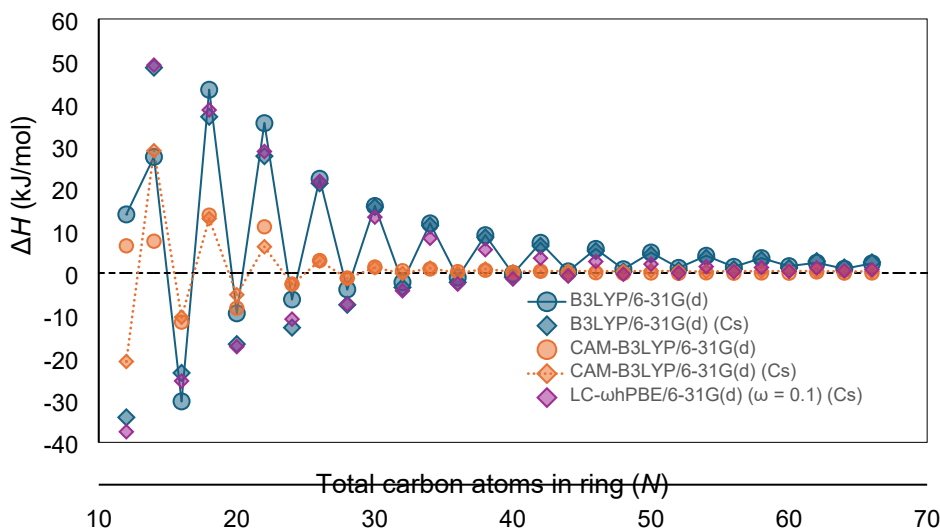

**Figure S6:** Influence of the level of theory on the ASE of closed-shell  $[N]$ annulenes ( $N = 12-66$ ). The molecular geometries were constrained to  $C_s$  symmetry and optimised at the B3LYP/6-31G(d), CAM-B3LYP/6-31G(d), and LC- $\omega$ hPBE/6-31G(d) levels of theory (data taken from ref. [26]). Additionally, the molecular geometries were reoptimised using B3LYP/6-31G(d) and CAM-B3LYP/6-31G(d) without symmetry constraint to determine the influence of planarity on the evaluation of stabilization energies.

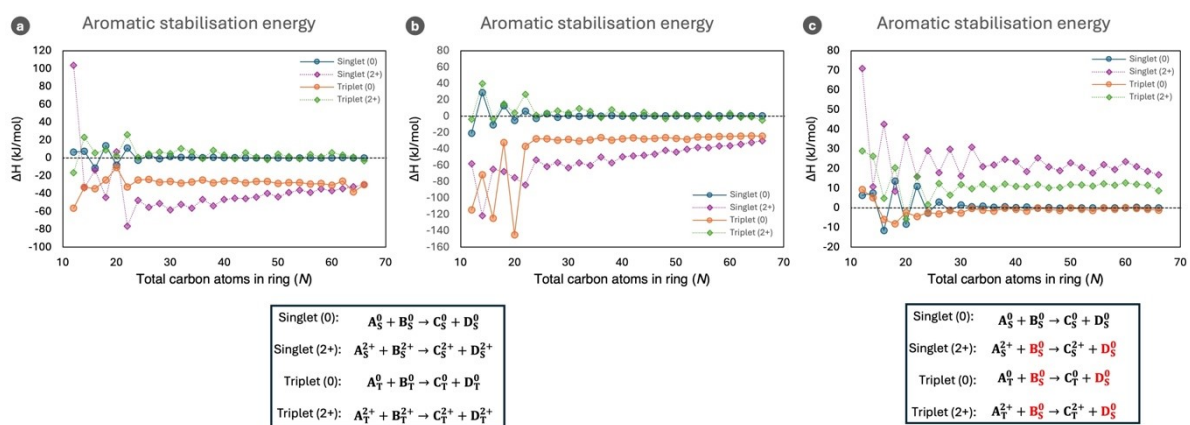

**Figure S7:** ASEs of the neutral closed-shell and triplet  $[N]$ annulenes as well as the triplet and singlet dicationic counterparts ( $N=12-66$ ) computed at the (U)CAM-B3LYP/6-31G(d). A) The structures to evaluate the ASE values were not subjected to any constraints. The geometries of **A**, **B**, **C**, and **D** do not contain any imaginary frequencies. B) All the structures in the ASE calculations are enforced to be planar. Consequently, several geometries contain one or more imaginary frequencies. C) The electronic energy and ZPVE of the **B** and **D** structures employed in the ISE<sub>II</sub> method exhibit  $C_s$  symmetry. By contrast, the structure of **A** and **C** were optimised without any constraints.

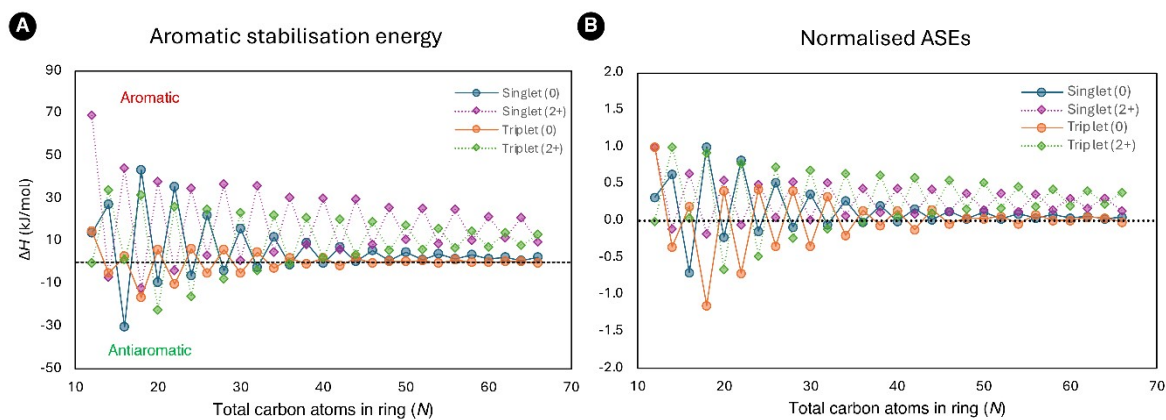

**Figure S8:** ASE results of the neutral closed-shell and triplet [N]annulenes as well as the triplet and singlet dicationic counterparts computed at the B3LYP/6-31G(d). A) The electronic energy and ZPVE of the **B** and **D** structures employed in the ISE<sub>II</sub> method were derived from ref. [26] and exhibit C<sub>s</sub> symmetry. By contrast, the structure of **A** and **C** were optimised without any constraints. B) The normalized ASE values for all the series. The highest positive ASE value is set to be equal to 1 for each series.

## HOMA

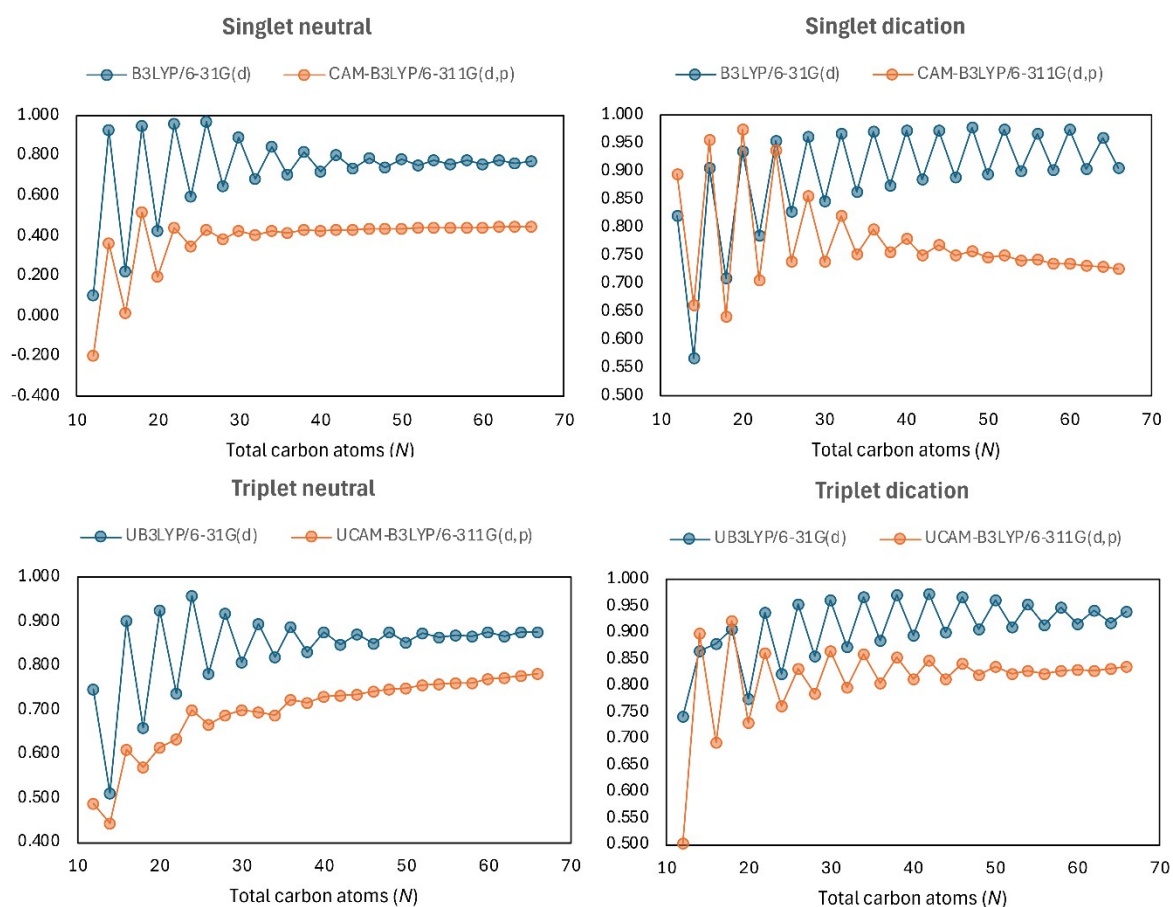

**Figure S9:** The evolution of the structural index HOMA of neutral and charged annulenes in the singlet and triplet states ( $N = 12-66$ ) obtained with two different levels of theory with functionals including a different percentage of Hartree Fock exchange: B3LYP (19%) and CAM-B3LYP (19-65%). Note that different scales are used to illustrate better the differences for neutral/charged singlet and triplet annulenes.

**Table S1:** The HOMA index of the [N]annulenes (N=12-66) with distinct charges and multiplicities obtained using two different level of theory.

| N  | (U)B3LYP/6-31G(d) |              |             |              | (U)CAM-B3LYP/6-311G(d,p) |              |             |              |
|----|-------------------|--------------|-------------|--------------|--------------------------|--------------|-------------|--------------|
|    | Singlet (0)       | Singlet (2+) | Triplet (0) | Triplet (2+) | Singlet (0)              | Singlet (2+) | Triplet (0) | Triplet (2+) |
| 12 | 0.105             | 0.821        | 0.746       | 0.743        | -0.194                   | 0.895        | 0.488       | 0.504        |
| 14 | 0.929             | 0.568        | 0.513       | 0.865        | 0.365                    | 0.661        | 0.443       | 0.899        |
| 16 | 0.225             | 0.906        | 0.902       | 0.878        | 0.015                    | 0.955        | 0.610       | 0.693        |
| 18 | 0.946             | 0.709        | 0.660       | 0.906        | 0.518                    | 0.642        | 0.572       | 0.922        |
| 20 | 0.427             | 0.936        | 0.925       | 0.775        | 0.197                    | 0.974        | 0.616       | 0.731        |
| 22 | 0.960             | 0.785        | 0.738       | 0.938        | 0.443                    | 0.706        | 0.635       | 0.861        |
| 24 | 0.597             | 0.953        | 0.958       | 0.823        | 0.348                    | 0.938        | 0.701       | 0.762        |
| 26 | 0.967             | 0.828        | 0.783       | 0.953        | 0.430                    | 0.739        | 0.667       | 0.833        |
| 28 | 0.650             | 0.962        | 0.918       | 0.855        | 0.383                    | 0.856        | 0.688       | 0.786        |
| 30 | 0.892             | 0.847        | 0.809       | 0.962        | 0.425                    | 0.740        | 0.700       | 0.866        |
| 32 | 0.683             | 0.966        | 0.895       | 0.874        | 0.405                    | 0.821        | 0.696       | 0.797        |
| 34 | 0.846             | 0.864        | 0.821       | 0.967        | 0.426                    | 0.752        | 0.689       | 0.859        |
| 36 | 0.706             | 0.971        | 0.887       | 0.886        | 0.417                    | 0.796        | 0.723       | 0.806        |
| 38 | 0.819             | 0.875        | 0.833       | 0.970        | 0.430                    | 0.756        | 0.717       | 0.854        |
| 40 | 0.722             | 0.973        | 0.876       | 0.895        | 0.425                    | 0.780        | 0.729       | 0.812        |
| 42 | 0.801             | 0.886        | 0.848       | 0.973        | 0.432                    | 0.751        | 0.733       | 0.848        |
| 44 | 0.734             | 0.973        | 0.872       | 0.902        | 0.431                    | 0.768        | 0.735       | 0.813        |
| 46 | 0.790             | 0.890        | 0.851       | 0.968        | 0.435                    | 0.750        | 0.742       | 0.842        |
| 48 | 0.743             | 0.977        | 0.876       | 0.907        | 0.435                    | 0.759        | 0.747       | 0.820        |
| 50 | 0.784             | 0.895        | 0.852       | 0.962        | 0.438                    | 0.747        | 0.749       | 0.836        |
| 52 | 0.750             | 0.975        | 0.873       | 0.911        | 0.439                    | 0.750        | 0.756       | 0.822        |
| 54 | 0.779             | 0.900        | 0.866       | 0.953        | 0.440                    | 0.741        | 0.759       | 0.829        |
| 56 | 0.755             | 0.967        | 0.868       | 0.914        | 0.441                    | 0.743        | 0.761       | 0.823        |
| 58 | 0.777             | 0.902        | 0.868       | 0.947        | 0.442                    | 0.736        | 0.762       | 0.829        |
| 60 | 0.759             | 0.975        | 0.877       | 0.916        | 0.443                    | 0.736        | 0.770       | 0.831        |
| 62 | 0.776             | 0.903        | 0.868       | 0.943        | 0.444                    | 0.731        | 0.772       | 0.829        |
| 64 | 0.762             | 0.959        | 0.877       | 0.918        | 0.445                    | 0.730        | 0.777       | 0.832        |
| 66 | 0.774             | 0.906        | 0.875       | 0.939        | 0.446                    | 0.726        | 0.781       | 0.836        |

## BLA

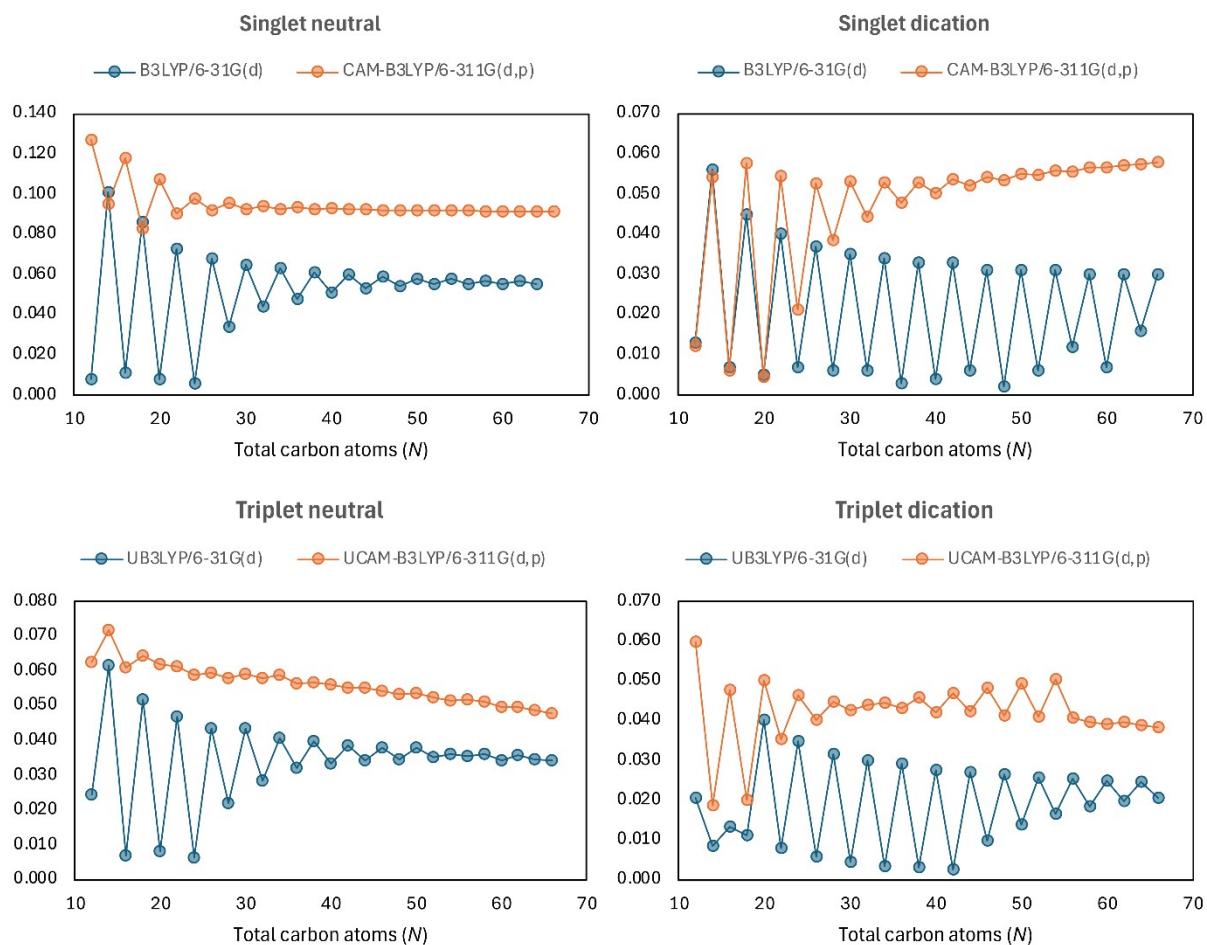

**Figure S10:** The evolution of the structural index BLA of neutral and charged annulenes in the singlet and triplet states ( $N = 12-66$ ) obtained with two different levels of theory with functionals including a different percentage of Hartree Fock exchange: B3LYP (19%) and CAM-B3LYP (19-65%). Note that different scales are used to illustrate better the differences for neutral/charged singlet and triplet annulenes.

**Table S2:** The BLA index of the  $[N]$ annulenes ( $N = 12-66$ ) with distinct charges and multiplicities obtained using two different level of theory.

| $N$ | (U)B3LYP/6-31G(d) |              |             |              | (U)CAM-B3LYP/6-311G(d,p) |              |             |              |
|-----|-------------------|--------------|-------------|--------------|--------------------------|--------------|-------------|--------------|
|     | Singlet (0)       | Singlet (2+) | Triplet (0) | Triplet (2+) | Singlet (0)              | Singlet (2+) | Triplet (0) | Triplet (2+) |
| 12  | 0.104             | 0.013        | 0.024       | 0.021        | 0.127                    | 0.012        | 0.062       | 0.060        |
| 14  | 0.008             | 0.056        | 0.062       | 0.008        | 0.095                    | 0.054        | 0.072       | 0.019        |
| 16  | 0.101             | 0.007        | 0.007       | 0.013        | 0.118                    | 0.006        | 0.061       | 0.048        |
| 18  | 0.011             | 0.045        | 0.052       | 0.011        | 0.083                    | 0.058        | 0.064       | 0.020        |
| 20  | 0.086             | 0.005        | 0.008       | 0.040        | 0.107                    | 0.004        | 0.062       | 0.050        |
| 22  | 0.008             | 0.040        | 0.047       | 0.008        | 0.090                    | 0.054        | 0.061       | 0.035        |
| 24  | 0.073             | 0.007        | 0.006       | 0.035        | 0.098                    | 0.021        | 0.059       | 0.046        |
| 26  | 0.006             | 0.037        | 0.044       | 0.006        | 0.092                    | 0.053        | 0.060       | 0.040        |
| 28  | 0.068             | 0.006        | 0.022       | 0.032        | 0.096                    | 0.038        | 0.058       | 0.045        |
| 30  | 0.034             | 0.035        | 0.043       | 0.004        | 0.092                    | 0.053        | 0.059       | 0.043        |
| 32  | 0.065             | 0.006        | 0.028       | 0.030        | 0.094                    | 0.044        | 0.058       | 0.044        |
| 34  | 0.044             | 0.034        | 0.041       | 0.004        | 0.092                    | 0.053        | 0.059       | 0.045        |
| 36  | 0.063             | 0.003        | 0.032       | 0.029        | 0.093                    | 0.048        | 0.056       | 0.043        |
| 38  | 0.048             | 0.033        | 0.040       | 0.003        | 0.092                    | 0.053        | 0.057       | 0.046        |
| 40  | 0.061             | 0.004        | 0.033       | 0.027        | 0.093                    | 0.050        | 0.056       | 0.042        |
| 42  | 0.051             | 0.033        | 0.038       | 0.003        | 0.092                    | 0.054        | 0.055       | 0.047        |
| 44  | 0.060             | 0.006        | 0.034       | 0.027        | 0.092                    | 0.052        | 0.055       | 0.042        |
| 46  | 0.053             | 0.031        | 0.038       | 0.010        | 0.092                    | 0.054        | 0.054       | 0.048        |
| 48  | 0.059             | 0.002        | 0.034       | 0.026        | 0.092                    | 0.053        | 0.053       | 0.041        |
| 50  | 0.054             | 0.031        | 0.038       | 0.014        | 0.092                    | 0.055        | 0.054       | 0.049        |
| 52  | 0.058             | 0.006        | 0.035       | 0.026        | 0.092                    | 0.055        | 0.052       | 0.041        |
| 54  | 0.055             | 0.031        | 0.036       | 0.016        | 0.092                    | 0.056        | 0.051       | 0.050        |
| 56  | 0.058             | 0.012        | 0.036       | 0.025        | 0.092                    | 0.056        | 0.052       | 0.041        |
| 58  | 0.055             | 0.030        | 0.036       | 0.018        | 0.092                    | 0.056        | 0.051       | 0.039        |
| 60  | 0.057             | 0.007        | 0.034       | 0.025        | 0.092                    | 0.057        | 0.050       | 0.039        |
| 62  | 0.055             | 0.030        | 0.036       | 0.020        | 0.091                    | 0.057        | 0.050       | 0.040        |
| 64  | 0.057             | 0.016        | 0.034       | 0.025        | 0.091                    | 0.057        | 0.049       | 0.039        |
| 66  | 0.055             | 0.030        | 0.034       | 0.021        | 0.091                    | 0.058        | 0.048       | 0.038        |

## FLU

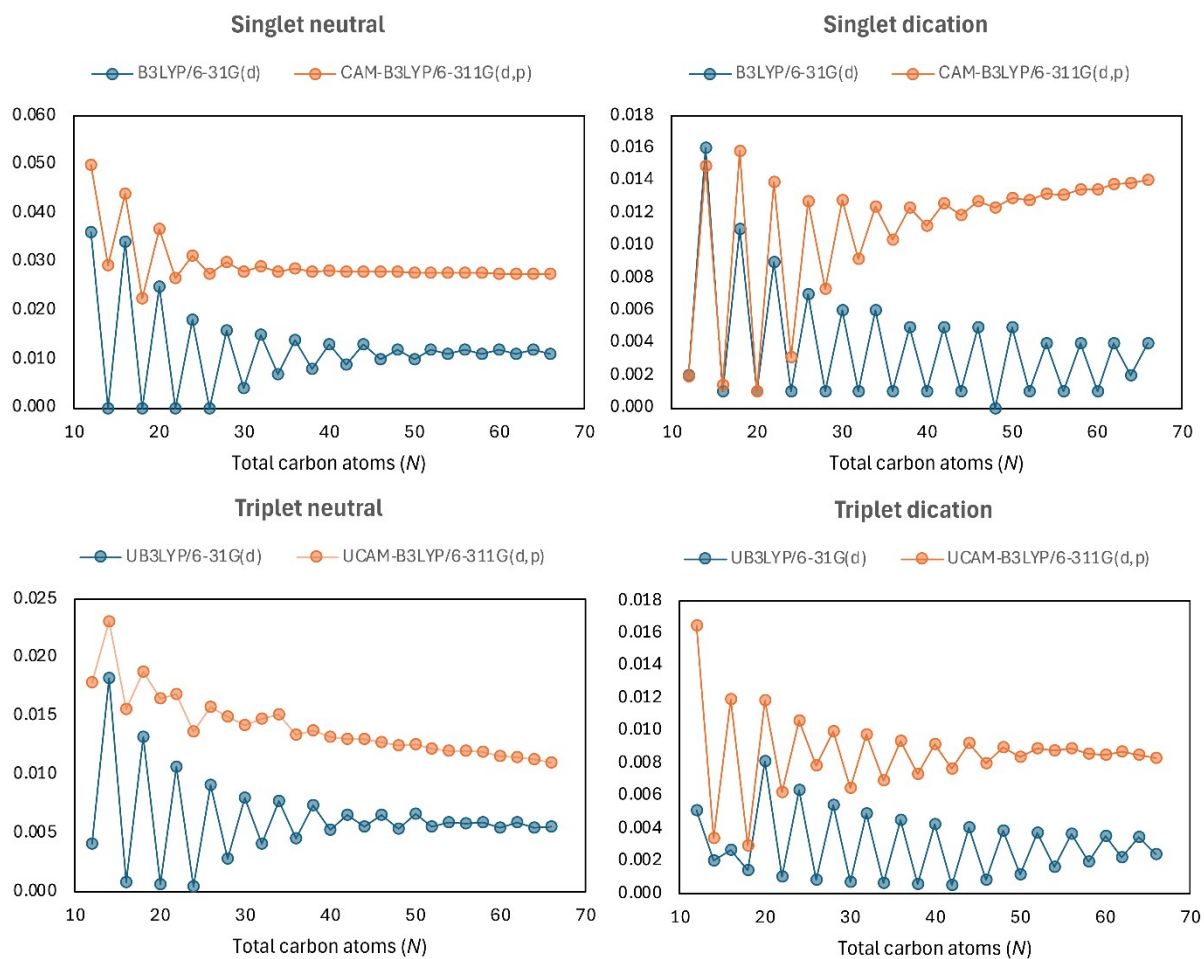

**Figure S11:** The evolution of the electronic index FLU of neutral and charged annulenes in the singlet and triplet states ( $N = 12-66$ ) obtained with two different levels of theory with functionals including a different percentage of Hartree Fock exchange: B3LYP (19%) and CAM-B3LYP (19-65%). Note that different scales are used to illustrate better the differences for neutral/charged singlet and triplet annulenes.



**Table S3:** The FLU index of the  $[N]$ annulenes ( $N = 12-66$ ) with distinct charges and multiplicities obtained using two different level of theory.

| $N$ | (U)B3LYP/6-31G(d) |              |             |              | (U)CAM-B3LYP/6-311G(d,p) |              |             |              |
|-----|-------------------|--------------|-------------|--------------|--------------------------|--------------|-------------|--------------|
|     | Singlet (0)       | Singlet (2+) | Triplet (0) | Triplet (2+) | Singlet (0)              | Singlet (2+) | Triplet (0) | Triplet (2+) |
| 12  | 0.036             | 0.002        | 0.004       | 0.005        | 0.050                    | 0.002        | 0.018       | 0.016        |
| 14  | 0.000             | 0.016        | 0.018       | 0.002        | 0.029                    | 0.015        | 0.023       | 0.003        |
| 16  | 0.034             | 0.001        | 0.001       | 0.003        | 0.044                    | 0.001        | 0.016       | 0.012        |
| 18  | 0.000             | 0.011        | 0.013       | 0.001        | 0.023                    | 0.016        | 0.019       | 0.003        |
| 20  | 0.025             | 0.001        | 0.001       | 0.008        | 0.037                    | 0.001        | 0.016       | 0.012        |
| 22  | 0.000             | 0.009        | 0.011       | 0.001        | 0.027                    | 0.014        | 0.017       | 0.006        |
| 24  | 0.018             | 0.001        | 0.000       | 0.006        | 0.031                    | 0.003        | 0.014       | 0.011        |
| 26  | 0.000             | 0.007        | 0.009       | 0.001        | 0.028                    | 0.013        | 0.016       | 0.008        |
| 28  | 0.016             | 0.001        | 0.003       | 0.005        | 0.030                    | 0.007        | 0.015       | 0.010        |
| 30  | 0.004             | 0.006        | 0.008       | 0.001        | 0.028                    | 0.013        | 0.014       | 0.007        |
| 32  | 0.015             | 0.001        | 0.004       | 0.005        | 0.029                    | 0.009        | 0.015       | 0.010        |
| 34  | 0.007             | 0.006        | 0.008       | 0.001        | 0.028                    | 0.012        | 0.015       | 0.007        |
| 36  | 0.014             | 0.001        | 0.005       | 0.005        | 0.029                    | 0.010        | 0.013       | 0.009        |
| 38  | 0.008             | 0.005        | 0.007       | 0.001        | 0.028                    | 0.012        | 0.014       | 0.007        |
| 40  | 0.013             | 0.001        | 0.005       | 0.004        | 0.028                    | 0.011        | 0.013       | 0.009        |
| 42  | 0.009             | 0.005        | 0.007       | 0.001        | 0.028                    | 0.013        | 0.013       | 0.008        |
| 44  | 0.013             | 0.001        | 0.006       | 0.004        | 0.028                    | 0.012        | 0.013       | 0.009        |
| 46  | 0.010             | 0.005        | 0.007       | 0.001        | 0.028                    | 0.013        | 0.013       | 0.008        |
| 48  | 0.012             | 0.000        | 0.005       | 0.004        | 0.028                    | 0.012        | 0.013       | 0.009        |
| 50  | 0.010             | 0.005        | 0.007       | 0.001        | 0.028                    | 0.013        | 0.013       | 0.008        |
| 52  | 0.012             | 0.001        | 0.006       | 0.004        | 0.028                    | 0.013        | 0.012       | 0.009        |
| 54  | 0.011             | 0.004        | 0.006       | 0.002        | 0.028                    | 0.013        | 0.012       | 0.009        |
| 56  | 0.012             | 0.001        | 0.006       | 0.004        | 0.028                    | 0.013        | 0.012       | 0.009        |
| 58  | 0.011             | 0.004        | 0.006       | 0.002        | 0.028                    | 0.013        | 0.012       | 0.009        |
| 60  | 0.012             | 0.001        | 0.005       | 0.004        | 0.028                    | 0.013        | 0.012       | 0.009        |
| 62  | 0.011             | 0.004        | 0.006       | 0.002        | 0.028                    | 0.014        | 0.012       | 0.009        |
| 64  | 0.012             | 0.002        | 0.005       | 0.004        | 0.028                    | 0.014        | 0.011       | 0.009        |
| 66  | 0.011             | 0.004        | 0.006       | 0.002        | 0.028                    | 0.014        | 0.011       | 0.008        |

## BOA

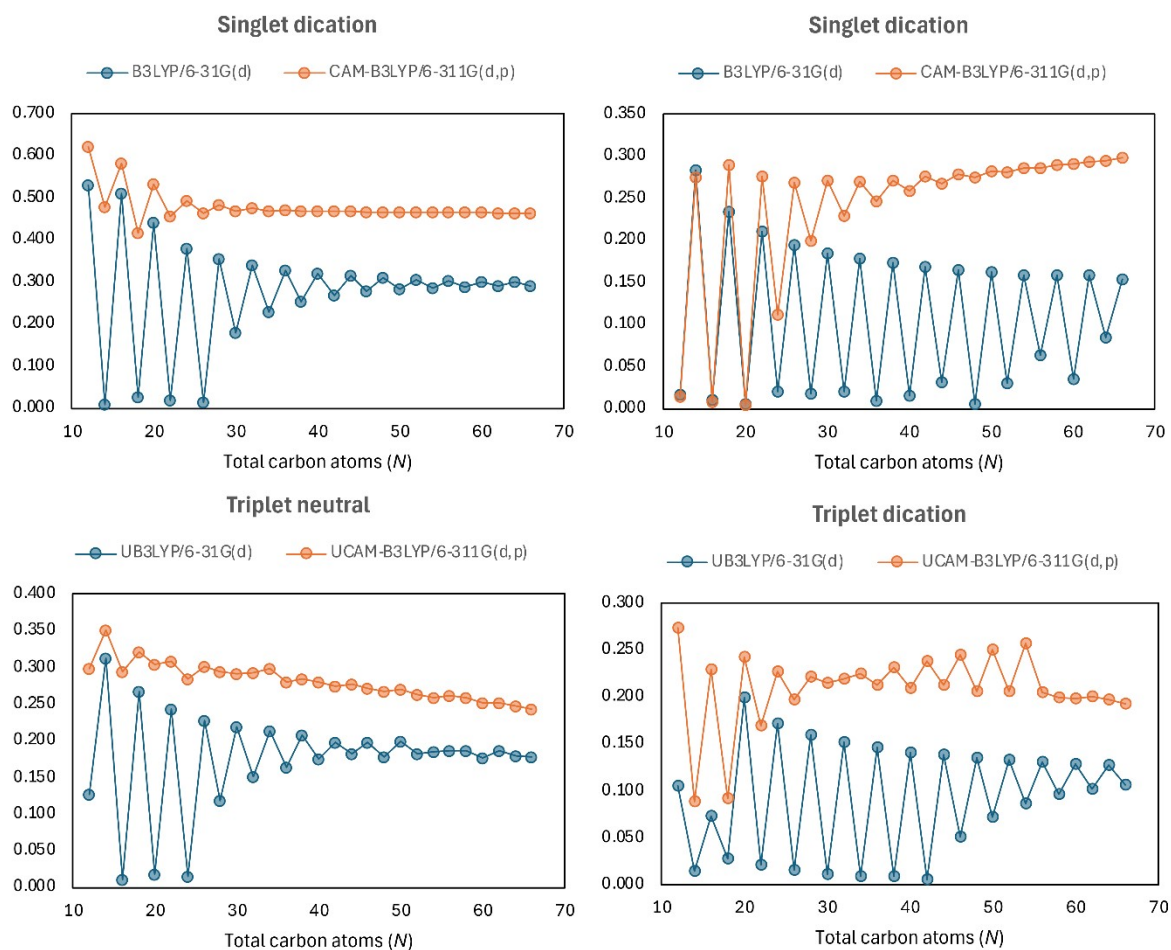

**Figure S12:** The evolution of the electronic index BOA of neutral and charged annulenes in the singlet and triplet states ( $N = 12-66$ ) obtained with two different levels of theory with functionals including a different percentage of Hartree Fock exchange: B3LYP (19%) and CAM-B3LYP (19-65%). Note that different scales are used to illustrate better the differences for neutral/charged singlet and triplet annulenes.

**Table S4:** The electronic BOA index of the  $[N]$ annulenes ( $N = 12-66$ ) with distinct charges and multiplicities obtained using two different level of theory.

| $N$ | (U)B3LYP/6-31G(d) |              |             |              | (U)CAM-B3LYP/6-311G(d,p) |              |             |              |
|-----|-------------------|--------------|-------------|--------------|--------------------------|--------------|-------------|--------------|
|     | Singlet (0)       | Singlet (2+) | Triplet (0) | Triplet (2+) | Singlet (0)              | Singlet (2+) | Triplet (0) | Triplet (2+) |
| 12  | 0.529             | 0.017        | 0.127       | 0.106        | 0.620                    | 0.014        | 0.298       | 0.273        |
| 14  | 0.008             | 0.283        | 0.313       | 0.015        | 0.477                    | 0.275        | 0.351       | 0.088        |
| 16  | 0.509             | 0.011        | 0.011       | 0.073        | 0.582                    | 0.008        | 0.294       | 0.229        |
| 18  | 0.025             | 0.234        | 0.268       | 0.028        | 0.417                    | 0.290        | 0.321       | 0.091        |
| 20  | 0.441             | 0.006        | 0.018       | 0.199        | 0.533                    | 0.004        | 0.305       | 0.242        |
| 22  | 0.019             | 0.210        | 0.244       | 0.021        | 0.456                    | 0.276        | 0.308       | 0.169        |
| 24  | 0.378             | 0.020        | 0.015       | 0.172        | 0.493                    | 0.112        | 0.285       | 0.227        |
| 26  | 0.014             | 0.194        | 0.228       | 0.016        | 0.463                    | 0.268        | 0.301       | 0.197        |
| 28  | 0.355             | 0.018        | 0.119       | 0.159        | 0.482                    | 0.199        | 0.294       | 0.221        |
| 30  | 0.179             | 0.185        | 0.220       | 0.012        | 0.467                    | 0.271        | 0.291       | 0.214        |
| 32  | 0.339             | 0.021        | 0.151       | 0.152        | 0.475                    | 0.229        | 0.294       | 0.219        |
| 34  | 0.228             | 0.178        | 0.214       | 0.009        | 0.468                    | 0.270        | 0.299       | 0.224        |
| 36  | 0.328             | 0.009        | 0.164       | 0.146        | 0.472                    | 0.246        | 0.280       | 0.213        |
| 38  | 0.252             | 0.174        | 0.208       | 0.009        | 0.467                    | 0.271        | 0.285       | 0.231        |
| 40  | 0.320             | 0.016        | 0.176       | 0.141        | 0.469                    | 0.259        | 0.280       | 0.210        |
| 42  | 0.267             | 0.169        | 0.197       | 0.006        | 0.467                    | 0.276        | 0.275       | 0.238        |
| 44  | 0.314             | 0.031        | 0.182       | 0.138        | 0.468                    | 0.268        | 0.277       | 0.212        |
| 46  | 0.277             | 0.165        | 0.197       | 0.051        | 0.466                    | 0.278        | 0.272       | 0.244        |
| 48  | 0.309             | 0.006        | 0.177       | 0.135        | 0.467                    | 0.274        | 0.267       | 0.206        |
| 50  | 0.282             | 0.163        | 0.200       | 0.072        | 0.466                    | 0.282        | 0.270       | 0.250        |
| 52  | 0.305             | 0.030        | 0.182       | 0.133        | 0.466                    | 0.281        | 0.264       | 0.206        |
| 54  | 0.286             | 0.159        | 0.186       | 0.086        | 0.465                    | 0.286        | 0.259       | 0.256        |
| 56  | 0.302             | 0.064        | 0.187       | 0.131        | 0.465                    | 0.286        | 0.261       | 0.205        |
| 58  | 0.288             | 0.159        | 0.187       | 0.096        | 0.465                    | 0.290        | 0.259       | 0.199        |
| 60  | 0.300             | 0.035        | 0.177       | 0.129        | 0.464                    | 0.291        | 0.251       | 0.198        |
| 62  | 0.290             | 0.159        | 0.187       | 0.102        | 0.464                    | 0.294        | 0.252       | 0.200        |
| 64  | 0.299             | 0.085        | 0.179       | 0.128        | 0.464                    | 0.295        | 0.247       | 0.197        |
| 66  | 0.291             | 0.154        | 0.178       | 0.107        | 0.464                    | 0.298        | 0.243       | 0.193        |

# AV1245

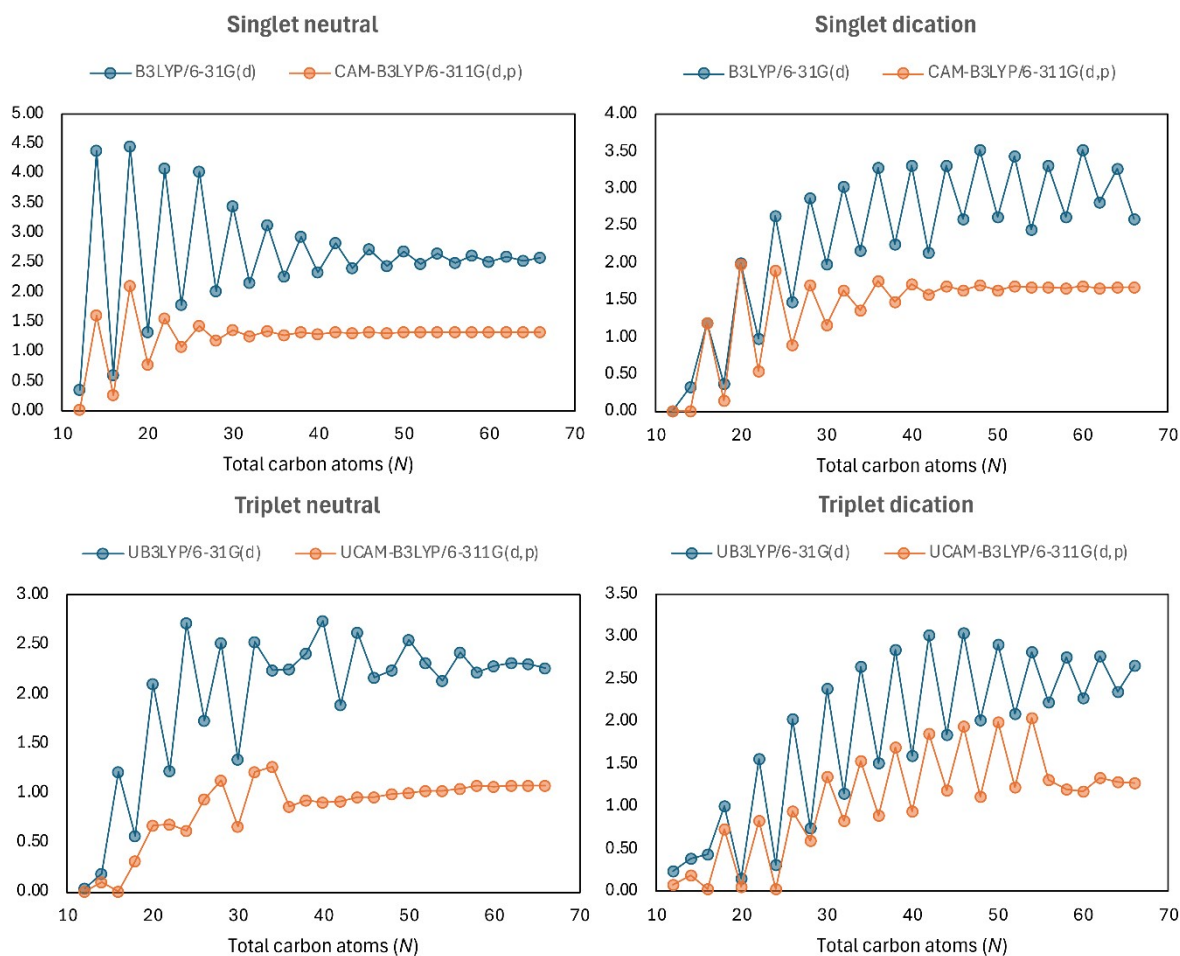

**Figure S13:** The evolution of the electronic index AV1245 of neutral and charged annulenes in the singlet and triplet states ( $N = 12-66$ ) obtained with two different levels of theory with functionals including a different percentage of Hartree Fock exchange: B3LYP (19%) and CAM-B3LYP (19-65%). Note that different scales are used to illustrate better the differences for neutral/charged singlet and triplet annulenes.

**Table S5:** The electronic AV1245 index of the  $[N]$ annulenes ( $N=12-66$ ) with distinct charges and multiplicities obtained using two different level of theory.

| $N$ | (U)B3LYP/6-31G(d) |              |             |              | (U)CAM-B3LYP/6-311G(d,p) |              |             |              |
|-----|-------------------|--------------|-------------|--------------|--------------------------|--------------|-------------|--------------|
|     | Singlet (0)       | Singlet (2+) | Triplet (0) | Triplet (2+) | Singlet (0)              | Singlet (2+) | Triplet (0) | Triplet (2+) |
| 12  | 1.12              | -0.42        | -0.05       | 0.63         | 0.34                     | 0.38         | 0.19        | 0.23         |
| 14  | 4.62              | 1.35         | 0.98        | 0.70         | 1.80                     | 1.06         | 0.89        | 0.53         |
| 16  | 0.99              | 1.45         | 1.53        | 0.91         | 0.58                     | 1.40         | 1.16        | 0.25         |
| 18  | 4.57              | 1.78         | 1.51        | 1.16         | 2.31                     | 1.70         | 1.27        | 0.97         |
| 20  | 1.65              | 2.38         | 2.42        | 0.68         | 1.02                     | 2.29         | 1.57        | 0.53         |
| 22  | 4.41              | 2.31         | 2.07        | 1.79         | 1.84                     | 2.14         | 1.68        | 1.24         |
| 24  | 2.28              | 2.94         | 2.97        | 1.32         | 1.40                     | 2.74         | 2.04        | 0.98         |
| 26  | 4.32              | 2.69         | 2.47        | 2.29         | 1.74                     | 2.45         | 1.95        | 1.47         |
| 28  | 2.51              | 3.24         | 3.10        | 1.81         | 1.52                     | 2.82         | 2.12        | 1.36         |
| 30  | 3.84              | 2.94         | 2.78        | 2.67         | 1.69                     | 2.59         | 2.23        | 1.68         |
| 32  | 2.66              | 3.43         | 3.17        | 2.17         | 1.59                     | 2.87         | 2.24        | 1.62         |
| 34  | 3.54              | 3.12         | 2.93        | 2.94         | 1.68                     | 2.72         | 2.25        | 1.90         |
| 36  | 2.76              | 3.57         | 3.27        | 2.44         | 1.63                     | 2.90         | 2.43        | 1.82         |
| 38  | 3.37              | 3.26         | 3.07        | 3.15         | 1.68                     | 2.80         | 2.42        | 2.07         |
| 40  | 2.83              | 3.66         | 3.30        | 2.66         | 1.65                     | 2.90         | 2.49        | 1.97         |
| 42  | 3.25              | 3.35         | 3.22        | 3.30         | 1.68                     | 2.83         | 2.53        | 2.20         |
| 44  | 2.88              | 3.72         | 3.34        | 2.83         | 1.67                     | 2.91         | 2.55        | 2.07         |
| 46  | 3.18              | 3.43         | 3.27        | 3.37         | 1.68                     | 2.86         | 2.59        | 2.31         |
| 48  | 2.92              | 3.79         | 3.41        | 2.96         | 1.68                     | 2.90         | 2.63        | 2.17         |
| 50  | 3.14              | 3.48         | 3.31        | 3.40         | 1.69                     | 2.87         | 2.63        | 2.38         |
| 52  | 2.95              | 3.82         | 3.43        | 3.07         | 1.68                     | 2.89         | 2.67        | 2.23         |
| 54  | 3.11              | 3.53         | 3.42        | 3.42         | 1.69                     | 2.87         | 2.70        | 2.44         |
| 56  | 2.97              | 3.82         | 3.44        | 3.15         | 1.69                     | 2.88         | 2.71        | 2.29         |
| 58  | 3.09              | 3.56         | 3.45        | 3.44         | 1.69                     | 2.86         | 2.73        | 2.33         |
| 60  | 2.99              | 3.87         | 3.51        | 3.23         | 1.69                     | 2.87         | 2.76        | 2.35         |
| 62  | 3.07              | 3.59         | 3.47        | 3.45         | 1.70                     | 2.85         | 2.77        | 2.36         |
| 64  | 3.00              | 3.83         | 3.52        | 3.28         | 1.70                     | 2.85         | 2.80        | 2.39         |
| 66  | 3.06              | 3.61         | 3.53        | 3.47         | 1.70                     | 2.84         | 2.82        | 2.42         |

$AV_{\min}$

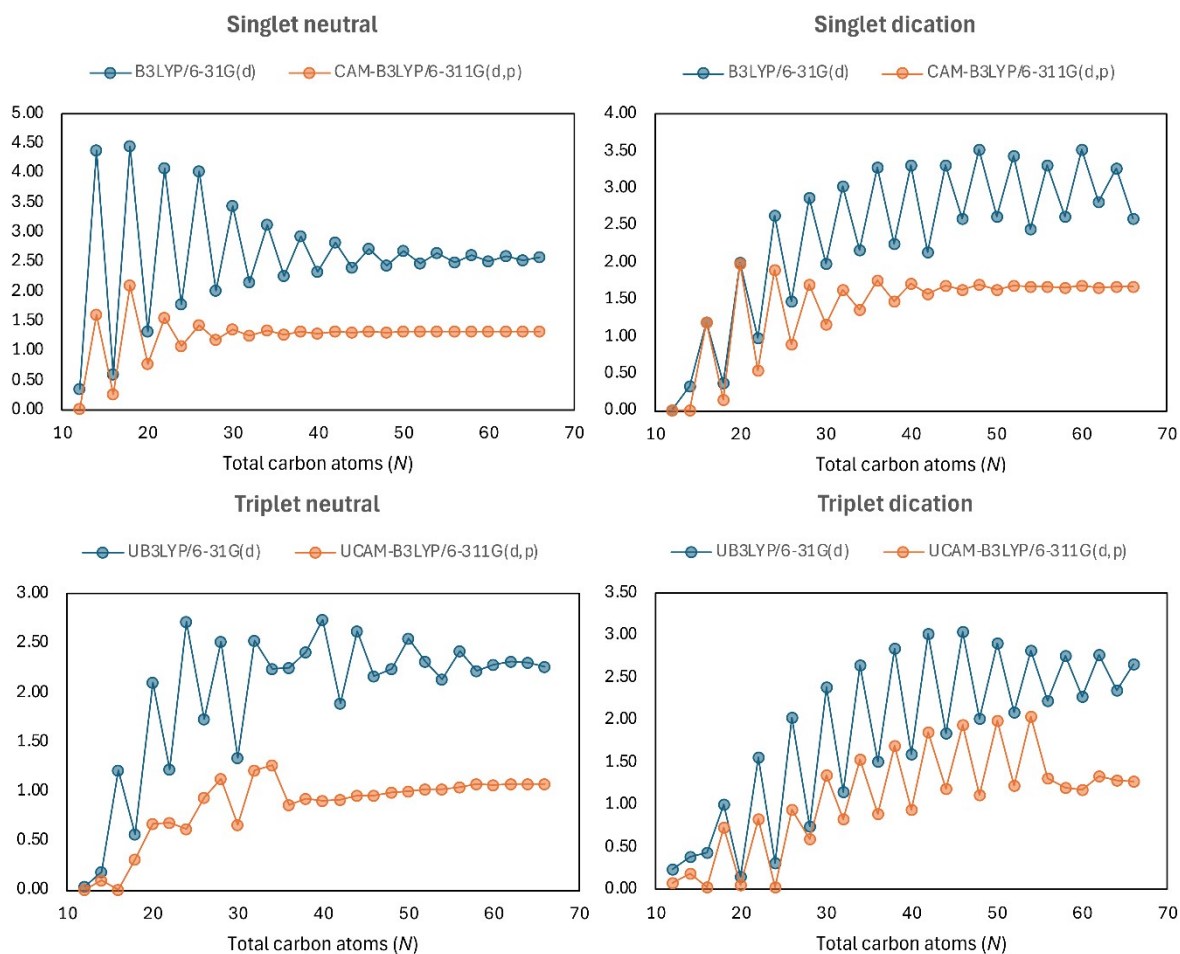

**Figure S14:** The evolution of the electronic index  $AV_{\min}$  of neutral and charged annulenes in the singlet and triplet states ( $N = 12-66$ ) obtained with two different levels of theory with functionals including a different percentage of Hartree Fock exchange: B3LYP (19%) and CAM-B3LYP (19-65%).

**Table S6:** The electronic  $AV_{\min}$  index of the  $[N]$ annulenes ( $N=12-66$ ) with distinct charges and multiplicities obtained using two different level of theory.

| <i>N</i> | (U)B3LYP/6-31G(d) |              |             |              | (U)CAM-B3LYP/6-311G(d,p) |              |             |              |
|----------|-------------------|--------------|-------------|--------------|--------------------------|--------------|-------------|--------------|
|          | Singlet (0)       | Singlet (2+) | Triplet (0) | Triplet (2+) | Singlet (0)              | Singlet (2+) | Triplet (0) | Triplet (2+) |
| 12       | 0.36              | 0.01         | 0.04        | 0.24         | 0.02                     | 0.01         | 0.01        | 0.08         |
| 14       | 4.39              | 0.34         | 0.19        | 0.40         | 1.61                     | 0.01         | 0.10        | 0.20         |
| 16       | 0.61              | 1.19         | 1.21        | 0.44         | 0.27                     | 1.20         | 0.00        | 0.03         |
| 18       | 4.46              | 0.37         | 0.56        | 1.01         | 2.10                     | 0.15         | 0.31        | 0.74         |
| 20       | 1.33              | 2.00         | 2.10        | 0.16         | 0.78                     | 1.99         | 0.67        | 0.06         |
| 22       | 4.08              | 0.99         | 1.23        | 1.56         | 1.55                     | 0.54         | 0.68        | 0.83         |
| 24       | 1.78              | 2.64         | 2.72        | 0.32         | 1.08                     | 1.91         | 0.62        | 0.03         |
| 26       | 4.03              | 1.48         | 1.74        | 2.04         | 1.43                     | 0.90         | 0.94        | 0.95         |
| 28       | 2.01              | 2.87         | 2.51        | 0.75         | 1.18                     | 1.71         | 1.13        | 0.60         |
| 30       | 3.45              | 1.98         | 1.34        | 2.39         | 1.37                     | 1.17         | 0.67        | 1.36         |
| 32       | 2.16              | 3.03         | 2.52        | 1.16         | 1.25                     | 1.63         | 1.22        | 0.83         |
| 34       | 3.12              | 2.17         | 2.24        | 2.65         | 1.34                     | 1.36         | 1.26        | 1.54         |
| 36       | 2.27              | 3.28         | 2.25        | 1.51         | 1.28                     | 1.76         | 0.86        | 0.89         |
| 38       | 2.93              | 2.26         | 2.41        | 2.85         | 1.33                     | 1.48         | 0.92        | 1.70         |
| 40       | 2.34              | 3.32         | 2.74        | 1.61         | 1.30                     | 1.71         | 0.91        | 0.94         |
| 42       | 2.82              | 2.14         | 1.90        | 3.03         | 1.33                     | 1.57         | 0.92        | 1.86         |
| 44       | 2.40              | 3.32         | 2.63        | 1.85         | 1.31                     | 1.69         | 0.96        | 1.19         |
| 46       | 2.73              | 2.59         | 2.17        | 3.05         | 1.33                     | 1.63         | 0.96        | 1.94         |
| 48       | 2.44              | 3.53         | 2.24        | 2.02         | 1.32                     | 1.71         | 0.99        | 1.12         |
| 50       | 2.68              | 2.62         | 2.55        | 2.91         | 1.33                     | 1.63         | 1.00        | 2.00         |
| 52       | 2.47              | 3.44         | 2.31        | 2.10         | 1.32                     | 1.69         | 1.03        | 1.23         |
| 54       | 2.65              | 2.45         | 2.14        | 2.82         | 1.33                     | 1.67         | 1.03        | 2.05         |
| 56       | 2.49              | 3.31         | 2.42        | 2.23         | 1.32                     | 1.68         | 1.05        | 1.31         |
| 58       | 2.62              | 2.62         | 2.22        | 2.76         | 1.33                     | 1.67         | 1.08        | 1.21         |
| 60       | 2.51              | 3.53         | 2.29        | 2.29         | 1.32                     | 1.69         | 1.07        | 1.18         |
| 62       | 2.60              | 2.82         | 2.31        | 2.77         | 1.33                     | 1.66         | 1.07        | 1.34         |
| 64       | 2.52              | 3.27         | 2.31        | 2.36         | 1.33                     | 1.68         | 1.08        | 1.29         |
| 66       | 2.59              | 2.59         | 2.26        | 2.67         | 1.33                     | 1.68         | 1.08        | 1.28         |

## NICS(1)<sub>zz</sub>

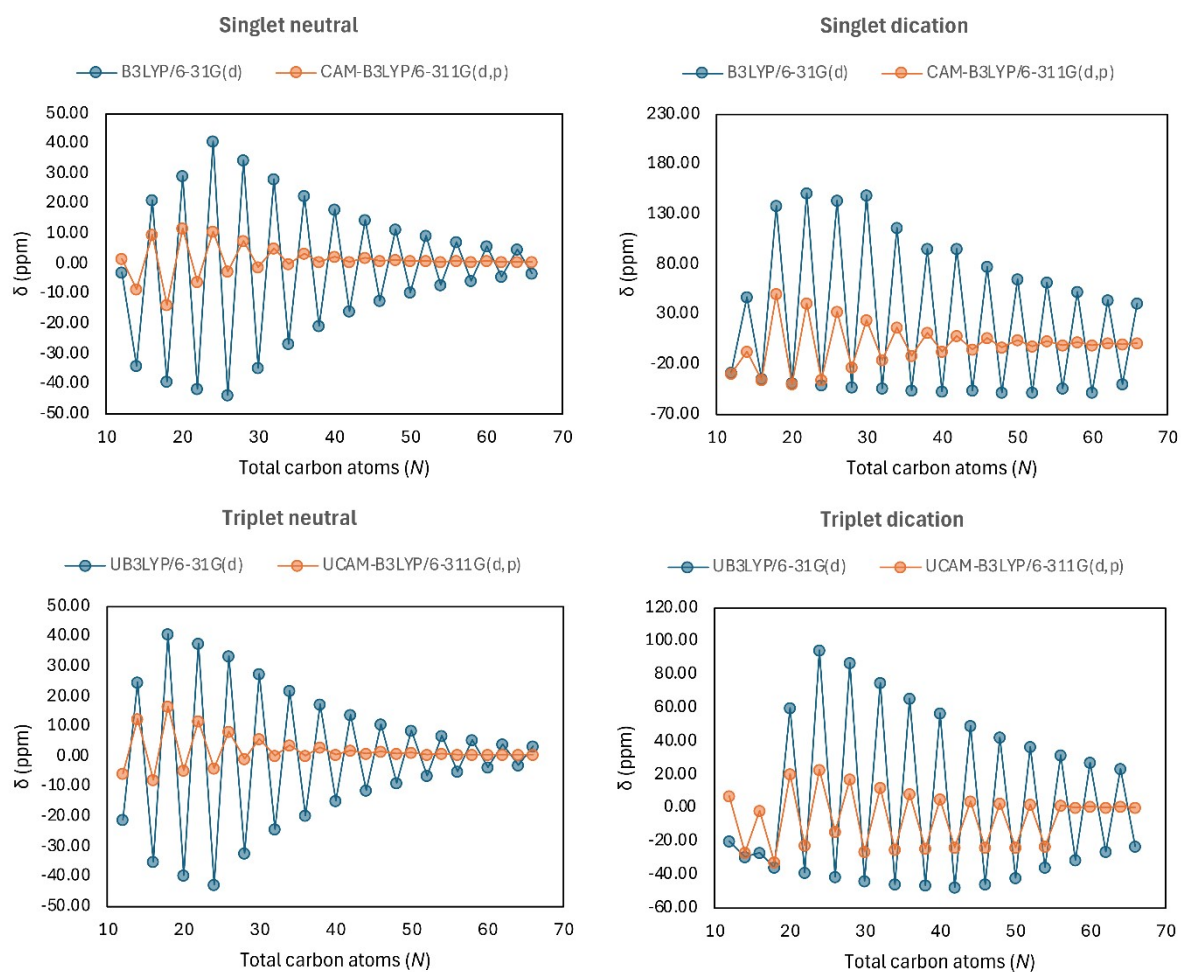

**Figure S15:** The evolution of the magnetic index NICS(1)<sub>zz</sub> (in ppm) of neutral and charged annulenes in the singlet and triplet states ( $N = 12-66$ ) obtained with two different levels of theory with functionals including a different percentage of Hartree Fock exchange: B3LYP (19%) and CAM-B3LYP (19-65%). Note that different scales are used to illustrate better the differences for neutral/charged singlet and triplet annulenes.



**Table S7:** The magnetic NICS(1)<sub>zz</sub> index (ppm) of the [N]annulenes (N=12-66) with distinct charges and multiplicities obtained using two different level of theory.

| N  | (U)B3LYP/6-31G(d) |              |             |              | (U)CAM-B3LYP/6-311G(d,p) |              |             |              |
|----|-------------------|--------------|-------------|--------------|--------------------------|--------------|-------------|--------------|
|    | Singlet (0)       | Singlet (2+) | Triplet (0) | Triplet (2+) | Singlet (0)              | Singlet (2+) | Triplet (0) | Triplet (2+) |
| 12 | -2.94             | -28.19       | -21.10      | -19.54       | 1.61                     | -29.31       | -5.59       | 7.27         |
| 14 | -34.08            | 47.33        | 24.97       | -28.96       | -8.51                    | -7.34        | 12.76       | -26.74       |
| 16 | 21.31             | -34.14       | -35.00      | -26.71       | 9.84                     | -35.06       | -7.84       | -1.44        |
| 18 | -39.05            | 138.62       | 41.05       | -35.43       | -13.50                   | 50.89        | 16.89       | -32.43       |
| 20 | 29.24             | -38.97       | -39.33      | 60.13        | 11.73                    | -39.88       | -4.46       | 20.60        |
| 22 | -41.71            | 151.16       | 37.64       | -38.82       | -5.86                    | 41.09        | 11.91       | -22.21       |
| 24 | 40.81             | -40.66       | -42.50      | 94.80        | 10.79                    | -35.43       | -3.89       | 22.87        |
| 26 | -43.63            | 144.11       | 33.53       | -41.32       | -2.48                    | 32.68        | 8.55        | -14.19       |
| 28 | 34.69             | -42.72       | -32.17      | 87.09        | 7.52                     | -22.77       | -0.84       | 17.70        |
| 30 | -34.58            | 149.47       | 27.62       | -43.71       | -0.98                    | 23.97        | 6.11        | -25.72       |
| 32 | 28.29             | -43.89       | -24.13      | 75.28        | 5.37                     | -15.36       | 0.36        | 12.28        |
| 34 | -26.56            | 116.78       | 21.98       | -45.13       | 0.05                     | 17.17        | 3.95        | -24.63       |
| 36 | 22.53             | -45.90       | -19.61      | 66.14        | 3.53                     | -11.28       | 0.53        | 8.35         |
| 38 | -20.53            | 95.17        | 17.44       | -46.19       | 0.65                     | 12.10        | 2.99        | -23.97       |
| 40 | 18.13             | -46.58       | -14.70      | 56.92        | 2.55                     | -7.16        | 0.85        | 5.80         |
| 42 | -15.83            | 95.33        | 14.00       | -47.12       | 0.76                     | 8.91         | 2.07        | -23.67       |
| 44 | 14.62             | -46.36       | -11.07      | 49.30        | 1.94                     | -4.51        | 0.99        | 4.07         |
| 46 | -12.11            | 78.11        | 11.01       | -45.27       | 0.85                     | 6.17         | 1.59        | -23.42       |
| 48 | 11.60             | -48.19       | -8.57       | 42.83        | 1.43                     | -3.11        | 0.90        | 2.84         |
| 50 | -9.34             | 65.13        | 8.71        | -41.45       | 0.87                     | 4.31         | 1.29        | -23.23       |
| 52 | 9.27              | -47.52       | -6.43       | 37.01        | 1.15                     | -1.81        | 0.86        | 2.06         |
| 54 | -7.15             | 61.92        | 6.92        | -35.64       | 0.78                     | 3.28         | 1.01        | -22.99       |
| 56 | 7.42              | -43.63       | -4.71       | 32.06        | 0.97                     | -0.99        | 0.81        | 1.55         |
| 58 | -5.48             | 53.01        | 5.44        | -30.72       | 0.72                     | 2.31         | 0.85        | 0.25         |
| 60 | 5.96              | -47.51       | -3.63       | 27.75        | 0.85                     | -0.55        | 0.70        | 1.16         |
| 62 | -4.17             | 44.74        | 4.29        | -26.20       | 0.67                     | 1.67         | 0.75        | 0.38         |
| 64 | 4.68              | -39.12       | -2.67       | 23.95        | 0.68                     | -0.19        | 0.64        | 0.91         |
| 66 | -3.16             | 41.07        | 3.39        | -22.58       | 0.59                     | 1.33         | 0.63        | 0.40         |

## GIMIC

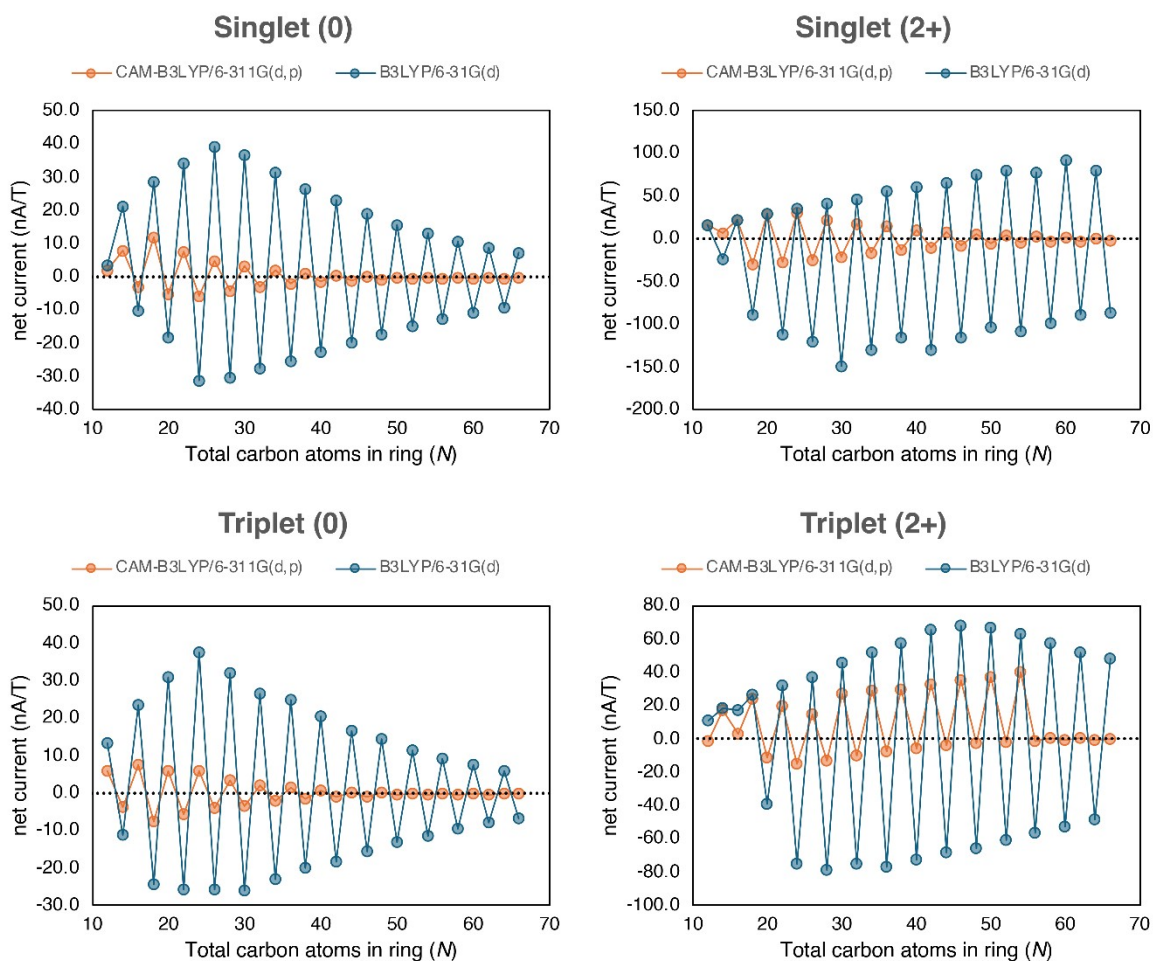

**Figure S16:** The evolution of the net ring current strength (in nA/T) from GIMIC calculations of neutral and charged annulenes in the singlet and triplet states ( $N = 12-66$ ) obtained with two different levels of theory with functionals including a different percentage of Hartree Fock exchange: B3LYP (19%) and CAM-B3LYP (19-65%). Note that different scales are used to illustrate better the differences for neutral/charged singlet and triplet annulenes.

**Table S8:** The net ring current strength (in nA/T) from GIMIC calculations of the  $[N]$ annulenes ( $N=12-66$ ) with distinct charges and multiplicities, obtained using two different level of theory.

| $N$ | (U)B3LYP/6-31G(d) |              |             |              | (U)CAM-B3LYP/6-311G(d,p) |              |             |              |
|-----|-------------------|--------------|-------------|--------------|--------------------------|--------------|-------------|--------------|
|     | Singlet (0)       | Singlet (2+) | Triplet (0) | Triplet (2+) | Singlet (0)              | Singlet (2+) | Triplet (0) | Triplet (2+) |
| 12  | 3.6               | 16.1         | 13.3        | 10.9         | 2.1                      | 16.6         | 5.9         | -1.2         |
| 14  | 21.1              | -23.3        | -11.1       | 18.3         | 7.8                      | 6.4          | -3.8        | 17.1         |
| 16  | -10.1             | 22.3         | 23.6        | 17.2         | -3.0                     | 22.6         | 7.5         | 3.0          |
| 18  | 28.7              | -88.0        | -24.5       | 26.3         | 12.0                     | -29.1        | -7.7        | 24.1         |
| 20  | -18.1             | 29.5         | 31.0        | -38.9        | -5.0                     | 29.5         | 6.0         | -11.3        |
| 22  | 34.3              | -111.6       | -25.8       | 32.1         | 7.5                      | -27.1        | -5.6        | 19.5         |
| 24  | -31.2             | 35.9         | 37.5        | -75.2        | -5.7                     | 31.2         | 6.0         | -15.2        |
| 26  | 39.2              | -120.0       | -25.9       | 37.3         | 4.9                      | -24.1        | -4.0        | 14.5         |
| 28  | -30.3             | 41.8         | 32.0        | -78.7        | -4.3                     | 23.0         | 3.3         | -13.3        |
| 30  | 36.8              | -148.3       | -26.2       | 45.9         | 3.2                      | -20.9        | -3.6        | 27.2         |
| 32  | -27.4             | 46.9         | 26.5        | -75.3        | -3.0                     | 17.5         | 2.0         | -9.8         |
| 34  | 31.5              | -129.1       | -23.1       | 52.1         | 2.0                      | -16.5        | -2.2        | 28.7         |
| 36  | -25.3             | 55.7         | 24.8        | -76.7        | -2.1                     | 14.7         | 1.4         | -7.5         |
| 38  | 26.6              | -115.3       | -19.9       | 57.7         | 1.2                      | -12.6        | -1.6        | 29.9         |
| 40  | -22.4             | 61.7         | 20.4        | -72.4        | -1.5                     | 10.6         | 0.6         | -5.5         |
| 42  | 23.0              | -129.5       | -18.3       | 65.7         | 0.6                      | -10.1        | -1.1        | 33.0         |
| 44  | -19.6             | 66.2         | 16.7        | -68.0        | -1.0                     | 7.6          | 0.2         | -3.8         |
| 46  | 19.1              | -115.2       | -15.5       | 68.3         | 0.3                      | -7.4         | -0.9        | 35.1         |
| 48  | -17.2             | 75.6         | 14.3        | -65.6        | -0.8                     | 6.2          | 0.1         | -2.8         |
| 50  | 15.8              | -103.5       | -13.0       | 66.9         | 0.0                      | -5.4         | -0.6        | 37.2         |
| 52  | -14.8             | 80.2         | 11.5        | -61.0        | -0.6                     | 4.1          | -0.1        | -2.0         |
| 54  | 13.2              | -107.2       | -11.5       | 62.8         | -0.2                     | -4.2         | -0.5        | 39.9         |
| 56  | -12.7             | 78.5         | 9.1         | -56.3        | -0.5                     | 2.8          | -0.2        | -1.4         |
| 58  | 10.8              | -98.0        | -9.6        | 57.7         | -0.2                     | -3.1         | -0.5        | 0.6          |
| 60  | -10.7             | 92.1         | 7.6         | -52.9        | -0.4                     | 2.2          | -0.2        | -1.0         |
| 62  | 8.8               | -88.1        | -8.0        | 52.2         | -0.2                     | -2.3         | -0.4        | 0.3          |
| 64  | -9.1              | 80.6         | 5.9         | -48.5        | -0.4                     | 1.3          | -0.3        | -0.8         |
| 66  | 7.2               | -86.6        | -6.9        | 48.3         | -0.3                     | -1.7         | -0.3        | 0.1          |

## Relative hardness

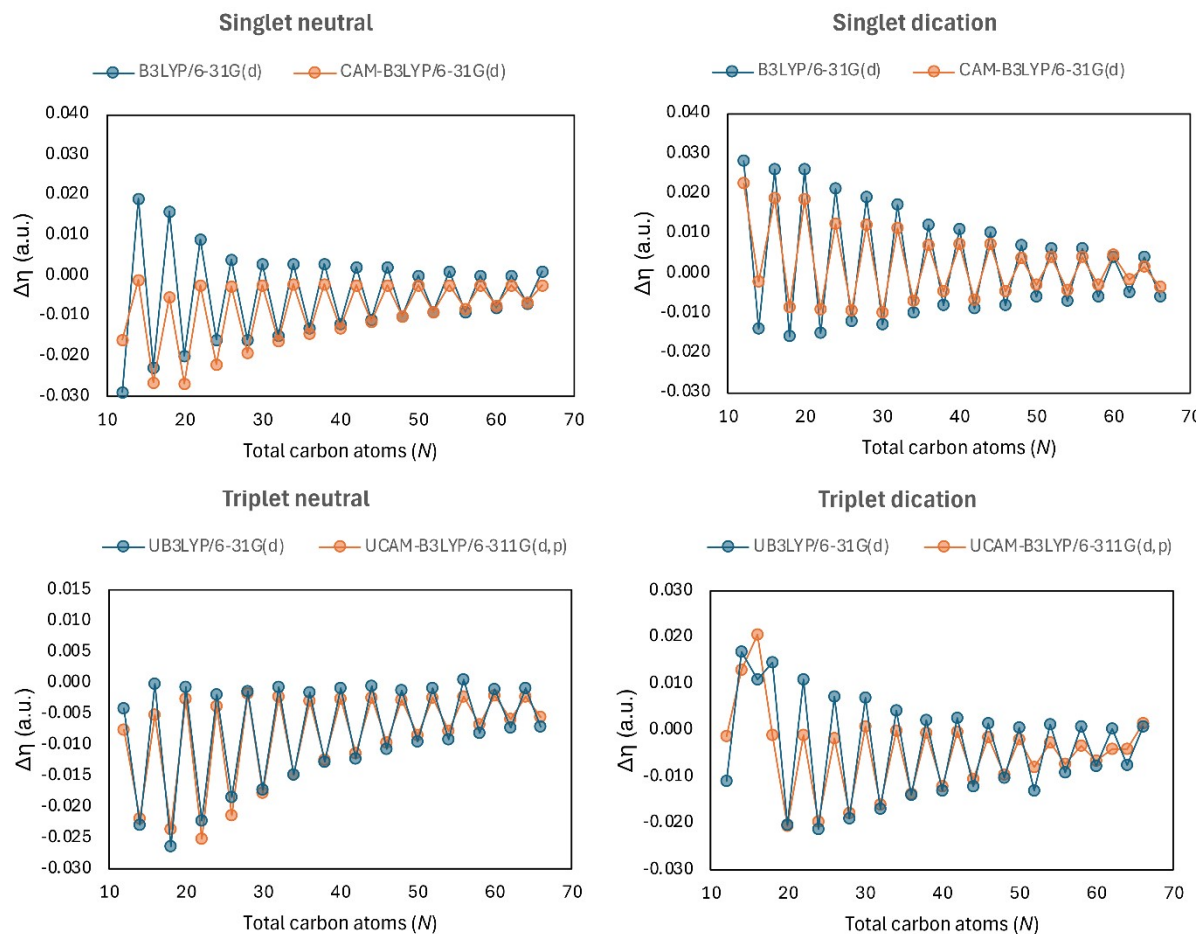

**Figure S17:** The evolution of the reactivity index  $\Delta\eta$  (in hartrees) of neutral and charged annulenes in the singlet and triplet states ( $N = 12-66$ ) obtained with two different levels of theory with functionals including a different percentage of Hartree Fock exchange: B3LYP (19%) and CAM-B3LYP (19-65%). Note that different scales are used to illustrate better the differences for neutral/charged singlet and triplet annulenes.

**Table S9:** The relative hardness (in hartrees) of the  $[N]$ annulenes ( $N = 12-66$ ) with distinct charges and multiplicities obtained using two different level of theory.

| $N$ | (U)B3LYP/6-31G(d) |              |             |              | (U)CAM-B3LYP/6-31G(d) |              |             |              |
|-----|-------------------|--------------|-------------|--------------|-----------------------|--------------|-------------|--------------|
|     | Singlet (0)       | Singlet (2+) | Triplet (0) | Triplet (2+) | Singlet (0)           | Singlet (2+) | Triplet (0) | Triplet (2+) |
| 12  | -0.029            | 0.028        | -0.004      | -0.011       | -0.016                | 0.022        | -0.008      | -0.001       |
| 14  | 0.019             | -0.014       | -0.023      | 0.017        | -0.001                | -0.002       | -0.022      | 0.013        |
| 16  | -0.023            | 0.026        | 0.000       | 0.011        | -0.027                | 0.019        | -0.005      | 0.020        |
| 18  | 0.016             | -0.016       | -0.026      | 0.014        | -0.005                | -0.009       | -0.024      | -0.001       |
| 20  | -0.020            | 0.026        | -0.001      | -0.020       | -0.027                | 0.018        | -0.003      | -0.021       |
| 22  | 0.009             | -0.015       | -0.022      | 0.011        | -0.002                | -0.009       | -0.025      | -0.001       |
| 24  | -0.016            | 0.021        | -0.002      | -0.021       | -0.022                | 0.012        | -0.004      | -0.020       |
| 26  | 0.004             | -0.012       | -0.018      | 0.007        | -0.003                | -0.009       | -0.021      | -0.002       |
| 28  | -0.016            | 0.019        | -0.001      | -0.019       | -0.019                | 0.012        | -0.002      | -0.018       |
| 30  | 0.003             | -0.013       | -0.017      | 0.007        | -0.003                | -0.010       | -0.018      | 0.001        |
| 32  | -0.015            | 0.017        | -0.001      | -0.017       | -0.016                | 0.011        | -0.002      | -0.016       |
| 34  | 0.003             | -0.010       | -0.015      | 0.004        | -0.002                | -0.007       | -0.015      | 0.000        |
| 36  | -0.013            | 0.012        | -0.002      | -0.014       | -0.014                | 0.007        | -0.003      | -0.014       |
| 38  | 0.003             | -0.008       | -0.013      | 0.002        | -0.002                | -0.005       | -0.012      | -0.001       |
| 40  | -0.012            | 0.011        | -0.001      | -0.013       | -0.013                | 0.007        | -0.003      | -0.012       |
| 42  | 0.002             | -0.009       | -0.012      | 0.003        | -0.003                | -0.007       | -0.011      | 0.000        |
| 44  | -0.011            | 0.010        | -0.001      | -0.012       | -0.011                | 0.007        | -0.002      | -0.011       |
| 46  | 0.002             | -0.008       | -0.011      | 0.001        | -0.002                | -0.005       | -0.010      | -0.002       |
| 48  | -0.010            | 0.007        | -0.001      | -0.010       | -0.010                | 0.004        | -0.003      | -0.010       |
| 50  | 0.000             | -0.006       | -0.010      | 0.001        | -0.002                | -0.003       | -0.008      | -0.002       |
| 52  | -0.009            | 0.006        | -0.001      | -0.013       | -0.009                | 0.004        | -0.002      | -0.008       |
| 54  | 0.001             | -0.007       | -0.009      | 0.001        | -0.002                | -0.004       | -0.008      | -0.003       |
| 56  | -0.009            | 0.006        | 0.000       | -0.009       | -0.008                | 0.004        | -0.002      | -0.007       |
| 58  | 0.000             | -0.006       | -0.008      | 0.001        | -0.002                | -0.003       | -0.007      | -0.003       |
| 60  | -0.008            | 0.004        | -0.001      | -0.008       | -0.007                | 0.004        | -0.002      | -0.007       |
| 62  | 0.000             | -0.005       | -0.007      | 0.000        | -0.002                | -0.002       | -0.006      | -0.004       |
| 64  | -0.007            | 0.004        | -0.001      | -0.008       | -0.007                | 0.002        | -0.002      | -0.004       |
| 66  | 0.001             | -0.006       | -0.007      | 0.001        | -0.002                | -0.003       | -0.006      | 0.002        |

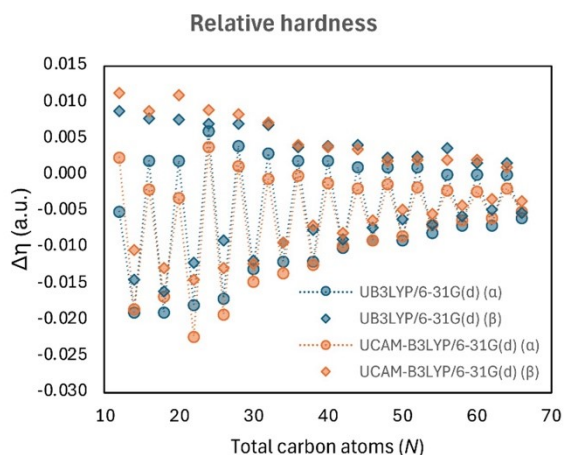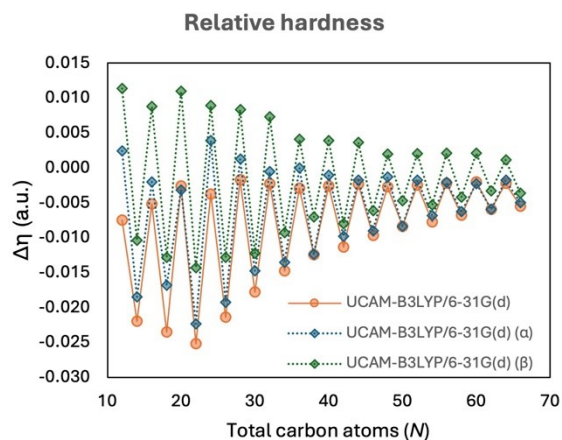

**Figure S18:** The relative hardness of the triplet neutral  $[N]$ annulenes ( $N=12-66$ ) computed considering the frontier orbital energies of the  $\alpha$ - and  $\beta$ -electrons.

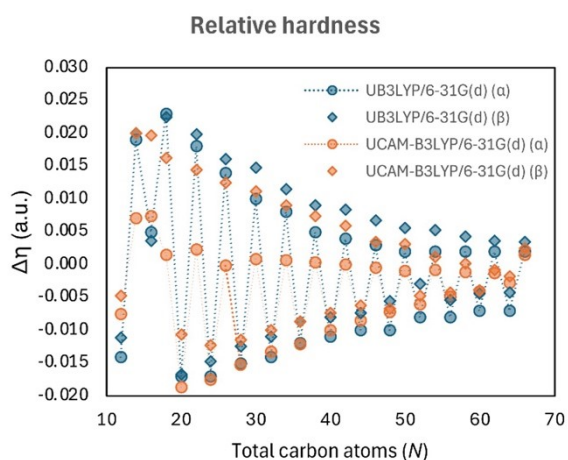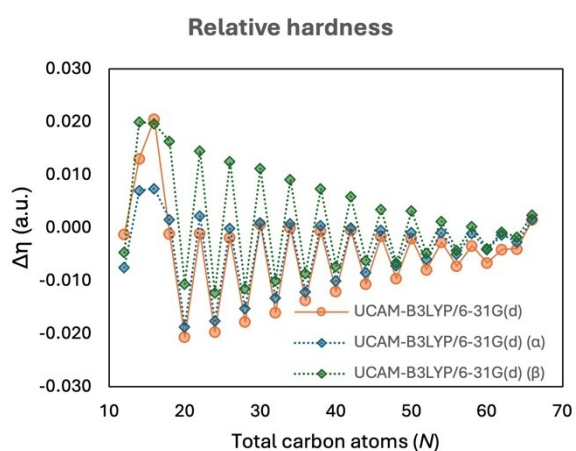

**Figure S19:** The relative hardness of the triplet charged  $[N]$ annulenes ( $N = 12-66$ ) computed considering the frontier orbital energies of the  $\alpha$ - and  $\beta$ -electrons as well as different levels of theory.

## Error in the QTAIM integrations

**Table S10:** The error and the total Laplacian of the QTAIM integrations at the (U)B3LYP/6-31G(d) level of theory provided by the ESI-3D calculations.

| N  | (U)B3LYP/6-31G(d) |           |              |           |             |           |              |           |
|----|-------------------|-----------|--------------|-----------|-------------|-----------|--------------|-----------|
|    | Singlet (0)       |           | Singlet (2+) |           | Triplet (0) |           | Triplet (2+) |           |
|    | Error(S)          | Laplacian | Error(S)     | Laplacian | Error(S)    | Laplacian | Error(S)     | Laplacian |
| 12 | 0.0031            | 0.0020    | 0.0050       | 0.0018    | 0.0054      | 0.0019    | 0.0060       | 0.0016    |
| 14 | 0.0019            | 0.0014    | 0.0044       | 0.0011    | 0.0068      | 0.0016    | 0.0034       | 0.0014    |
| 16 | 0.0032            | 0.0018    | 0.0052       | 0.0017    | 0.0049      | 0.0015    | 0.0108       | 0.0037    |
| 18 | 0.0020            | 0.0017    | 0.0050       | 0.0017    | 0.0051      | 0.0018    | 0.0031       | 0.0008    |
| 20 | 0.0056            | 0.0024    | 0.0094       | 0.0032    | 0.0052      | 0.0016    | 0.0095       | 0.0029    |
| 22 | 0.0034            | 0.0021    | 0.0062       | 0.0018    | 0.0053      | 0.0019    | 0.0047       | 0.0016    |
| 24 | 0.0034            | 0.0023    | 0.0067       | 0.0023    | 0.0077      | 0.0020    | 0.0060       | 0.0018    |
| 26 | 0.0042            | 0.0024    | 0.0067       | 0.0025    | 0.0088      | 0.0023    | 0.0069       | 0.0020    |
| 28 | 0.0047            | 0.0021    | 0.0077       | 0.0021    | 0.0096      | 0.0019    | 0.0105       | 0.0026    |
| 30 | 0.0055            | 0.0025    | 0.0115       | 0.0034    | 0.0125      | 0.0030    | 0.0104       | 0.0027    |
| 32 | 0.0114            | 0.0037    | 0.0209       | 0.0046    | 0.0214      | 0.0048    | 0.0198       | 0.0040    |
| 34 | 0.0110            | 0.0054    | 0.0125       | 0.0034    | 0.0209      | 0.0059    | 0.0194       | 0.0060    |
| 36 | 0.0066            | 0.0030    | 0.0124       | 0.0029    | 0.0106      | 0.0021    | 0.0150       | 0.0033    |
| 38 | 0.0080            | 0.0042    | 0.0186       | 0.0039    | 0.0159      | 0.0043    | 0.0137       | 0.0035    |
| 40 | 0.0082            | 0.0036    | 0.0145       | 0.0030    | 0.0129      | 0.0028    | 0.0153       | 0.0036    |
| 42 | 0.0083            | 0.0036    | 0.0185       | 0.0044    | 0.0150      | 0.0032    | 0.0169       | 0.0040    |
| 44 | 0.0091            | 0.0037    | 0.0159       | 0.0034    | 0.0192      | 0.0045    | 0.0181       | 0.0036    |
| 46 | 0.0094            | 0.0039    | 0.0183       | 0.0043    | 0.0183      | 0.0034    | 0.0176       | 0.0034    |
| 48 | 0.0103            | 0.0037    | 0.0190       | 0.0037    | 0.0206      | 0.0041    | 0.0208       | 0.0034    |
| 50 | 0.0099            | 0.0035    | 0.0183       | 0.0040    | 0.0219      | 0.0042    | 0.0208       | 0.0041    |
| 52 | 0.0113            | 0.0043    | 0.0216       | 0.0043    | 0.0229      | 0.0039    | 0.0281       | 0.0051    |
| 54 | 0.0118            | 0.0045    | 0.0228       | 0.0041    | 0.0226      | 0.0044    | 0.0216       | 0.0047    |
| 56 | 0.0126            | 0.0047    | 0.0220       | 0.0040    | 0.0288      | 0.0053    | 0.0245       | 0.0045    |
| 58 | 0.0121            | 0.0045    | 0.0266       | 0.0049    | 0.0263      | 0.0047    | 0.0242       | 0.0047    |
| 60 | 0.0148            | 0.0051    | 0.0246       | 0.0050    | 0.0252      | 0.0044    | 0.0253       | 0.0042    |
| 62 | 0.0142            | 0.0053    | 0.0270       | 0.0051    | 0.0285      | 0.0048    | 0.0288       | 0.0053    |
| 64 | 0.0167            | 0.0056    | 0.0279       | 0.0057    | 0.0267      | 0.0048    | 0.0319       | 0.0055    |
| 66 | 0.0165            | 0.0063    | 0.0259       | 0.0047    | 0.0302      | 0.0047    | 0.0309       | 0.0052    |

**Table S11:** The error and the total Laplacian of the QTAIM integrations at the (U)CAM-B3LYP/6-311G(d,p) level of theory provided by the ESI-3D calculations.

| N  | (U)CAM-B3LYP/6-311G(d,p) |           |              |           |             |           |              |           |
|----|--------------------------|-----------|--------------|-----------|-------------|-----------|--------------|-----------|
|    | Singlet (0)              |           | Singlet (2+) |           | Triplet (0) |           | Triplet (2+) |           |
|    | Error(S)                 | Laplacian | Error(S)     | Laplacian | Error(S)    | Laplacian | Error(S)     | Laplacian |
| 12 | 0.0032                   | 0.0019    | 0.0024       | 0.0022    | 0.0046      | 0.0017    | 0.0030       | 0.0013    |
| 14 | 0.0028                   | 0.0020    | 0.0043       | 0.0018    | 0.0065      | 0.0021    | 0.0073       | 0.0018    |
| 16 | 0.0042                   | 0.0025    | 0.0040       | 0.0020    | 0.0082      | 0.0022    | 0.0095       | 0.0025    |
| 18 | 0.0021                   | 0.0014    | 0.0030       | 0.0019    | 0.0059      | 0.0017    | 0.0037       | 0.0014    |
| 20 | 0.0040                   | 0.0032    | 0.0045       | 0.0025    | 0.0103      | 0.0026    | 0.0102       | 0.0028    |
| 22 | 0.0034                   | 0.0020    | 0.0034       | 0.0016    | 0.0084      | 0.0027    | 0.0073       | 0.0020    |
| 24 | 0.0047                   | 0.0027    | 0.0041       | 0.0022    | 0.0072      | 0.0021    | 0.0089       | 0.0023    |
| 26 | 0.0047                   | 0.0024    | 0.0061       | 0.0030    | 0.0131      | 0.0028    | 0.0093       | 0.0023    |
| 28 | 0.0057                   | 0.0027    | 0.0066       | 0.0028    | 0.0111      | 0.0029    | 0.0093       | 0.0025    |
| 30 | 0.0060                   | 0.0028    | 0.0071       | 0.0037    | 0.0126      | 0.0028    | 0.0110       | 0.0025    |
| 32 | 0.0078                   | 0.0030    | 0.0154       | 0.0044    | 0.0125      | 0.0029    | 0.0120       | 0.0028    |
| 34 | 0.0121                   | 0.0048    | 0.0079       | 0.0038    | 0.0264      | 0.0062    | 0.0149       | 0.0032    |
| 36 | 0.0079                   | 0.0035    | 0.0069       | 0.0028    | 0.0123      | 0.0033    | 0.0145       | 0.0028    |
| 38 | 0.0104                   | 0.0043    | 0.0079       | 0.0032    | 0.0186      | 0.0037    | 0.0147       | 0.0031    |
| 40 | 0.0095                   | 0.0037    | 0.0066       | 0.0032    | 0.0173      | 0.0036    | 0.0156       | 0.0037    |
| 42 | 0.0105                   | 0.0040    | 0.0078       | 0.0032    | 0.0172      | 0.0033    | 0.0170       | 0.0036    |
| 44 | 0.0121                   | 0.0043    | 0.0091       | 0.0041    | 0.0201      | 0.0041    | 0.0181       | 0.0036    |
| 46 | 0.0114                   | 0.0039    | 0.0105       | 0.0048    | 0.0189      | 0.0042    | 0.0192       | 0.0036    |
| 48 | 0.0135                   | 0.0048    | 0.0102       | 0.0037    | 0.0211      | 0.0036    | 0.0222       | 0.0045    |
| 50 | 0.0136                   | 0.0044    | 0.0113       | 0.0043    | 0.0248      | 0.0044    | 0.0220       | 0.0040    |
| 52 | 0.0135                   | 0.0049    | 0.0124       | 0.0044    | 0.0255      | 0.0048    | 0.0264       | 0.0047    |
| 54 | 0.0140                   | 0.0049    | 0.0129       | 0.0044    | 0.0250      | 0.0047    | 0.0244       | 0.0046    |
| 56 | 0.0149                   | 0.0047    | 0.0127       | 0.0046    | 0.0289      | 0.0051    | 0.0327       | 0.0051    |
| 58 | 0.0137                   | 0.0045    | 0.0142       | 0.0049    | 0.0281      | 0.0045    | 0.0284       | 0.0054    |
| 60 | 0.0197                   | 0.0059    | 0.0152       | 0.0053    | 0.0276      | 0.0050    | 0.0316       | 0.0052    |
| 62 | 0.0190                   | 0.0057    | 0.0157       | 0.0058    | 0.0293      | 0.0041    | 0.0336       | 0.0050    |
| 64 | 0.0209                   | 0.0065    | 0.0183       | 0.0061    | 0.0292      | 0.0056    | 0.0331       | 0.0051    |
| 66 | 0.0197                   | 0.0061    | 0.0171       | 0.0054    | 0.0330      | 0.0048    | 0.0334       | 0.0050    |



## Correlation plots between the B3LYP and CAM-B3LYP indices of aromaticity

**Table S12:** Correlation coefficients ( $R^2$ ) between the aromaticity indices computed using B3LYP and CAM-B3LYP for all the [N]annulenes with  $N = 12-66$  (112 systems).  $R^2 > 0.60$  are indicated in green.

| index                 | $R^2$ |
|-----------------------|-------|
| HOMA                  | 0.60  |
| BLA                   | 0.51  |
| FLU                   | 0.58  |
| BOA                   | 0.50  |
| AV1245                | 0.68  |
| AV <sub>min</sub>     | 0.75  |
| GIMIC                 | 0.50  |
| NICS(1) <sub>zz</sub> | 0.60  |
| $\Delta\eta$          | 0.81  |
| ASE                   | 0.59  |

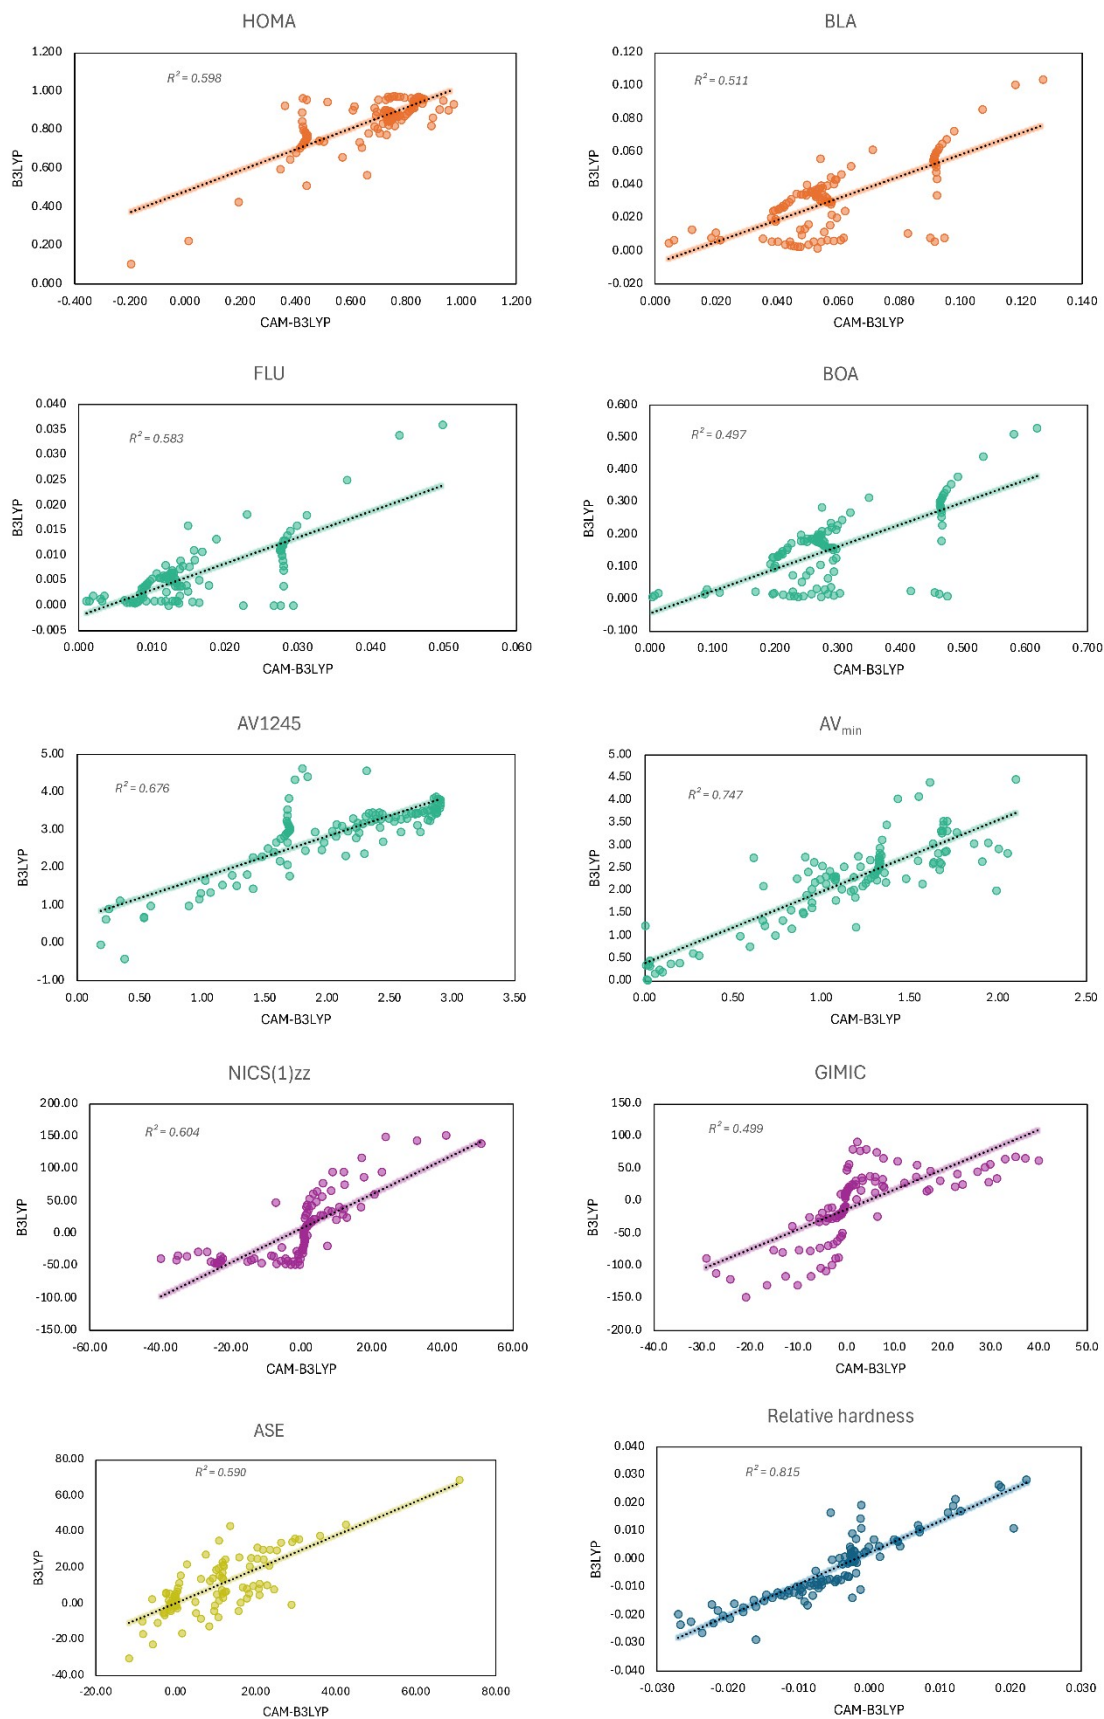

**Figure S20:** The correlation plots between the aromaticity indices evolution of the neutral and charged [N]annulenes in the singlet and triplet states (N = 12-66) computed with B3LYP and CAM-B3LYP (112 systems).

## B3LYP aromaticity results

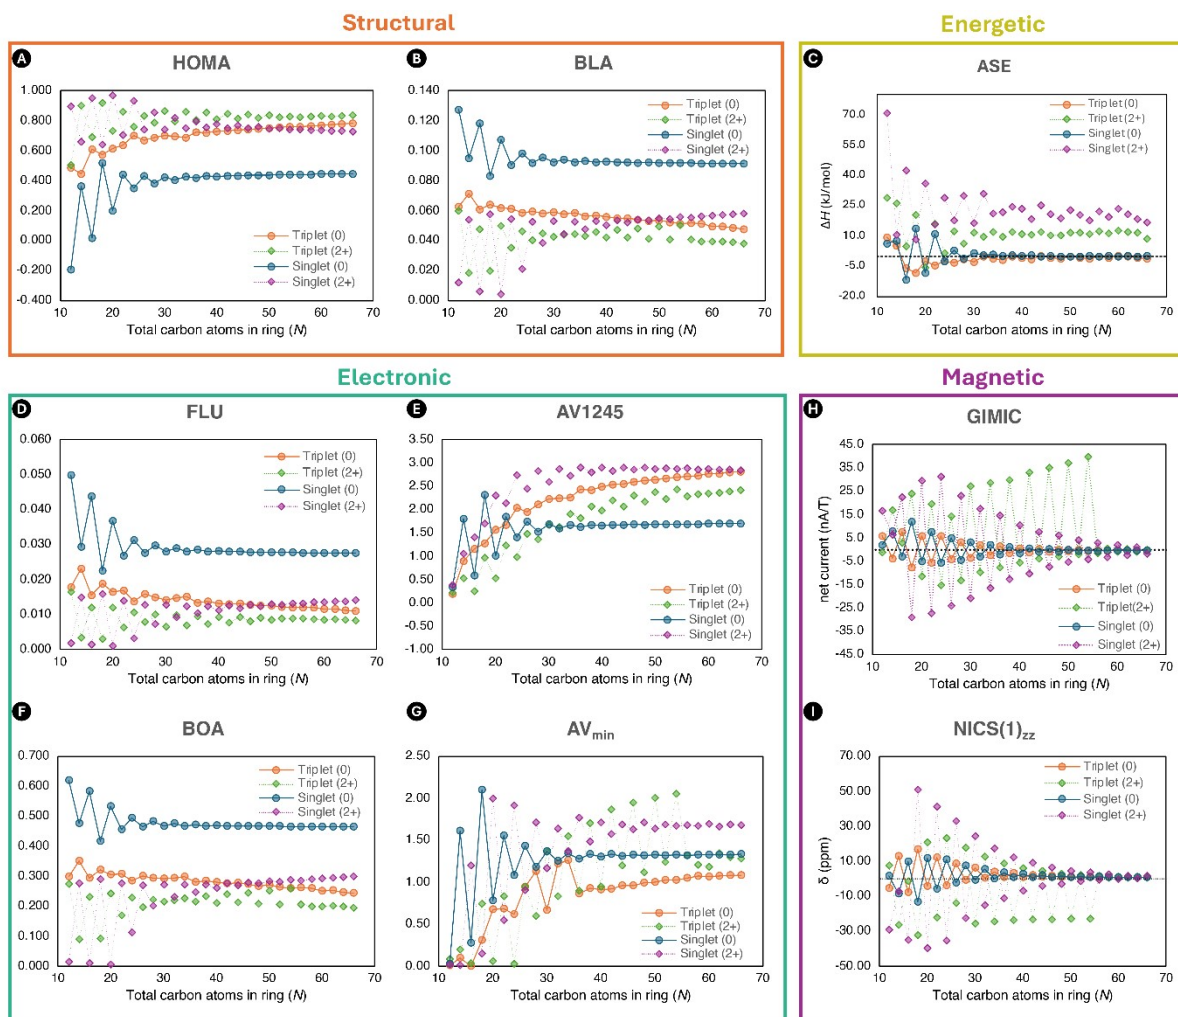

**Figure S21:** The evolution of selected aromaticity descriptors rooted in distinct criteria structural (A,B), energetic (C), electronic (D-G), and magnetic (H,I) of the neutral and charged [ $N$ ]annulenes in the singlet and triplet states ( $N = 12-66$ ) computed using the B3LYP/6-31G(d) level of theory.

## Relative hardness

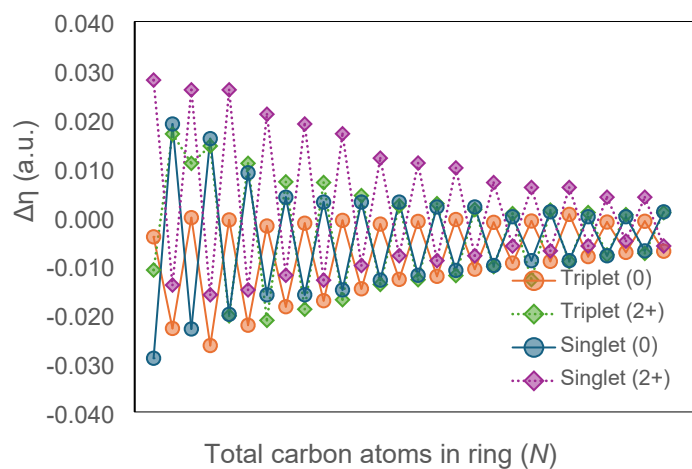

**Figure S22:** The relative hardness of the neutral and charged [N]annulenes ( $N = 12-66$ ) computed with the B3LYP/6-31G(d) level of theory.

### Spin density

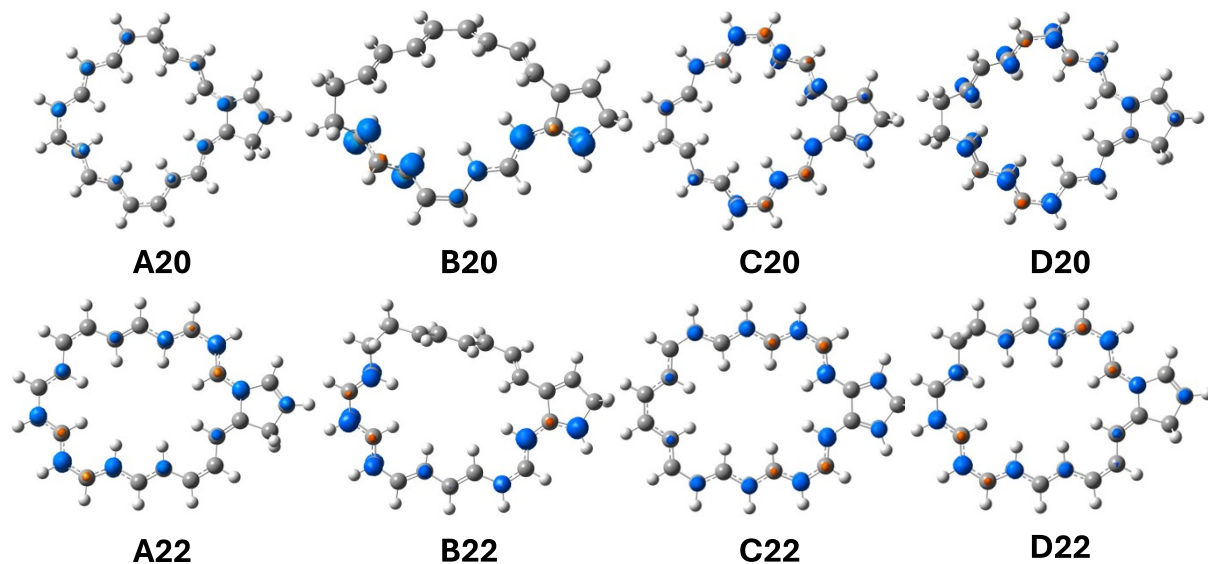

**Figure S23:** The spin densities of the structures employed in the ISE<sub>II</sub> method. The [20]- and [22]annulenes are presented as examples to illustrate the spin density locations within the molecule (isovalue: 0.015). All structures are triplet neutral species (B3LYP/6-31G(d)).

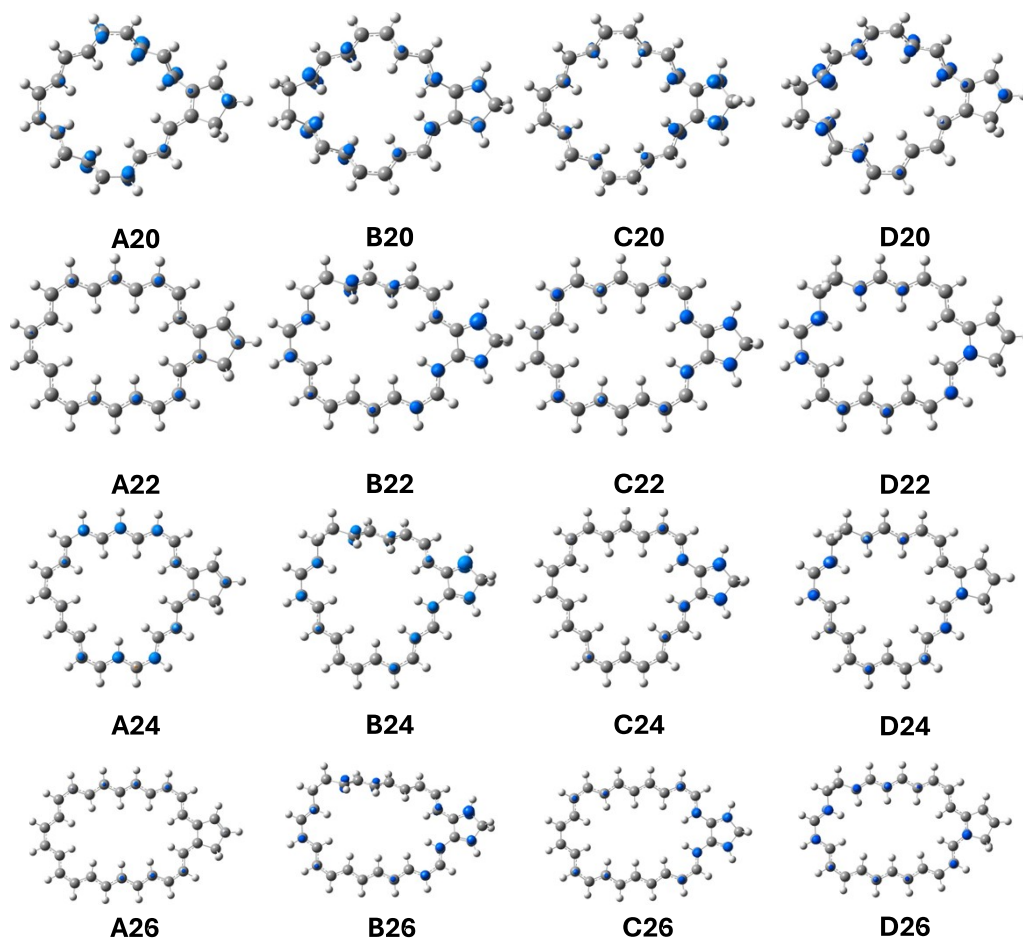

**Figure S24:** The spin densities of the structures employed in the ISE<sub>II</sub> method for the [20]-, [22]-, [24]-, and [26]annulenes are presented to illustrate their respective locations within the molecule (isovalue: 0.015). All structures are triplet dicationic species (B3LYP/6-31G(d)).

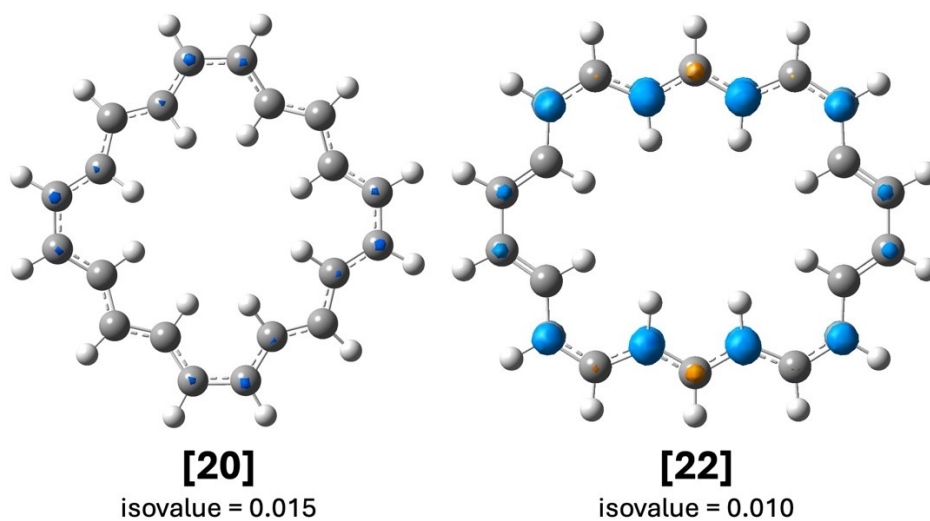

**Figure S25:** The spin density of the neutral triplet [20]- and [22]annulenes (B3LYP/6-31G(d)).

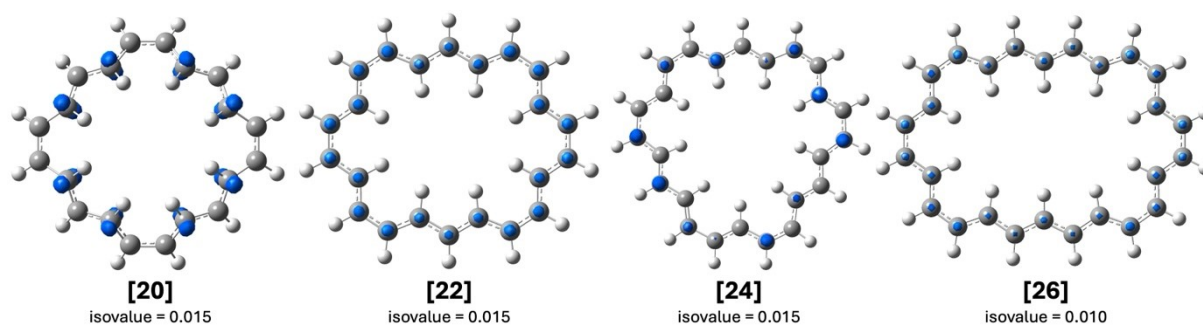

**Figure S26:** The spin density of the triplet dicationic [20]-, [22]-, [24]-, and [26]annulenes (B3LYP/6-31G(d)).

## EDDB<sub>norm</sub> results

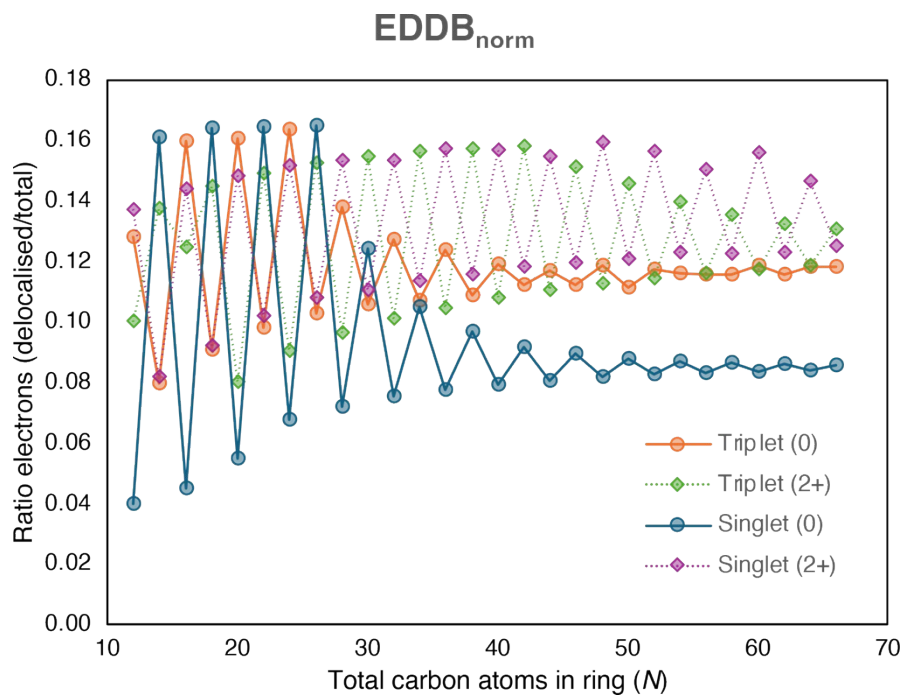

**Figure S27:** The evolution of EDDB<sub>norm</sub> index of the neutral and charged [ $N$ ]annulenes in the singlet and triplet states ( $N=12-66$ ). EDDB<sub>norm</sub> is the ratio of the delocalised electrons and the total amount of electrons in the system (B3LYP/6-31G(d)).

**Table S13:** The  $EDDB_{norm}$  values, corresponding to the ratio of the total amount of delocalised electrons and the total amount of electrons in the system (delocalised/total).

| <i>N</i> | $EDDB_{norm}$ (delocalised/total) |              |             |              |
|----------|-----------------------------------|--------------|-------------|--------------|
|          | Triplet (0)                       | Triplet (2+) | Singlet (0) | Singlet (2+) |
| 12       | 0.1280                            | 0.1001       | 0.0400      | 0.1370       |
| 14       | 0.0799                            | 0.1374       | 0.1610      | 0.0821       |
| 16       | 0.1597                            | 0.1248       | 0.0453      | 0.1438       |
| 18       | 0.0907                            | 0.1448       | 0.1639      | 0.0922       |
| 20       | 0.1606                            | 0.0800       | 0.0551      | 0.1483       |
| 22       | 0.0981                            | 0.1492       | 0.1643      | 0.1020       |
| 24       | 0.1637                            | 0.0904       | 0.0677      | 0.1515       |
| 26       | 0.1028                            | 0.1524       | 0.1649      | 0.1079       |
| 28       | 0.1381                            | 0.0964       | 0.0722      | 0.1531       |
| 30       | 0.1058                            | 0.1548       | 0.1241      | 0.1107       |
| 32       | 0.1274                            | 0.1011       | 0.0753      | 0.1535       |
| 34       | 0.1072                            | 0.1563       | 0.1050      | 0.1135       |
| 36       | 0.1236                            | 0.1048       | 0.0776      | 0.1571       |
| 38       | 0.1089                            | 0.1572       | 0.0967      | 0.1158       |
| 40       | 0.1191                            | 0.1081       | 0.0794      | 0.1567       |
| 42       | 0.1123                            | 0.1582       | 0.0918      | 0.1183       |
| 44       | 0.1172                            | 0.1104       | 0.0808      | 0.1547       |
| 46       | 0.1123                            | 0.1510       | 0.0894      | 0.1196       |
| 48       | 0.1187                            | 0.1129       | 0.0818      | 0.1595       |
| 50       | 0.1115                            | 0.1456       | 0.0881      | 0.1208       |
| 52       | 0.1172                            | 0.1146       | 0.0826      | 0.1561       |
| 54       | 0.1159                            | 0.1396       | 0.0871      | 0.1228       |
| 56       | 0.1158                            | 0.1160       | 0.0832      | 0.1502       |
| 58       | 0.1158                            | 0.1356       | 0.0866      | 0.1227       |
| 60       | 0.1188                            | 0.1175       | 0.0837      | 0.1560       |
| 62       | 0.1156                            | 0.1324       | 0.0862      | 0.1231       |
| 64       | 0.1182                            | 0.1185       | 0.0841      | 0.1465       |
| 66       | 0.1184                            | 0.1305       | 0.0859      | 0.1249       |



## EDDB visualisation

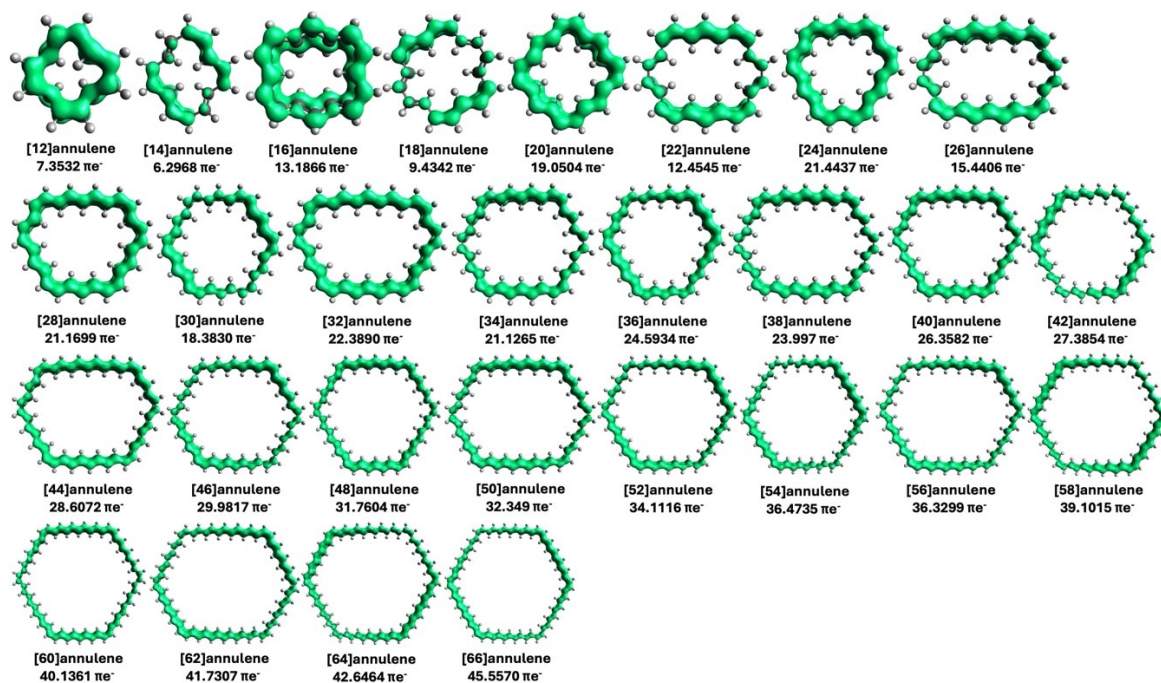

**Figure S28:** Visualisation of the electron density of delocalised  $\pi$ -electrons of the neutral triplet  $[N]$ annulenes determined by the EDDB software (B3LYP/6-31G(d)). Figures were generated with the Avogadro program (isovalue: 0.015).

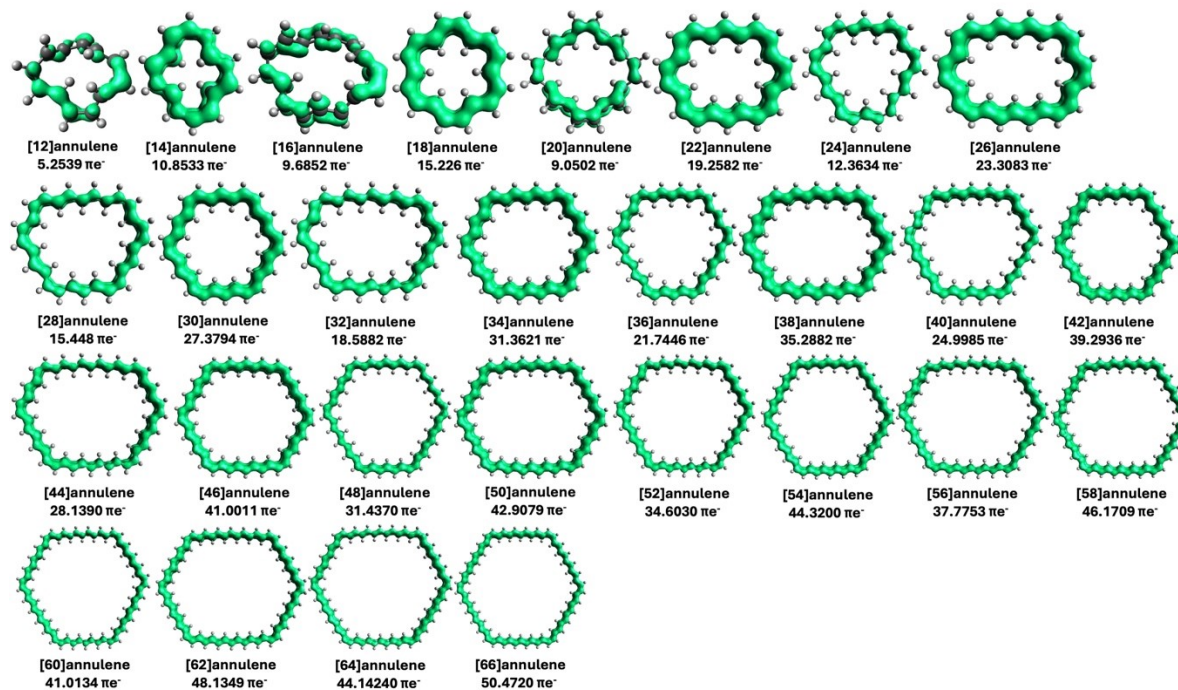

**Figure S29:** Visualisation of the electron density of delocalised  $\pi$ -electrons of the triplet dicationic  $[N]$ annulenes determined by the EDDB software (B3LYP/6-31G(d)). Figures were generated with the Avogadro program (isovalue: 0.015).

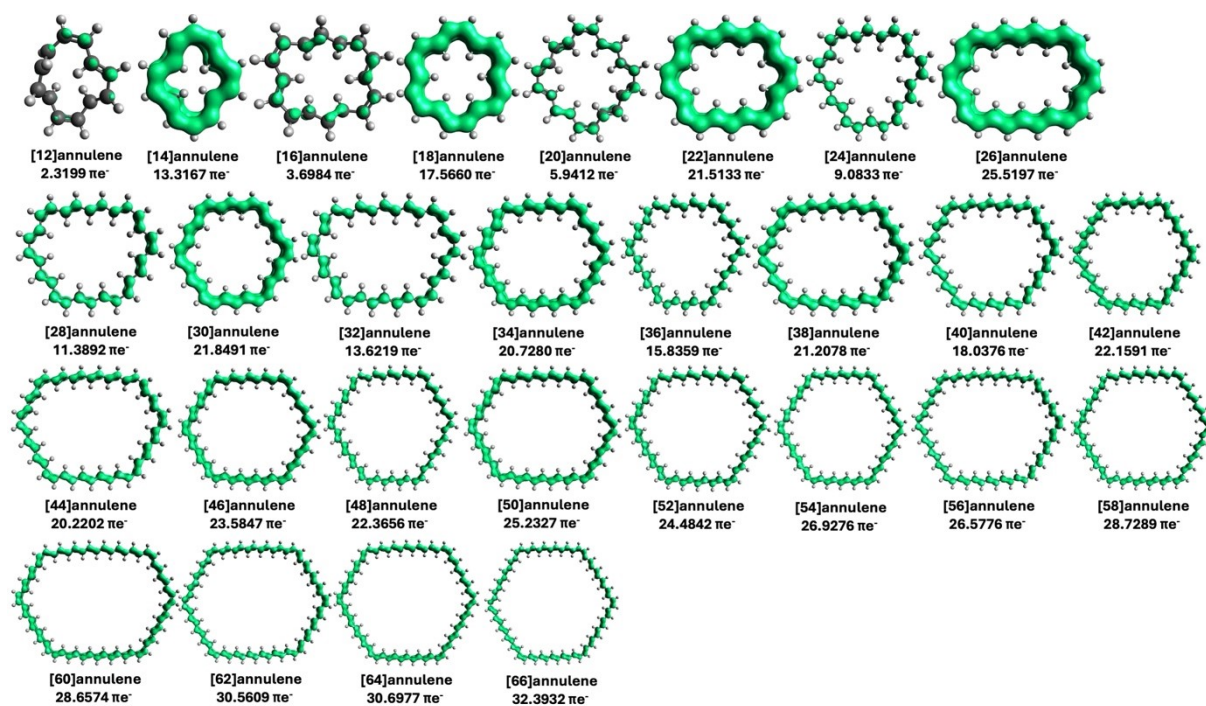

**Figure S30:** Visualisation of the electron density of delocalised  $\pi$ -electrons of the neutral singlet  $[N]$ annulenes determined by the EDDB software (B3LYP/6-31G(d)). Figures were generated with the Avogadro program (isovalue: 0.015).

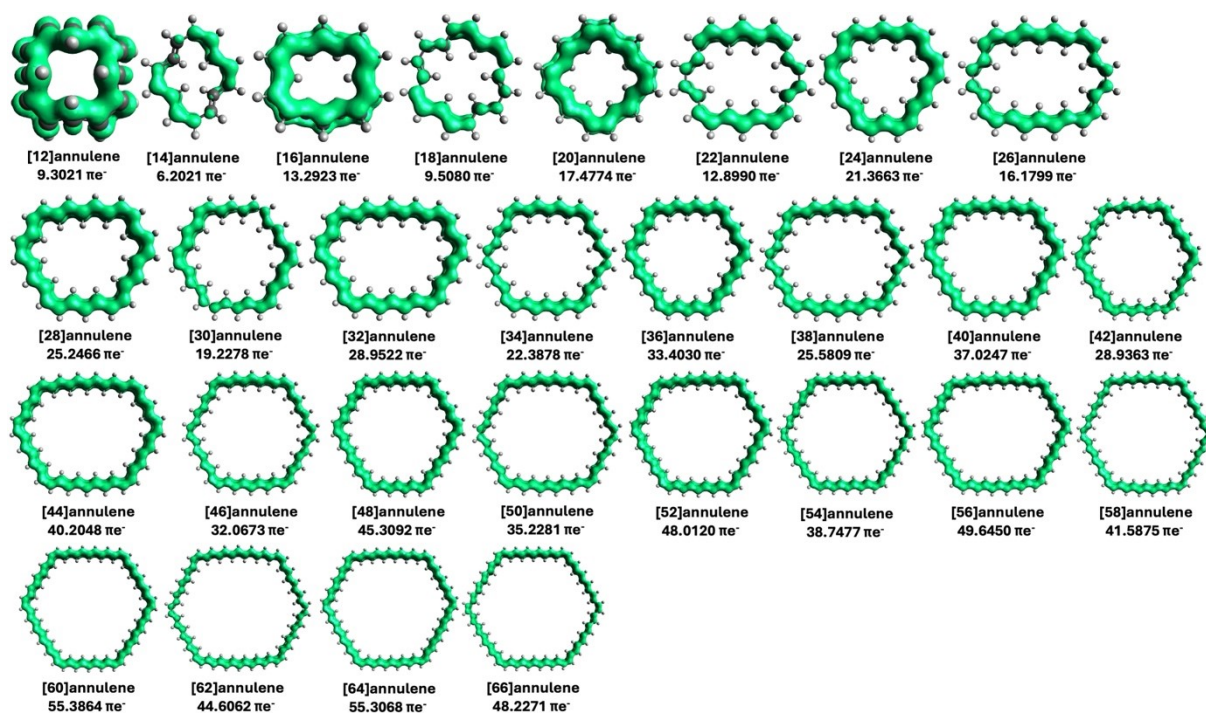

**Figure S31:** Visualisation of the electron density of delocalised  $\pi$ -electrons of the singlet dicationic  $[N]$ annulenes determined by the EDDB software (B3LYP/6-31G(d)). Figures were generated with the Avogadro program (isovalue: 0.015).

## Aromatic stabilisation energy results of the [N]annulenes

**Table S14:** The aromatic stabilisation energy for the neutral triplet annulenes (UB3LYP/6-31G(d)). The EE and ZPVE of the **B** and **D** geometries were obtained from the supporting information of ref. [26].

| Triplet (0) | A <sub>Triplet</sub> | B <sub>singlet</sub> | C <sub>Triplet</sub> | D <sub>Singlet</sub> | ASE                  |
|-------------|----------------------|----------------------|----------------------|----------------------|----------------------|
| N           | EE+ZPVE (Hartree)    | EE+ZPVE (Hartree)    | EE+ZPVE (Hartree)    | EE+ZPVE (Hartree)    | (C+D)-(A+B) (kJ/mol) |
| 12          | -579.578429          | -581.00744           | -579.567969          | -581.0124            | 14.44                |
| 14          | -657.00881           | -658.195294          | -657.00698           | -658.199063          | -5.09                |
| 16          | -734.365018          | -735.86909           | -734.355442          | -735.87761           | 2.77                 |
| 18          | -811.777827          | -812.962504          | -811.774288          | -812.972397          | -16.68               |
| 20          | -889.130864          | -890.70503           | -889.118353          | -890.71528           | 5.94                 |
| 22          | -966.535757          | -967.712696          | -966.528091          | -967.724267          | -10.25               |
| 24          | -1043.920368         | -1045.5518           | -1043.904319         | -1045.56548          | 6.22                 |
| 26          | -1121.290506         | -1122.462569         | -1121.280299         | -1122.474671         | -4.98                |
| 28          | -1198.671841         | -1199.836657         | -1198.65641          | -1199.849834         | 5.92                 |
| 30          | -1276.043573         | -1277.211923         | -1276.033154         | -1277.224258         | -5.03                |
| 32          | -1353.422861         | -1354.58551          | -1353.407637         | -1354.598925         | 4.75                 |
| 34          | -1430.795684         | -1431.96073          | -1430.784031         | -1431.973484         | -2.89                |
| 36          | -1508.173444         | -1509.335025         | -1508.159325         | -1509.348374         | 2.02                 |
| 38          | -1585.547131         | -1586.7095           | -1585.534459         | -1586.722525         | -0.93                |
| 40          | -1662.923896         | -1664.083788         | -1662.909676         | -1664.097243         | 2.01                 |
| 42          | -1740.297674         | -1741.458114         | -1740.285072         | -1741.47136          | -1.69                |
| 44          | -1817.674172         | -1818.832465         | -1817.659809         | -1818.84602          | 2.12                 |
| 46          | -1895.04826          | -1896.206834         | -1895.035065         | -1896.220233         | -0.54                |
| 48          | -1972.423971         | -1973.581144         | -1972.410172         | -1973.59475          | 0.51                 |
| 50          | -2049.798588         | -2050.955485         | -2049.784925         | -2050.968995         | 0.40                 |
| 52          | -2127.17397          | -2128.32979          | -2127.159976         | -2128.343472         | 0.82                 |
| 54          | -2204.548428         | -2205.704138         | -2204.535056         | -2205.717716         | -0.54                |
| 56          | -2281.923866         | -2283.078476         | -2281.909684         | -2283.092193         | 1.22                 |
| 58          | -2359.298393         | -2360.452793         | -2359.284704         | -2360.466449         | 0.09                 |
| 60          | -2436.673414         | -2437.827096         | -2436.659649         | -2437.840871         | -0.03                |
| 62          | -2514.04824          | -2515.201456         | -2514.034299         | -2515.215158         | 0.63                 |
| 64          | -2591.423156         | -2592.575758         | -2591.409209         | -2592.589529         | 0.46                 |
| 66          | -2668.797769         | -2669.95006          | -2668.784125         | -2669.963798         | -0.25                |

**Table S15:** The aromatic stabilisation energy for the triplet dicationic annulenes (UB3LYP/6-31G(d)). The EE and ZPVE of the **B** and **D** geometries were obtained from the supporting information of ref. [26].

| Triplet (2+) | A <sub>triplet charged</sub> | B <sub>singlet neutral</sub> | C <sub>triplet charged</sub> | D <sub>singlet neutral</sub> | ASE                  |
|--------------|------------------------------|------------------------------|------------------------------|------------------------------|----------------------|
| N            | EE+ZPVE (Hartree)            | EE+ZPVE (Hartree)            | EE+ZPVE (Hartree)            | EE+ZPVE (Hartree)            | (C+D)-(A+B) (kJ/mol) |
| 12           | -578.961141                  | -581.00744                   | -578.956286                  | -581.0124                    | -0.28                |
| 14           | -656.430638                  | -658.195294                  | -656.413916                  | -658.199063                  | 34.01                |
| 16           | -733.796551                  | -735.86909                   | -733.78762                   | -735.87761                   | 1.08                 |
| 18           | -811.239436                  | -812.962504                  | -811.217566                  | -812.972397                  | 31.45                |
| 20           | -888.589043                  | -890.70503                   | -888.587297                  | -890.71528                   | -22.33               |
| 22           | -966.024068                  | -967.712696                  | -966.00252                   | -967.724267                  | 26.19                |
| 24           | -1043.402317                 | -1045.5518                   | -1043.394813                 | -1045.56548                  | -16.22               |
| 26           | -1120.79995                  | -1122.462569                 | -1120.778344                 | -1122.474671                 | 24.95                |
| 28           | -1198.177655                 | -1199.836657                 | -1198.167506                 | -1199.849834                 | -7.95                |
| 30           | -1275.572515                 | -1277.211923                 | -1275.55126                  | -1277.224258                 | 23.42                |
| 32           | -1352.947377                 | -1354.58551                  | -1352.935401                 | -1354.598925                 | -3.78                |
| 34           | -1430.339376                 | -1431.96073                  | -1430.318266                 | -1431.973484                 | 21.94                |
| 36           | -1507.714653                 | -1509.335025                 | -1507.701532                 | -1509.348374                 | -0.60                |
| 38           | -1585.103023                 | -1586.7095                   | -1585.081995                 | -1586.722525                 | 21.01                |
| 40           | -1662.47823                  | -1664.083788                 | -1662.464067                 | -1664.097243                 | 1.86                 |
| 42           | -1739.864973                 | -1741.458114                 | -1739.844113                 | -1741.47136                  | 19.99                |
| 44           | -1817.239417                 | -1818.832465                 | -1817.22446                  | -1818.84602                  | 3.68                 |
| 46           | -1894.624571                 | -1896.206834                 | -1894.603981                 | -1896.220233                 | 18.88                |
| 48           | -1971.999439                 | -1973.581144                 | -1971.983751                 | -1973.59475                  | 5.47                 |
| 50           | -2049.382425                 | -2050.955485                 | -2049.362265                 | -2050.968995                 | 17.46                |
| 52           | -2126.75734                  | -2128.32979                  | -2126.741453                 | -2128.343472                 | 5.79                 |
| 54           | -2204.13932                  | -2205.704138                 | -2204.119721                 | -2205.717716                 | 15.81                |
| 56           | -2281.514272                 | -2283.078476                 | -2281.498037                 | -2283.092193                 | 6.61                 |
| 58           | -2358.895168                 | -2360.452793                 | -2358.875916                 | -2360.466449                 | 14.69                |
| 60           | -2436.270315                 | -2437.827096                 | -2436.253873                 | -2437.840871                 | 7.00                 |
| 62           | -2513.65021                  | -2515.201456                 | -2513.631214                 | -2515.215158                 | 13.90                |
| 64           | -2591.025588                 | -2592.575758                 | -2591.008855                 | -2592.589529                 | 7.78                 |
| 66           | -2668.404665                 | -2669.95006                  | -2668.386027                 | -2669.963798                 | 12.86                |

**Table S16:** The aromatic stabilisation energy for the closed-shell dicationic annulenes (B3LYP/6-31G(d)). The EE and ZPVE of the **B** and **D** geometries were obtained from the supporting information of ref. [26].

| Singlet (2+) | A <sub>Singlet Charged</sub> | B <sub>Singlet Neutral</sub> | C <sub>Singlet Charged</sub> | D <sub>Singlet Neutral</sub> | ASE                  |
|--------------|------------------------------|------------------------------|------------------------------|------------------------------|----------------------|
| <i>N</i>     | EE+ZPVE (Hartree)            | EE+ZPVE (Hartree)            | EE+ZPVE (Hartree)            | EE+ZPVE (Hartree)            | (C+D)-(A+B) (kJ/mol) |
| 12           | -578.999126                  | -581.00744                   | -578.967908                  | -581.0124                    | 68.94                |
| 14           | -656.439729                  | -658.195294                  | -656.438707                  | -658.199063                  | -7.21                |
| 16           | -733.82673                   | -735.86909                   | -733.801399                  | -735.87761                   | 44.14                |
| 18           | -811.243405                  | -812.962504                  | -811.238155                  | -812.972397                  | -12.19               |
| 20           | -888.622917                  | -890.70503                   | -888.598198                  | -890.71528                   | 37.99                |
| 22           | -966.028137                  | -967.712696                  | -966.018012                  | -967.724267                  | -3.80                |
| 24           | -1043.431801                 | -1045.5518                   | -1043.404962                 | -1045.56548                  | 34.55                |
| 26           | -1120.803803                 | -1122.462569                 | -1120.790546                 | -1122.474671                 | 3.03                 |
| 28           | -1198.202894                 | -1199.836657                 | -1198.175781                 | -1199.849834                 | 36.59                |
| 30           | -1275.575697                 | -1277.211923                 | -1275.563011                 | -1277.224258                 | 0.92                 |
| 32           | -1352.969278                 | -1354.58551                  | -1352.942141                 | -1354.598925                 | 36.03                |
| 34           | -1430.342262                 | -1431.96073                  | -1430.327638                 | -1431.973484                 | 4.91                 |
| 36           | -1507.733788                 | -1509.335025                 | -1507.708868                 | -1509.348374                 | 30.38                |
| 38           | -1585.105631                 | -1586.7095                   | -1585.089479                 | -1586.722525                 | 8.21                 |
| 40           | -1662.494895                 | -1664.083788                 | -1662.469957                 | -1664.097243                 | 30.15                |
| 42           | -1739.86706                  | -1741.458114                 | -1739.851516                 | -1741.47136                  | 6.03                 |
| 44           | -1817.253978                 | -1818.832465                 | -1817.229091                 | -1818.84602                  | 29.75                |
| 46           | -1894.626402                 | -1896.206834                 | -1894.609772                 | -1896.220233                 | 8.48                 |
| 48           | -1972.011999                 | -1973.581144                 | -1971.98857                  | -1973.59475                  | 25.79                |
| 50           | -2049.384226                 | -2050.955485                 | -2049.366701                 | -2050.968995                 | 10.54                |
| 52           | -2126.768437                 | -2128.32979                  | -2126.74509                  | -2128.343472                 | 25.38                |
| 54           | -2204.14097                  | -2205.704138                 | -2204.124109                 | -2205.717716                 | 8.62                 |
| 56           | -2281.523793                 | -2283.078476                 | -2281.500602                 | -2283.092193                 | 24.87                |
| 58           | -2358.896714                 | -2360.452793                 | -2358.879193                 | -2360.466449                 | 10.15                |
| 60           | -2436.278578                 | -2437.827096                 | -2436.256662                 | -2437.840871                 | 21.37                |
| 62           | -2513.651569                 | -2515.201456                 | -2513.633514                 | -2515.215158                 | 11.43                |
| 64           | -2591.032476                 | -2592.575758                 | -2591.010737                 | -2592.589529                 | 20.92                |
| 66           | -2668.405692                 | -2669.95006                  | -2668.388349                 | -2669.963798                 | 9.46                 |

**Table S17:** The aromatic stabilisation energy for the closed-shell neutral annulenes (B3LYP/6-31G(d)). The geometries were optimised without any constraints and do not contain imaginary frequencies.

| Singlet (0) | A                    | B                    | C                    | D                    | ASE                  |
|-------------|----------------------|----------------------|----------------------|----------------------|----------------------|
| N           | EE+ZPEC<br>(Hartree) | EE+ZPEC<br>(Hartree) | EE+ZPEC<br>(Hartree) | EE+ZPEC<br>(Hartree) | (C+D)-(A+B) (kJ/mol) |
| 12          | -579.614483          | -580.832116          | -579.607647          | -580.833682          | 13.84                |
| 14          | -657.050448          | -658.224014          | -657.035656          | -658.228362          | 27.42                |
| 16          | -734.379855          | -735.580202          | -734.381804          | -735.589802          | -30.32               |
| 18          | -811.815412          | -812.977433          | -811.791917          | -812.984442          | 43.28                |
| 20          | -889.141833          | -890.332792          | -889.139935          | -890.338317          | -9.52                |
| 22          | -966.564865          | -967.726611          | -966.542652          | -967.735346          | 35.39                |
| 24          | -1043.928241         | -1045.10232          | -1043.918573         | -1045.114366         | -6.24                |
| 26          | -1121.313332         | -1122.476755         | -1121.293135         | -1122.488476         | 22.25                |
| 28          | -1198.67932          | -1199.85126          | -1198.668172         | -1199.863887         | -3.88                |
| 30          | -1276.06124          | -1277.226069         | -1276.043092         | -1277.23819          | 15.82                |
| 32          | -1353.42961          | -1354.600132         | -1353.417439         | -1354.613137         | -2.19                |
| 34          | -1430.809335         | -1431.974913         | -1430.792322         | -1431.987464         | 11.71                |
| 36          | -1508.179594         | -1509.34932          | -1508.167006         | -1509.362312         | -1.06                |
| 38          | -1585.557651         | -1586.723741         | -1585.541384         | -1586.736606         | 8.93                 |
| 40          | -1662.929068         | -1664.098116         | -1662.915969         | -1664.111295         | -0.21                |
| 42          | -1740.306043         | -1741.472521         | -1740.290318         | -1741.485529         | 7.13                 |
| 44          | -1817.678324         | -1818.846886         | -1817.664858         | -1818.860205         | 0.39                 |
| 46          | -1895.05458          | -1896.221279         | -1895.039225         | -1896.234466         | 5.69                 |
| 48          | -1972.427403         | -1973.595647         | -1972.413706         | -1973.609006         | 0.89                 |
| 50          | -2049.803176         | -2050.970006         | -2049.788012         | -2050.983328         | 4.84                 |
| 52          | -2127.176395         | -2128.344361         | -2127.162493         | -2128.357802         | 1.21                 |
| 54          | -2204.551766         | -2205.718751         | -2204.536865         | -2205.732101         | 4.07                 |
| 56          | -2281.925304         | -2283.093061         | -2281.911245         | -2283.106567         | 1.45                 |
| 58          | -2359.3004           | -2360.467441         | -2359.285609         | -2360.480894         | 3.51                 |
| 60          | -2436.674146         | -2437.841748         | -2436.659971         | -2437.855307         | 1.62                 |
| 62          | -2514.049038         | -2515.215836         | -2514.034324         | -2515.229627         | 2.42                 |
| 64          | -2591.422913         | -2592.59018          | -2591.408702         | -2592.60401          | 1.00                 |
| 66          | -2668.79767          | -2669.964559         | -2668.783051         | -2669.978314         | 2.27                 |

**Table S18:** The aromatic stabilisation energy for the neutral triplet annulenes (UB3LYP/6-31G(d)). The geometries were optimised without any constraints and do not contain imaginary frequencies.

| Triplet (0) | A                 | B                 | C                 | D                 | ASE                  |
|-------------|-------------------|-------------------|-------------------|-------------------|----------------------|
| <i>N</i>    | EE+ZPVE (Hartree) | EE+ZPVE (Hartree) | EE+ZPVE (Hartree) | EE+ZPVE (Hartree) | (C+D)-(A+B) (kJ/mol) |
| 12          | -579.578429       | -580.776098       | -579.567969       | -580.770706       | 41.62                |
| 14          | -657.00881        | -658.172843       | -657.00698        | -658.193134       | -48.47               |
| 16          | -734.365018       | -735.545986       | -734.355442       | -735.551356       | 11.04                |
| 18          | -811.777827       | -812.945767       | -811.774288       | -812.965758       | -43.19               |
| 20          | -889.130864       | -890.296798       | -889.118353       | -890.314729       | -14.23               |
| 22          | -966.535757       | -967.698792       | -966.528091       | -967.72113        | -38.52               |
| 24          | -1043.920368      | -1045.076695      | -1043.904319      | -1045.097297      | -11.95               |
| 26          | -1121.290506      | -1122.451049      | -1121.280299      | -1122.474562      | -34.93               |
| 28          | -1198.671841      | -1199.828408      | -1198.65641       | -1199.850285      | -16.92               |
| 30          | -1276.043573      | -1277.205369      | -1276.033154      | -1277.226636      | -28.48               |
| 32          | -1353.422861      | -1354.579673      | -1353.407637      | -1354.599111      | -11.06               |
| 34          | -1430.795684      | -1431.956179      | -1430.784031      | -1431.978169      | -27.14               |
| 36          | -1508.173444      | -1509.332323      | -1508.159325      | -1509.349782      | -8.77                |
| 38          | -1585.547131      | -1586.706752      | -1585.534459      | -1586.72922       | -25.72               |
| 40          | -1662.923896      | -1664.082667      | -1662.909676      | -1664.10101       | -10.82               |
| 42          | -1740.297674      | -1741.458487      | -1740.285072      | -1741.476006      | -12.91               |
| 44          | -1817.674172      | -1818.833812      | -1817.659809      | -1818.854818      | -17.44               |
| 46          | -1895.04826       | -1896.208506      | -1895.035065      | -1896.229905      | -21.54               |
| 48          | -1972.423971      | -1973.584012      | -1972.410172      | -1973.601556      | -9.83                |
| 50          | -2049.798588      | -2050.958401      | -2049.784925      | -2050.980103      | -21.11               |
| 52          | -2127.17397       | -2128.333795      | -2127.159976      | -2128.349243      | -3.82                |
| 54          | -2204.548428      | -2205.709135      | -2204.535056      | -2205.72986       | -19.31               |
| 56          | -2281.923866      | -2283.083489      | -2281.909684      | -2283.09946       | -4.70                |
| 58          | -2359.298393      | -2360.458756      | -2359.284704      | -2360.477138      | -12.32               |
| 60          | -2436.673414      | -2437.833935      | -2436.659649      | -2437.849182      | -3.89                |
| 62          | -2514.04824       | -2515.205873      | -2514.034299      | -2515.227206      | -19.41               |
| 64          | -2591.423156      | -2592.583424      | -2591.409209      | -2592.601952      | -12.03               |
| 66          | -2668.797769      | -2669.955372      | -2668.784125      | -2669.973997      | -13.08               |

**Table S19:** The aromatic stabilisation energy for the triplet dicationic annulenes (UB3LYP/6-31G(d)). The geometries were optimised without any constraints and do not contain imaginary frequencies.

| Triplet (2+) | A                 | B                 | C                 | D                 | ASE                  |
|--------------|-------------------|-------------------|-------------------|-------------------|----------------------|
| <i>N</i>     | EE+ZPVE (Hartree) | EE+ZPVE (Hartree) | EE+ZPVE (Hartree) | EE+ZPVE (Hartree) | (C+D)-(A+B) (kJ/mol) |
| 12           | -578.961141       | -580.195674       | -578.956286       | -580.173449       | 71.10                |
| 14           | -656.430638       | -657.606266       | -656.413916       | -657.610113       | 33.80                |
| 16           | -733.796551       | -734.995608       | -733.78762        | -734.993641       | 28.61                |
| 18           | -811.239436       | -812.401869       | -811.217566       | -812.405957       | 46.69                |
| 20           | -888.589043       | -889.782212       | -888.587297       | -889.784944       | -2.59                |
| 22           | -966.024068       | -967.182997       | -966.00252        | -967.19169        | 33.75                |
| 24           | -1043.402317      | -1044.569747      | -1043.394813      | -1044.584606      | -19.31               |
| 26           | -1120.79995       | -1121.958394      | -1120.778344      | -1121.968872      | 29.22                |
| 28           | -1198.177655      | -1199.343495      | -1198.167506      | -1199.358465      | -12.66               |
| 30           | -1275.572515      | -1276.729515      | -1275.55126       | -1276.743791      | 18.32                |
| 32           | -1352.947377      | -1354.112309      | -1352.935401      | -1354.12468       | -1.04                |
| 34           | -1430.339376      | -1431.494225      | -1430.318266      | -1431.511195      | 10.87                |
| 36           | -1507.714653      | -1508.875212      | -1507.701532      | -1508.891784      | -9.06                |
| 38           | -1585.103023      | -1586.258635      | -1585.081995      | -1586.27534       | 11.35                |
| 40           | -1662.47823       | -1663.638857      | -1662.464067      | -1663.654857      | -4.82                |
| 42           | -1739.864973      | -1741.018127      | -1739.844113      | -1741.036103      | 7.57                 |
| 44           | -1817.239417      | -1818.400149      | -1817.22446       | -1818.418577      | -9.11                |
| 46           | -1894.624571      | -1895.778951      | -1894.603981      | -1895.798613      | 2.44                 |
| 48           | -1971.999439      | -1973.157509      | -1971.983751      | -1973.175418      | -5.83                |
| 50           | -2049.382425      | -2050.538034      | -2049.362265      | -2050.557003      | 3.13                 |
| 52           | -2126.75734       | -2127.916175      | -2126.741453      | -2127.933703      | -4.31                |
| 54           | -2204.13932       | -2205.29378       | -2204.119721      | -2205.315135      | -4.61                |
| 56           | -2281.514272      | -2282.673525      | -2281.498037      | -2282.690516      | -1.98                |
| 58           | -2358.895168      | -2360.050895      | -2358.875916      | -2360.068997      | 3.02                 |
| 60           | -2436.270315      | -2437.428145      | -2436.253873      | -2437.446913      | -6.11                |
| 62           | -2513.65021       | -2514.806305      | -2513.631214      | -2514.824501      | 2.10                 |
| 64           | -2591.025588      | -2592.183973      | -2591.008855      | -2592.202098      | -3.65                |
| 66           | -2668.404665      | -2669.557972      | -2668.386027      | -2669.576957      | -0.91                |



**Table S20:** The aromatic stabilisation energy for the closed-shell dicationic annulenes (B3LYP/6-31G(d)). The geometries were optimised without any constraints and do not contain imaginary frequencies.

| Singlet (2+) | A                 | B                 | C                 | D                 | ASE                  |
|--------------|-------------------|-------------------|-------------------|-------------------|----------------------|
| <i>N</i>     | EE+ZPVE (Hartree) | EE+ZPVE (Hartree) | EE+ZPVE (Hartree) | EE+ZPVE (Hartree) | (C+D)-(A+B) (kJ/mol) |
| 12           | -578.999126       | -580.191222       | -578.967908       | -580.186556       | 94.21                |
| 14           | -656.439729       | -657.596371       | -656.438707       | -657.626213       | -75.67               |
| 16           | -733.82673        | -734.984833       | -733.801399       | -735.007741       | 6.36                 |
| 18           | -811.243405       | -812.397026       | -811.238155       | -812.436596       | -90.11               |
| 20           | -888.622917       | -889.764018       | -888.598198       | -889.800317       | -30.40               |
| 22           | -966.028137       | -967.176849       | -966.018012       | -967.217715       | -80.71               |
| 24           | -1043.431801      | -1044.564375      | -1043.404962      | -1044.602959      | -30.84               |
| 26           | -1120.803803      | -1121.950471      | -1120.790546      | -1121.991121      | -71.92               |
| 28           | -1198.202894      | -1199.335379      | -1198.175781      | -1199.374983      | -32.80               |
| 30           | -1275.575697      | -1276.723137      | -1275.563011      | -1276.761288      | -66.86               |
| 32           | -1352.969278      | -1354.10257       | -1352.942141      | -1354.142211      | -32.83               |
| 34           | -1430.342262      | -1431.488459      | -1430.327638      | -1431.526747      | -62.13               |
| 36           | -1507.733788      | -1508.869585      | -1507.708868      | -1508.907055      | -32.95               |
| 38           | -1585.105631      | -1586.25126       | -1585.089479      | -1586.289265      | -57.38               |
| 40           | -1662.494895      | -1663.631356      | -1662.469957      | -1663.668899      | -33.09               |
| 42           | -1739.86706       | -1741.014078      | -1739.851516      | -1741.04984       | -53.08               |
| 44           | -1817.253978      | -1818.394021      | -1817.229091      | -1818.428658      | -25.60               |
| 46           | -1894.626402      | -1895.773123      | -1894.609772      | -1895.808784      | -49.97               |
| 48           | -1972.011999      | -1973.151623      | -1971.98857       | -1973.186862      | -31.01               |
| 50           | -2049.384226      | -2050.530879      | -2049.366701      | -2050.566231      | -46.80               |
| 52           | -2126.768437      | -2127.908852      | -2126.74509       | -2127.943977      | -30.92               |
| 54           | -2204.14097       | -2205.289008      | -2204.124109      | -2205.322522      | -43.72               |
| 56           | -2281.523793      | -2282.665137      | -2281.500602      | -2282.699963      | -30.55               |
| 58           | -2358.896714      | -2360.044738      | -2358.879193      | -2360.078064      | -41.50               |
| 60           | -2436.278578      | -2437.421866      | -2436.256662      | -2437.454977      | -29.39               |
| 62           | -2513.651569      | -2514.797387      | -2513.633514      | -2514.832773      | -45.50               |
| 64           | -2591.032476      | -2592.176544      | -2591.010737      | -2592.209478      | -29.39               |
| 66           | -2668.405692      | -2669.555128      | -2668.388349      | -2669.586685      | -37.32               |

**Table S21:** The aromatic stabilisation energy for the neutral triplet annulenes (UB3LYP/6-31G(d)). The geometries were optimised using the IOp(2/15=4,2/16=2) keyword ensuring planarity. As a result, some structures may have one or more imaginary frequencies.

| Triplet (0) | A                 | B                 | C                 | D                 | ASE                  |
|-------------|-------------------|-------------------|-------------------|-------------------|----------------------|
| <i>N</i>    | EE+ZPVE (Hartree) | EE+ZPVE (Hartree) | EE+ZPVE (Hartree) | EE+ZPVE (Hartree) | (C+D)-(A+B) (kJ/mol) |
| 12          | -579.541757       | -580.651286       | -579.527115       | -580.714512       | -127.56              |
| 14          | -656.996285       | -658.142024       | -656.995884       | -658.173127       | -80.61               |
| 16          | -734.351551       | -735.477717       | -734.336181       | -735.519662       | -69.77               |
| 18          | -811.778417       | -812.932159       | -811.774556       | -812.951422       | -40.44               |
| 20          | -889.128052       | -890.251333       | -889.112987       | -890.295453       | -76.28               |
| 22          | -966.53574        | -967.685899       | -966.528096       | -967.708554       | -39.41               |
| 24          | -1043.920284      | -1045.06388       | -1043.904308      | -1045.08415       | -11.27               |
| 26          | -1121.290514      | -1122.441528      | -1121.281034      | -1122.461795      | -28.32               |
| 28          | -1198.671771      | -1199.81542       | -1198.656361      | -1199.836806      | -15.69               |
| 30          | -1276.043528      | -1277.192903      | -1276.033154      | -1277.213477      | -26.78               |
| 32          | -1353.422861      | -1354.566465      | -1353.407718      | -1354.58856       | -18.25               |
| 34          | -1430.79569       | -1431.943566      | -1430.784031      | -1431.964801      | -25.14               |
| 36          | -1508.173439      | -1509.319659      | -1508.159436      | -1509.339764      | -16.02               |
| 38          | -1585.547108      | -1586.693957      | -1585.53454       | -1586.715641      | -23.93               |
| 40          | -1662.92391       | -1664.069848      | -1662.909824      | -1664.090534      | -17.33               |
| 42          | -1740.297704      | -1741.445564      | -1740.285226      | -1741.46573       | -20.18               |
| 44          | -1817.674195      | -1818.819803      | -1817.659982      | -1818.840941      | -18.18               |
| 46          | -1895.048282      | -1896.195413      | -1895.035226      | -1896.216035      | -19.86               |
| 48          | -1972.423978      | -1973.57089       | -1972.41033       | -1973.590829      | -16.52               |
| 50          | -2049.798604      | -2050.945104      | -2049.785096      | -2050.966091      | -19.64               |
| 52          | -2127.173991      | -2128.320478      | -2127.160161      | -2128.340863      | -17.21               |
| 54          | -2204.548456      | -2205.6958        | -2204.535237      | -2205.71576       | -17.70               |
| 56          | -2281.923886      | -2283.07004       | -2281.90987       | -2283.09078       | -17.65               |
| 58          | -2359.298422      | -2360.445259      | -2359.284877      | -2360.465604      | -17.85               |
| 60          | -2436.673678      | -2437.819488      | -2436.659505      | -2437.840542      | -18.07               |
| 62          | -2514.048266      | -2515.194674      | -2514.034451      | -2515.215355      | -18.03               |
| 64          | -2591.423118      | -2592.569778      | -2591.409363      | -2592.590033      | -17.07               |
| 66          | -2668.79778       | -2669.944823      | -2668.784275      | -2669.964787      | -16.96               |

**Table S22:** The aromatic stabilisation energy for the triplet dicationic annulenes (UB3LYP/6-31G(d)). The geometries were optimised using the IOp(2/15=4,2/16=2) keyword ensuring planarity. As a result, some structures may have one or more imaginary frequencies.

| Triplet (2+) | A                 | B                 | C                 | D                 | ASE                  |
|--------------|-------------------|-------------------|-------------------|-------------------|----------------------|
| <i>N</i>     | EE+ZPVE (Hartree) | EE+ZPVE (Hartree) | EE+ZPVE (Hartree) | EE+ZPVE (Hartree) | (C+D)-(A+B) (kJ/mol) |
| 12           | -578.904307       | -580.107851       | -578.915913       | -580.105202       | -23.52               |
| 14           | -656.415691       | -657.589072       | -656.398929       | -657.587134       | 49.10                |
| 16           | -733.764071       | -734.954052       | -733.769845       | -734.957379       | -23.89               |
| 18           | -811.239402       | -812.394822       | -811.217729       | -812.405913       | 27.78                |
| 20           | -888.581005       | -889.761008       | -888.579954       | -889.766899       | -12.71               |
| 22           | -966.024069       | -967.17656        | -966.002618       | -967.183607       | 37.82                |
| 24           | -1043.40288       | -1044.562402      | -1043.394795      | -1044.575901      | -14.21               |
| 26           | -1120.800854      | -1121.948794      | -1120.779489      | -1121.962511      | 20.08                |
| 28           | -1198.178059      | -1199.335007      | -1198.167468      | -1199.348715      | -8.18                |
| 30           | -1275.572478      | -1276.719466      | -1275.55126       | -1276.733708      | 18.32                |
| 32           | -1352.947397      | -1354.102816      | -1352.935414      | -1354.116785      | -5.21                |
| 34           | -1430.339358      | -1431.486138      | -1430.318264      | -1431.500468      | 17.76                |
| 36           | -1507.714677      | -1508.866602      | -1507.701533      | -1508.88415       | -11.56               |
| 38           | -1585.10299       | -1586.24964       | -1585.08201       | -1586.264049      | 17.25                |
| 40           | -1662.478269      | -1663.629545      | -1662.464091      | -1663.64649       | -7.26                |
| 42           | -1739.864993      | -1741.009336      | -1739.844136      | -1741.02684       | 8.80                 |
| 44           | -1817.239446      | -1818.390156      | -1817.224486      | -1818.406664      | -4.06                |
| 46           | -1894.624584      | -1895.769472      | -1894.604004      | -1895.786475      | 9.39                 |
| 48           | -1971.999165      | -1973.147712      | -1971.983744      | -1973.166547      | -8.96                |
| 50           | -2049.382431      | -2050.527911      | -2049.362286      | -2050.54454       | 9.23                 |
| 52           | -2126.757375      | -2127.905845      | -2126.741477      | -2127.923995      | -5.91                |
| 54           | -2204.139308      | -2205.283786      | -2204.119762      | -2205.302398      | 2.45                 |
| 56           | -2281.514314      | -2282.662779      | -2281.498041      | -2282.68035       | -3.41                |
| 58           | -2358.895128      | -2360.0404        | -2358.875983      | -2360.05842       | 2.95                 |
| 60           | -2436.270223      | -2437.418645      | -2436.253603      | -2437.43578       | -1.35                |
| 62           | -2513.650231      | -2514.796058      | -2513.631313      | -2514.813592      | 3.63                 |
| 64           | -2591.02562       | -2592.172905      | -2591.008984      | -2592.191458      | -5.03                |
| 66           | -2668.404694      | -2669.549747      | -2668.386176      | -2669.568725      | -1.21                |

**Table S23:** The aromatic stabilisation energy for the closed-shell dicationic annulenes (B3LYP/6-31G(d)). The geometries were optimised using the IOp(2/15=4,2/16=2) keyword ensuring planarity. As a result, some structures may have one or more imaginary frequencies.

| Singlet (2+) | A                 | B                 | C                 | D                 | ASE                  |
|--------------|-------------------|-------------------|-------------------|-------------------|----------------------|
| <i>N</i>     | EE+ZPVE (Hartree) | EE+ZPVE (Hartree) | EE+ZPVE (Hartree) | EE+ZPVE (Hartree) | (C+D)-(A+B) (kJ/mol) |
| 12           | -578.9533         | -580.096629       | -578.929144       | -580.127468       | -17.55               |
| 14           | -656.422207       | -657.569341       | -656.425132       | -657.610689       | -116.24              |
| 16           | -733.807737       | -734.942009       | -733.781787       | -734.974665       | -17.61               |
| 18           | -811.243404       | -812.383855       | -811.238376       | -812.422095       | -87.20               |
| 20           | -888.616221       | -889.748175       | -888.590973       | -889.781087       | -20.12               |
| 22           | -966.028139       | -967.163632       | -966.018011       | -967.209204       | -93.06               |
| 24           | -1043.431783      | -1044.558164      | -1043.404962      | -1044.593738      | -22.98               |
| 26           | -1120.805258      | -1121.942519      | -1120.793007      | -1121.983459      | -75.32               |
| 28           | -1198.202857      | -1199.32833       | -1198.175741      | -1199.364808      | -24.58               |
| 30           | -1275.575657      | -1276.710489      | -1275.563012      | -1276.751127      | -73.50               |
| 32           | -1352.969274      | -1354.094564      | -1352.942155      | -1354.131239      | -25.09               |
| 34           | -1430.342275      | -1431.47556       | -1430.327638      | -1431.515935      | -67.58               |
| 36           | -1507.733782      | -1508.861607      | -1507.708872      | -1508.895824      | -24.44               |
| 38           | -1585.105641      | -1586.238102      | -1585.089481      | -1586.277863      | -61.96               |
| 40           | -1662.494895      | -1663.622789      | -1662.469958      | -1663.6572        | -24.87               |
| 42           | -1739.867063      | -1741.001038      | -1739.851538      | -1741.03805       | -56.41               |
| 44           | -1817.253968      | -1818.382131      | -1817.229109      | -1818.416501      | -24.97               |
| 46           | -1894.626401      | -1895.759925      | -1894.609856      | -1895.796605      | -52.86               |
| 48           | -1972.011999      | -1973.142025      | -1971.988653      | -1973.174455      | -23.85               |
| 50           | -2049.384239      | -2050.517492      | -2049.366813      | -2050.553724      | -49.38               |
| 52           | -2126.768449      | -2127.898807      | -2126.745193      | -2127.931284      | -24.21               |
| 54           | -2204.140983      | -2205.275607      | -2204.124247      | -2205.309773      | -45.76               |
| 56           | -2281.523794      | -2282.654687      | -2281.500723      | -2282.68703       | -24.34               |
| 58           | -2358.896691      | -2360.031225      | -2358.879334      | -2360.065102      | -43.37               |
| 60           | -2436.278329      | -2437.409731      | -2436.255426      | -2437.441911      | -24.36               |
| 62           | -2513.651561      | -2514.786093      | -2513.633651      | -2514.819609      | -40.97               |
| 64           | -2591.032479      | -2592.165453      | -2591.010866      | -2592.196187      | -23.95               |
| 66           | -2668.40577       | -2669.541422      | -2668.388488      | -2669.573372      | -38.51               |

**Table S24:** The aromatic stabilisation energy for the closed-shell neutral annulenes (CAM-B3LYP/6-31G(d)). The geometries were optimised without any constraints and do not contain imaginary frequencies.

| Singlet (0) | A                    | B                    | C                    | D                    | ASE                  |
|-------------|----------------------|----------------------|----------------------|----------------------|----------------------|
| N           | EE+ZPEC<br>(Hartree) | EE+ZPEC<br>(Hartree) | EE+ZPEC<br>(Hartree) | EE+ZPEC<br>(Hartree) | (C+D)-(A+B) (kJ/mol) |
| 12          | -579.257294          | -580.469237          | -579.25118           | -580.472907          | 6.42                 |
| 14          | -656.632584          | -657.816259          | -656.626662          | -657.819321          | 7.51                 |
| 16          | -733.921953          | -735.126293          | -733.922698          | -735.12997           | -11.61               |
| 18          | -811.289824          | -812.469522          | -811.280526          | -812.473618          | 13.66                |
| 20          | -888.577797          | -889.775301          | -888.579043          | -889.77722           | -8.31                |
| 22          | -965.938462          | -967.117584          | -965.929353          | -967.122537          | 10.91                |
| 24          | -1043.260963         | -1044.4418           | -1043.25409          | -1044.449673         | -2.63                |
| 26          | -1120.58689          | -1121.766069         | -1120.578177         | -1121.773662         | 2.94                 |
| 28          | -1197.91005          | -1199.089959         | -1197.90227          | -1199.098193         | -1.19                |
| 30          | -1275.235178         | -1276.414251         | -1275.226684         | -1276.422209         | 1.41                 |
| 32          | -1352.558545         | -1353.737736         | -1352.550265         | -1353.745812         | 0.54                 |
| 34          | -1429.883147         | -1431.061972         | -1429.874585         | -1431.070172         | 0.95                 |
| 36          | -1507.207028         | -1508.385794         | -1507.198543         | -1508.394155         | 0.33                 |
| 38          | -1584.531036         | -1585.709649         | -1584.522409         | -1585.718028         | 0.65                 |
| 40          | -1661.854836         | -1663.033444         | -1661.846293         | -1663.041937         | 0.13                 |
| 42          | -1739.178842         | -1740.357215         | -1739.170166         | -1740.365736         | 0.41                 |
| 44          | -1816.502662         | -1817.680932         | -1816.493991         | -1817.689652         | -0.13                |
| 46          | -1893.826571         | -1895.004698         | -1893.817816         | -1895.013426         | 0.07                 |
| 48          | -1971.150404         | -1972.328469         | -1971.141646         | -1972.33726          | -0.09                |
| 50          | -2048.474251         | -2049.652275         | -2048.465449         | -2049.661074         | 0.01                 |
| 52          | -2125.798071         | -2126.976037         | -2125.789249         | -2126.984886         | -0.07                |
| 54          | -2203.121897         | -2204.299817         | -2203.113038         | -2204.308661         | 0.04                 |
| 56          | -2280.445699         | -2281.623586         | -2280.436831         | -2281.632473         | -0.05                |
| 58          | -2357.769501         | -2358.94735          | -2357.760606         | -2358.95624          | 0.01                 |
| 60          | -2435.093294         | -2436.271119         | -2435.084392         | -2436.280036         | -0.04                |
| 62          | -2512.417077         | -2513.594968         | -2512.408154         | -2513.603797         | 0.25                 |
| 64          | -2589.740862         | -2590.918613         | -2589.731918         | -2590.927567         | -0.03                |
| 66          | -2667.064635         | -2668.242378         | -2667.055695         | -2668.251314         | 0.01                 |

**Table S25:** The aromatic stabilisation energy for the closed-shell dicationic annulenes (CAM-B3LYP/6-31G(d)). The geometries were optimised without any constraints and do not contain imaginary frequencies.

| Singlet<br>(2+) | A                    | B                    | C                    | D                    | ASE                  |
|-----------------|----------------------|----------------------|----------------------|----------------------|----------------------|
| <i>N</i>        | EE+ZPEC<br>(Hartree) | EE+ZPEC<br>(Hartree) | EE+ZPEC<br>(Hartree) | EE+ZPEC<br>(Hartree) | (C+D)-(A+B) (kJ/mol) |
| 12              | -578.624345          | -579.82439           | -578.595726          | -579.81355           | 103.60               |
| 14              | -656.01975           | -657.182186          | -656.013545          | -657.201131          | -33.45               |
| 16              | -733.347435          | -734.516186          | -733.32659           | -734.542223          | -13.63               |
| 18              | -810.719552          | -811.872684          | -810.708595          | -811.900498          | -44.26               |
| 20              | -888.038878          | -889.203216          | -888.019221          | -889.220341          | 6.65                 |
| 22              | -965.400207          | -966.545948          | -965.385378          | -966.589882          | -76.42               |
| 24              | -1042.743742         | -1043.886608         | -1042.723359         | -1043.92508          | -47.49               |
| 26              | -1120.074338         | -1121.225982         | -1120.058345         | -1121.263007         | -55.22               |
| 28              | -1197.411436         | -1198.554022         | -1197.390662         | -1198.594246         | -51.07               |
| 30              | -1274.741257         | -1275.890629         | -1274.725937         | -1275.928165         | -58.33               |
| 32              | -1352.074955         | -1353.217551         | -1352.053693         | -1353.258602         | -51.96               |
| 34              | -1429.40457          | -1430.552177         | -1429.387316         | -1430.590924         | -56.43               |
| 36              | -1506.736308         | -1507.885203         | -1506.718576         | -1507.920678         | -46.58               |
| 38              | -1584.064731         | -1585.211483         | -1584.046013         | -1585.250721         | -53.88               |
| 40              | -1661.394893         | -1662.543505         | -1661.376445         | -1662.579719         | -46.64               |
| 42              | -1738.722864         | -1739.874888         | -1738.706366         | -1739.908612         | -45.23               |
| 44              | -1816.05157          | -1817.200177         | -1816.032444         | -1817.23669          | -45.65               |
| 46              | -1893.379118         | -1894.530628         | -1893.361671         | -1894.564833         | -44.00               |
| 48              | -1970.706868         | -1971.860181         | -1970.690097         | -1971.892074         | -39.70               |
| 50              | -2048.033934         | -2049.184746         | -2048.015663         | -2049.219625         | -43.60               |
| 52              | -2125.361033         | -2126.514286         | -2125.343643         | -2126.546453         | -38.80               |
| 54              | -2202.68768          | -2203.843042         | -2202.67131          | -2203.873244         | -36.32               |
| 56              | -2280.014217         | -2281.167054         | -2279.996219         | -2281.199765         | -38.63               |
| 58              | -2357.340529         | -2358.495808         | -2357.323516         | -2358.526143         | -34.98               |
| 60              | -2434.666586         | -2435.819678         | -2434.64803          | -2435.852217         | -36.71               |
| 62              | -2511.992588         | -2513.147541         | -2511.975002         | -2513.178264         | -34.49               |
| 64              | -2589.318336         | -2590.474884         | -2589.301604         | -2590.503928         | -32.33               |
| 66              | -2666.644098         | -2667.802159         | -2666.628013         | -2667.829614         | -29.85               |

**Table S26:** The aromatic stabilisation energy for the neutral triplet annulenes (UCAM-B3LYP/6-31G(d)). The geometries were optimised without any constraints and do not contain imaginary frequencies.

| Triplet (0) | A                    | B                    | C                    | D                    | ASE                  |
|-------------|----------------------|----------------------|----------------------|----------------------|----------------------|
| N           | EE+ZPEC<br>(Hartree) | EE+ZPEC<br>(Hartree) | EE+ZPEC<br>(Hartree) | EE+ZPEC<br>(Hartree) | (C+D)-(A+B) (kJ/mol) |
| 12          | -579.214462          | -580.417422          | -579.209328          | -580.443968          | -56.22               |
| 14          | -656.600181          | -657.765764          | -656.596127          | -657.782368          | -32.95               |
| 16          | -733.89842           | -735.083739          | -733.896026          | -735.09935           | -34.70               |
| 18          | -811.266452          | -812.43746           | -811.261788          | -812.451587          | -24.85               |
| 20          | -888.562903          | -889.742891          | -888.557886          | -889.751974          | -10.68               |
| 22          | -965.922908          | -967.090428          | -965.915804          | -967.109962          | -32.63               |
| 24          | -1043.251103         | -1044.41849          | -1043.242726         | -1044.436368         | -24.94               |
| 26          | -1120.576652         | -1121.745854         | -1120.568631         | -1121.763068         | -24.14               |
| 28          | -1197.903326         | -1199.069681         | -1197.894479         | -1199.088967         | -27.41               |
| 30          | -1275.228839         | -1276.39683          | -1275.220762         | -1276.414926         | -26.30               |
| 32          | -1352.554867         | -1353.720392         | -1352.545478         | -1353.740616         | -28.45               |
| 34          | -1429.880236         | -1431.047071         | -1429.871472         | -1431.066168         | -27.13               |
| 36          | -1507.205671         | -1508.373188         | -1507.196903         | -1508.391394         | -24.78               |
| 38          | -1584.531085         | -1585.696979         | -1584.52183          | -1585.716952         | -28.14               |
| 40          | -1661.856247         | -1663.022915         | -1661.847101         | -1663.041996         | -26.08               |
| 42          | -1739.181238         | -1740.34851          | -1739.172355         | -1740.36709          | -25.46               |
| 44          | -1816.506573         | -1817.672195         | -1816.497099         | -1817.692298         | -27.91               |
| 46          | -1893.831489         | -1894.99792          | -1893.822252         | -1895.017275         | -26.56               |
| 48          | -1971.156405         | -1972.323069         | -1971.147336         | -1972.34215          | -26.29               |
| 50          | -2048.481522         | -2049.646894         | -2048.472021         | -2049.667274         | -28.56               |
| 52          | -2125.806359         | -2126.972252         | -2125.797046         | -2126.992085         | -27.62               |
| 54          | -2203.131155         | -2204.297338         | -2203.122066         | -2204.316951         | -27.63               |
| 56          | -2280.456192         | -2281.621239         | -2280.446678         | -2281.641892         | -29.25               |
| 58          | -2357.781006         | -2358.946409         | -2357.771656         | -2358.966738         | -28.83               |
| 60          | -2435.105926         | -2436.270311         | -2435.096251         | -2436.2916           | -30.49               |
| 62          | -2512.430715         | -2513.59693          | -2512.421198         | -2513.616421         | -26.19               |
| 64          | -2589.755455         | -2590.917222         | -2589.746092         | -2590.941147         | -38.23               |
| 66          | -2667.080204         | -2668.245246         | -2667.070989         | -2668.265909         | -30.06               |

**Table S27:** The aromatic stabilisation energy for the triplet dicationic annulenes (UCAM-B3LYP/6-31G(d)). The geometries were optimised without any constraints and do not contain imaginary frequencies.

| Triplet (2+) | A                    | B                    | C                    | D                    | ASE                  |
|--------------|----------------------|----------------------|----------------------|----------------------|----------------------|
| <i>N</i>     | EE+ZPEC<br>(Hartree) | EE+ZPEC<br>(Hartree) | EE+ZPEC<br>(Hartree) | EE+ZPEC<br>(Hartree) | (C+D)-(A+B) (kJ/mol) |
| 12           | -578.599567          | -579.785285          | -578.586951          | -579.804228          | -16.61               |
| 14           | -656.006264          | -657.187315          | -655.994136          | -657.190723          | 22.89                |
| 16           | -733.323042          | -734.518363          | -733.316529          | -734.522764          | 5.55                 |
| 18           | -810.7103            | -811.879649          | -810.694762          | -811.891905          | 8.62                 |
| 20           | -888.014911          | -889.210665          | -888.011172          | -889.213603          | 2.10                 |
| 22           | -965.391669          | -966.562924          | -965.376769          | -966.567973          | 25.86                |
| 24           | -1042.725793         | -1043.899138         | -1042.71588          | -1043.908889         | 0.43                 |
| 26           | -1120.065536         | -1121.234371         | -1120.051633         | -1121.246619         | 4.35                 |
| 28           | -1197.398862         | -1198.571052         | -1197.387031         | -1198.580418         | 6.47                 |
| 30           | -1274.735012         | -1275.904434         | -1274.721411         | -1275.916212         | 4.79                 |
| 32           | -1352.066508         | -1353.237907         | -1352.053332         | -1353.247083         | 10.50                |
| 34           | -1429.400245         | -1430.570263         | -1429.386473         | -1430.581406         | 6.90                 |
| 36           | -1506.731129         | -1507.900571         | -1506.717985         | -1507.91395          | -0.62                |
| 38           | -1584.062259         | -1585.232685         | -1584.048336         | -1585.243402         | 8.42                 |
| 40           | -1661.392528         | -1662.562305         | -1661.378908         | -1662.574769         | 3.04                 |
| 42           | -1738.722235         | -1739.891459         | -1738.708644         | -1739.90542          | -0.97                |
| 44           | -1816.051603         | -1817.221657         | -1816.037608         | -1817.233432         | 5.83                 |
| 46           | -1893.380095         | -1894.55035          | -1893.36671          | -1894.563429         | 0.80                 |
| 48           | -1970.708745         | -1971.878264         | -1970.695248         | -1971.89259          | -2.18                |
| 50           | -2048.037275         | -2049.207504         | -2048.023248         | -2049.219894         | 4.30                 |
| 52           | -2125.365398         | -2126.535071         | -2125.351345         | -2126.548538         | 1.54                 |
| 54           | -2202.692861         | -2203.862443         | -2202.679036         | -2203.876725         | -1.20                |
| 56           | -2280.020602         | -2281.190587         | -2280.006335         | -2281.203353         | 3.94                 |
| 58           | -2357.34767          | -2358.51773          | -2357.333676         | -2358.531227         | 1.30                 |
| 60           | -2434.674858         | -2435.845083         | -2434.66043          | -2435.857287         | 5.84                 |
| 62           | -2512.001661         | -2513.171908         | -2511.987503         | -2513.184894         | 3.08                 |
| 64           | -2589.328507         | -2590.498417         | -2589.314461         | -2590.512098         | 0.96                 |
| 66           | -2666.654062         | -2667.824828         | -2666.641095         | -2667.839001         | -3.17                |



**Table S28:** The aromatic stabilisation energy for the neutral triplet annulenes (UCAM-B3LYP/6-31G(d)). The closed-shell neutral **B** and **D** geometries were optimised using the IOp(2/15=4,2/16=2) keyword ensuring planarity.

| Triplet (0) | A <sub>Triplet neutral</sub> | B <sub>Singlet neutral</sub> | C <sub>Triplet neutral</sub> | D <sub>Singlet neutral</sub> | ASE                  |
|-------------|------------------------------|------------------------------|------------------------------|------------------------------|----------------------|
| N           | EE+ZPEC<br>(Hartree)         | EE+ZPEC<br>(Hartree)         | EE+ZPEC<br>(Hartree)         | EE+ZPEC<br>(Hartree)         | (C+D)-(A+B) (kJ/mol) |
| 12          | -579.214462                  | -580.381995                  | -579.209328                  | -580.383566                  | 9.35                 |
| 14          | -656.600181                  | -657.783408                  | -656.596127                  | -657.78551                   | 5.12                 |
| 16          | -733.89842                   | -735.077439                  | -733.896026                  | -735.082073                  | -5.88                |
| 18          | -811.266452                  | -812.451885                  | -811.261788                  | -812.459648                  | -8.14                |
| 20          | -888.562903                  | -889.745547                  | -888.557886                  | -889.751467                  | -2.37                |
| 22          | -965.922908                  | -967.101288                  | -965.915804                  | -967.110106                  | -4.50                |
| 24          | -1043.251103                 | -1044.42571                  | -1043.242726                 | -1044.435                    | -2.40                |
| 26          | -1120.576652                 | -1121.750119                 | -1120.568631                 | -1121.759299                 | -3.04                |
| 28          | -1197.903326                 | -1199.073855                 | -1197.894479                 | -1199.083238                 | -1.41                |
| 30          | -1275.228839                 | -1276.398572                 | -1275.220762                 | -1276.407681                 | -2.71                |
| 32          | -1352.554867                 | -1353.721738                 | -1352.545478                 | -1353.731217                 | -0.24                |
| 34          | -1429.880236                 | -1431.046404                 | -1429.871472                 | -1431.055643                 | -1.25                |
| 36          | -1507.205671                 | -1508.370181                 | -1507.196903                 | -1508.379594                 | -1.69                |
| 38          | -1584.531085                 | -1585.694133                 | -1584.52183                  | -1585.703441                 | -0.14                |
| 40          | -1661.856247                 | -1663.017886                 | -1661.847101                 | -1663.027325                 | -0.77                |
| 42          | -1739.181238                 | -1740.341643                 | -1739.172355                 | -1740.351121                 | -1.56                |
| 44          | -1816.506573                 | -1817.665498                 | -1816.497099                 | -1817.674965                 | 0.02                 |
| 46          | -1893.831489                 | -1894.989268                 | -1893.822252                 | -1894.998775                 | -0.71                |
| 48          | -1971.156405                 | -1972.313014                 | -1971.147336                 | -1972.322578                 | -1.30                |
| 50          | -2048.481522                 | -2049.636824                 | -2048.472021                 | -2049.646352                 | -0.07                |
| 52          | -2125.806359                 | -2126.960565                 | -2125.797046                 | -2126.970147                 | -0.71                |
| 54          | -2203.131155                 | -2204.284323                 | -2203.122066                 | -2204.293923                 | -1.34                |
| 56          | -2280.456192                 | -2281.608116                 | -2280.446678                 | -2281.617705                 | -0.20                |
| 58          | -2357.781006                 | -2358.931857                 | -2357.771656                 | -2358.941465                 | -0.68                |
| 60          | -2435.105926                 | -2436.255619                 | -2435.096251                 | -2436.265226                 | 0.18                 |
| 62          | -2512.430715                 | -2513.579372                 | -2512.421198                 | -2513.588987                 | -0.26                |
| 64          | -2589.755455                 | -2590.903094                 | -2589.746092                 | -2590.912738                 | -0.74                |
| 66          | -2667.080204                 | -2668.226818                 | -2667.070989                 | -2668.236479                 | -1.17                |

**Table S29:** The aromatic stabilisation energy for the triplet dicationic annulenes (UCAM-B3LYP/6-31G(d)). The closed-shell neutral **B** and **D** geometries were optimised using the IOp(2/15=4,2/16=2) keyword ensuring planarity.

| Triplet (2+) | <b>A</b> <sub>Triplet charged</sub> | <b>B</b> <sub>Singlet neutral</sub> | <b>C</b> <sub>Triplet charged</sub> | <b>D</b> <sub>Singlet neutral</sub> | ASE                  |
|--------------|-------------------------------------|-------------------------------------|-------------------------------------|-------------------------------------|----------------------|
| <i>N</i>     | EE+ZPEC<br>(Hartree)                | EE+ZPEC<br>(Hartree)                | EE+ZPEC<br>(Hartree)                | EE+ZPEC<br>(Hartree)                | (C+D)-(A+B) (kJ/mol) |
| 12           | -578.599567                         | -580.381995                         | -578.586951                         | -580.383566                         | 29.00                |
| 14           | -656.006264                         | -657.783408                         | -655.994136                         | -657.78551                          | 26.32                |
| 16           | -733.323042                         | -735.077439                         | -733.316529                         | -735.082073                         | 4.93                 |
| 18           | -810.71103                          | -812.451885                         | -810.694762                         | -812.459648                         | 20.41                |
| 20           | -888.014911                         | -889.745547                         | -888.011172                         | -889.751467                         | -5.73                |
| 22           | -965.391669                         | -967.101288                         | -965.376769                         | -967.110106                         | 15.97                |
| 24           | -1042.725793                        | -1044.42571                         | -1042.71588                         | -1044.435                           | 1.64                 |
| 26           | -1120.065536                        | -1121.750119                        | -1120.051633                        | -1121.759299                        | 12.40                |
| 28           | -1197.398862                        | -1199.073855                        | -1197.387031                        | -1199.083238                        | 6.43                 |
| 30           | -1274.735012                        | -1276.398572                        | -1274.721411                        | -1276.407681                        | 11.79                |
| 32           | -1352.066508                        | -1353.721738                        | -1352.053332                        | -1353.731217                        | 9.71                 |
| 34           | -1429.400245                        | -1431.046404                        | -1429.386473                        | -1431.055643                        | 11.90                |
| 36           | -1506.731129                        | -1508.370181                        | -1506.717985                        | -1508.379594                        | 9.80                 |
| 38           | -1584.062259                        | -1585.694133                        | -1584.048336                        | -1585.703441                        | 12.12                |
| 40           | -1661.392528                        | -1663.017886                        | -1661.378908                        | -1663.027325                        | 10.98                |
| 42           | -1738.722235                        | -1740.341643                        | -1738.708644                        | -1740.351121                        | 10.80                |
| 44           | -1816.051603                        | -1817.665498                        | -1816.037608                        | -1817.674965                        | 11.89                |
| 46           | -1893.380095                        | -1894.989268                        | -1893.36671                         | -1894.998775                        | 10.18                |
| 48           | -1970.708745                        | -1972.313014                        | -1970.695248                        | -1972.322578                        | 10.33                |
| 50           | -2048.037275                        | -2049.636824                        | -2048.023248                        | -2049.646352                        | 11.81                |
| 52           | -2125.365398                        | -2126.960565                        | -2125.351345                        | -2126.970147                        | 11.74                |
| 54           | -2202.692861                        | -2204.284323                        | -2202.679036                        | -2204.293923                        | 11.09                |
| 56           | -2280.020602                        | -2281.608116                        | -2280.006335                        | -2281.617705                        | 12.28                |
| 58           | -2357.34767                         | -2358.931857                        | -2357.333676                        | -2358.941465                        | 11.52                |
| 60           | -2434.674858                        | -2436.255619                        | -2434.66043                         | -2436.265226                        | 12.66                |
| 62           | -2512.001661                        | -2513.579372                        | -2511.987503                        | -2513.588987                        | 11.93                |
| 64           | -2589.328507                        | -2590.903094                        | -2589.314461                        | -2590.912738                        | 11.56                |
| 66           | -2666.654062                        | -2668.226818                        | -2666.641095                        | -2668.236479                        | 8.68                 |

**Table S30:** The aromatic stabilisation energy for the closed-shell dicationic annulenes (CAM-B3LYP/6-31G(d)). The closed-shell neutral **B** and **D** geometries were optimised using the IOP(2/15=4,2/16=2) keyword ensuring planarity.

| Singlet (2+) | A <sub>Singlet charged</sub> | B <sub>Singlet neutral</sub> | C <sub>Singlet charged</sub> | D <sub>Singlet neutral</sub> | ASE                  |
|--------------|------------------------------|------------------------------|------------------------------|------------------------------|----------------------|
| N            | EE+ZPEC<br>(Hartree)         | EE+ZPEC<br>(Hartree)         | EE+ZPEC<br>(Hartree)         | EE+ZPEC<br>(Hartree)         | (C+D)-(A+B) (kJ/mol) |
| 12           | -578.624345                  | -580.381995                  | -578.595726                  | -580.383566                  | 71.01                |
| 14           | -656.01975                   | -657.783408                  | -656.013545                  | -657.78551                   | 10.77                |
| 16           | -733.347435                  | -735.077439                  | -733.32659                   | -735.082073                  | 42.56                |
| 18           | -810.719552                  | -812.451885                  | -810.708595                  | -812.459648                  | 8.39                 |
| 20           | -888.038878                  | -889.745547                  | -888.019221                  | -889.751467                  | 36.07                |
| 22           | -965.400207                  | -967.101288                  | -965.385378                  | -967.110106                  | 15.78                |
| 24           | -1042.743742                 | -1044.42571                  | -1042.723359                 | -1044.435                    | 29.12                |
| 26           | -1120.074338                 | -1121.750119                 | -1120.058345                 | -1121.759299                 | 17.89                |
| 28           | -1197.411436                 | -1199.073855                 | -1197.390662                 | -1199.083238                 | 29.91                |
| 30           | -1274.741257                 | -1276.398572                 | -1274.725937                 | -1276.407681                 | 16.31                |
| 32           | -1352.074955                 | -1353.721738                 | -1352.053693                 | -1353.731217                 | 30.94                |
| 34           | -1429.40457                  | -1431.046404                 | -1429.387316                 | -1431.055643                 | 21.04                |
| 36           | -1506.736308                 | -1508.370181                 | -1506.718576                 | -1508.379594                 | 21.84                |
| 38           | -1584.064731                 | -1585.694133                 | -1584.046013                 | -1585.703441                 | 24.71                |
| 40           | -1661.394893                 | -1663.017886                 | -1661.376445                 | -1663.027325                 | 23.65                |
| 42           | -1738.722864                 | -1740.341643                 | -1738.706366                 | -1740.351121                 | 18.43                |
| 44           | -1816.05157                  | -1817.665498                 | -1816.032444                 | -1817.674965                 | 25.36                |
| 46           | -1893.379118                 | -1894.989268                 | -1893.361671                 | -1894.998775                 | 20.85                |
| 48           | -1970.706868                 | -1972.313014                 | -1970.690097                 | -1972.322578                 | 18.92                |
| 50           | -2048.033934                 | -2049.636824                 | -2048.015663                 | -2049.646352                 | 22.95                |
| 52           | -2125.361033                 | -2126.960565                 | -2125.343643                 | -2126.970147                 | 20.50                |
| 54           | -2202.68768                  | -2204.284323                 | -2202.67131                  | -2204.293923                 | 17.77                |
| 56           | -2280.014217                 | -2281.608116                 | -2279.996219                 | -2281.617705                 | 22.08                |
| 58           | -2357.340529                 | -2358.931857                 | -2357.323516                 | -2358.941465                 | 19.44                |
| 60           | -2434.666586                 | -2436.255619                 | -2434.64803                  | -2436.265226                 | 23.50                |
| 62           | -2511.992588                 | -2513.579372                 | -2511.975002                 | -2513.588987                 | 20.93                |
| 64           | -2589.318336                 | -2590.903094                 | -2589.301604                 | -2590.912738                 | 18.61                |
| 66           | -2666.644098                 | -2668.226818                 | -2666.628013                 | -2668.236479                 | 16.87                |

**Table S31:** The aromatic stabilisation energy for the closed-shell neutral annulenes (CAM-B3LYP/6-31G(d)). The geometries were optimised using the IOP(2/15=4,2/16=2) keyword ensuring planarity. As a result, some structures may have one or more imaginary frequencies.

| Singlet (0) | A                    | B                    | C                    | D                    | ASE                  |
|-------------|----------------------|----------------------|----------------------|----------------------|----------------------|
| <i>N</i>    | EE+ZPEC<br>(Hartree) | EE+ZPEC<br>(Hartree) | EE+ZPEC<br>(Hartree) | EE+ZPEC<br>(Hartree) | (C+D)-(A+B) (kJ/mol) |
| 12          | -579.184459          | -580.381995          | -579.190851          | -580.383566          | -20.91               |
| 14          | -656.617439          | -657.783408          | -656.60434           | -657.78551           | 28.87                |
| 16          | -733.894614          | -735.077439          | -733.89396           | -735.082073          | -10.45               |
| 18          | -811.290257          | -812.451885          | -811.277601          | -812.459648          | 12.85                |
| 20          | -888.568999          | -889.745547          | -888.565037          | -889.751467          | -5.14                |
| 22          | -965.938895          | -967.101288          | -965.927714          | -967.110106          | 6.20                 |
| 24          | -1043.260949         | -1044.42571          | -1043.252684         | -1044.435            | -2.69                |
| 26          | -1120.587249         | -1121.750119         | -1120.576982         | -1121.759299         | 2.85                 |
| 28          | -1197.910126         | -1199.073855         | -1197.901228         | -1199.083238         | -1.27                |
| 30          | -1275.235361         | -1276.398572         | -1275.225767         | -1276.407681         | 1.27                 |
| 32          | -1352.558865         | -1353.721738         | -1352.549429         | -1353.731217         | -0.11                |
| 34          | -1429.883508         | -1431.046404         | -1429.873834         | -1431.055643         | 1.14                 |
| 36          | -1507.207191         | -1508.370181         | -1507.197788         | -1508.379594         | -0.03                |
| 38          | -1584.531395         | -1585.694133         | -1584.521733         | -1585.703441         | 0.93                 |
| 40          | -1661.855167         | -1663.017886         | -1661.845622         | -1663.027325         | 0.28                 |
| 42          | -1739.179126         | -1740.341643         | -1739.16947          | -1740.351121         | 0.47                 |
| 44          | -1816.502991         | -1817.665498         | -1816.493371         | -1817.674965         | 0.40                 |
| 46          | -1893.82687          | -1894.989268         | -1893.817179         | -1894.998775         | 0.48                 |
| 48          | -1971.150684         | -1972.313014         | -1971.140998         | -1972.322578         | 0.32                 |
| 50          | -2048.474565         | -2049.636824         | -2048.464833         | -2049.646352         | 0.54                 |
| 52          | -2125.798362         | -2126.960565         | -2125.788643         | -2126.970147         | 0.36                 |
| 54          | -2203.122168         | -2204.284323         | -2203.112436         | -2204.293923         | 0.35                 |
| 56          | -2280.445988         | -2281.608116         | -2280.436236         | -2281.617705         | 0.43                 |
| 58          | -2357.769772         | -2358.931857         | -2357.760014         | -2358.941465         | 0.39                 |
| 60          | -2435.093592         | -2436.255619         | -2435.083804         | -2436.265226         | 0.48                 |
| 62          | -2512.417347         | -2513.579372         | -2512.407568         | -2513.588987         | 0.43                 |
| 64          | -2589.741119         | -2590.903094         | -2589.731336         | -2590.912738         | 0.36                 |
| 66          | -2667.064884         | -2668.226818         | -2667.055094         | -2668.236479         | 0.34                 |

**Table S32:** The aromatic stabilisation energy for the closed-shell dicationic annulenes (CAM-B3LYP/6-31G(d)). The geometries were optimised using the IOp(2/15=4,2/16=2) keyword ensuring planarity. As a result, some structures may have one or more imaginary frequencies.

| Singlet (2+) | A                    | B                    | C                    | D                    | ASE                  |
|--------------|----------------------|----------------------|----------------------|----------------------|----------------------|
| <i>N</i>     | EE+ZPEC<br>(Hartree) | EE+ZPEC<br>(Hartree) | EE+ZPEC<br>(Hartree) | EE+ZPEC<br>(Hartree) | (C+D)-(A+B) (kJ/mol) |
| 12           | -578.574667          | -579.706439          | -578.55217           | -579.751012          | -57.96               |
| 14           | -655.997815          | -657.135759          | -655.997228          | -657.182633          | -121.53              |
| 16           | -733.326729          | -734.449857          | -733.303873          | -734.497438          | -64.92               |
| 18           | -810.718429          | -811.858189          | -810.709079          | -811.893282          | -67.59               |
| 20           | -888.030945          | -889.152661          | -888.010577          | -889.201582          | -74.97               |
| 22           | -965.400476          | -966.534088          | -965.38566           | -966.580935          | -84.10               |
| 24           | -1042.743749         | -1043.874739         | -1042.723381         | -1043.915495         | -53.53               |
| 26           | -1120.074343         | -1121.213711         | -1120.058427         | -1121.253034         | -61.46               |
| 28           | -1197.411428         | -1198.541436         | -1197.390815         | -1198.583637         | -56.68               |
| 30           | -1274.74126          | -1275.878088         | -1274.725936         | -1275.917471         | -63.17               |
| 32           | -1352.074945         | -1353.204431         | -1352.053936         | -1353.24714          | -56.97               |
| 34           | -1429.40457          | -1430.539384         | -1429.387433         | -1430.579504         | -60.34               |
| 36           | -1506.736306         | -1507.872314         | -1506.718684         | -1507.908958         | -49.94               |
| 38           | -1584.064732         | -1585.198405         | -1584.046154         | -1585.238665         | -56.93               |
| 40           | -1661.39489          | -1662.530326         | -1661.376561         | -1662.567496         | -49.47               |
| 42           | -1738.722864         | -1739.861388         | -1738.706476         | -1739.896196         | -48.36               |
| 44           | -1816.051569         | -1817.186752         | -1816.032541         | -1817.223987         | -47.80               |
| 46           | -1893.379118         | -1894.516967         | -1893.361747         | -1894.552031         | -46.45               |
| 48           | -1970.70688          | -1971.84646          | -1970.690138         | -1971.87913          | -41.82               |
| 50           | -2048.033933         | -2049.171442         | -2048.015698         | -2049.206457         | -44.06               |
| 52           | -2125.361034         | -2126.500414         | -2125.343642         | -2126.53321          | -40.44               |
| 54           | -2202.687679         | -2203.828951         | -2202.671308         | -2203.859881         | -38.22               |
| 56           | -2280.014218         | -2281.153562         | -2279.996191         | -2281.18625          | -38.49               |
| 58           | -2357.340534         | -2358.481615         | -2357.323478         | -2358.51255          | -36.44               |
| 60           | -2434.666586         | -2435.806059         | -2434.647949         | -2435.83847          | -36.16               |
| 62           | -2511.992589         | -2513.133677         | -2511.974914         | -2513.164453         | -34.40               |
| 64           | -2589.318337         | -2590.460985         | -2589.301496         | -2590.490082         | -32.18               |
| 66           | -2666.644085         | -2667.788033         | -2666.627887         | -2667.8157           | -30.11               |

**Table S33:** The aromatic stabilisation energy for the neutral triplet annulenes (UCAM-B3LYP/6-31G(d)). The geometries were optimised using the IOp(2/15=4,2/16=2) keyword ensuring planarity. As a result, some structures may have one or more imaginary frequencies.

| Triplet (0) | A                    | B                    | C                    | D                    | ASE                  |
|-------------|----------------------|----------------------|----------------------|----------------------|----------------------|
| N           | EE+ZPEC<br>(Hartree) | EE+ZPEC<br>(Hartree) | EE+ZPEC<br>(Hartree) | EE+ZPEC<br>(Hartree) | (C+D)-(A+B) (kJ/mol) |
| 12          | -579.170093          | -580.300612          | -579.163501          | -580.350786          | -114.42              |
| 14          | -656.583855          | -657.730732          | -656.582097          | -657.759778          | -71.64               |
| 16          | -733.880073          | -735.003423          | -733.873679          | -735.057324          | -124.73              |
| 18          | -811.266698          | -812.422764          | -811.262288          | -812.439464          | -32.27               |
| 20          | -888.554432          | -889.673923          | -888.550411          | -889.733152          | -144.95              |
| 22          | -965.922922          | -967.076311          | -965.916203          | -967.096992          | -36.66               |
| 24          | -1043.251103         | -1044.404306         | -1043.242876         | -1044.423045         | -27.60               |
| 26          | -1120.57666          | -1121.731902         | -1120.569024         | -1121.750024         | -27.53               |
| 28          | -1197.903326         | -1199.055411         | -1197.894655         | -1199.075295         | -29.44               |
| 30          | -1275.22883          | -1276.382862         | -1275.220932         | -1276.401487         | -28.16               |
| 32          | -1352.554867         | -1353.705978         | -1352.545727         | -1353.726676         | -30.35               |
| 34          | -1429.880235         | -1431.032956         | -1429.871659         | -1431.052541         | -28.90               |
| 36          | -1507.205671         | -1508.359036         | -1507.1971           | -1508.377623         | -26.30               |
| 38          | -1584.5311           | -1585.682863         | -1584.522027         | -1585.703129         | -29.39               |
| 40          | -1661.856247         | -1663.008682         | -1661.847307         | -1663.028084         | -27.47               |
| 42          | -1739.181271         | -1740.334346         | -1739.172539         | -1740.353105         | -26.33               |
| 44          | -1816.506573         | -1817.658308         | -1816.497309         | -1817.67824          | -28.01               |
| 46          | -1893.831489         | -1894.983771         | -1893.822423         | -1895.003191         | -27.18               |
| 48          | -1971.156402         | -1972.309169         | -1971.147492         | -1972.327983         | -26.00               |
| 50          | -2048.481494         | -2049.633434         | -2048.472184         | -2049.653081         | -27.14               |
| 52          | -2125.805562         | -2126.958727         | -2125.797209         | -2126.977831         | -28.23               |
| 54          | -2203.131226         | -2204.283916         | -2203.1222           | -2204.302693         | -25.60               |
| 56          | -2280.456194         | -2281.608572         | -2280.446833         | -2281.62758          | -25.33               |
| 58          | -2357.780998         | -2358.933708         | -2357.771784         | -2358.952382         | -24.84               |
| 60          | -2435.105925         | -2436.258259         | -2435.096411         | -2436.277204         | -24.76               |
| 62          | -2512.430715         | -2513.583361         | -2512.42132          | -2513.60199          | -24.24               |
| 64          | -2589.755432         | -2590.90837          | -2589.746205         | -2590.926714         | -23.94               |
| 66          | -2667.079854         | -2668.233342         | -2667.071087         | -2668.251456         | -24.54               |

**Table S34:** The aromatic stabilisation energy for the triplet dicationic annulenes (UCAM-B3LYP/6-31G(d)). The geometries were optimised using the IOp(2/15=4,2/16=2) keyword ensuring planarity. As a result, some structures may have one or more imaginary frequencies.

| Triplet (2+) | A                    | B                    | C                    | D                    | ASE                  |
|--------------|----------------------|----------------------|----------------------|----------------------|----------------------|
| <i>N</i>     | EE+ZPEC<br>(Hartree) | EE+ZPEC<br>(Hartree) | EE+ZPEC<br>(Hartree) | EE+ZPEC<br>(Hartree) | (C+D)-(A+B) (kJ/mol) |
| 12           | -578.532306          | -579.736043          | -578.540344          | -579.729511          | -3.95                |
| 14           | -655.989086          | -657.168141          | -655.976565          | -657.16551           | 39.78                |
| 16           | -733.291457          | -734.482834          | -733.293397          | -734.48215           | -3.30                |
| 18           | -810.710965          | -811.874037          | -810.694299          | -811.885013          | 14.94                |
| 20           | -888.005426          | -889.188929          | -888.002425          | -889.190338          | 4.18                 |
| 22           | -965.392065          | -966.55425           | -965.37689           | -966.559266          | 26.67                |
| 24           | -1042.726395         | -1043.889859         | -1042.716065         | -1043.899766         | 1.11                 |
| 26           | -1120.065452         | -1121.224818         | -1120.051858         | -1121.237054         | 3.57                 |
| 28           | -1197.399285         | -1198.560745         | -1197.387222         | -1198.570336         | 6.49                 |
| 30           | -1274.735029         | -1275.894059         | -1274.721693         | -1275.905877         | 3.99                 |
| 32           | -1352.066542         | -1353.22679          | -1352.053512         | -1353.236224         | 9.44                 |
| 34           | -1429.400092         | -1430.559195         | -1429.386732         | -1430.570349         | 5.79                 |
| 36           | -1506.730979         | -1507.889234         | -1506.718245         | -1507.902607         | -1.68                |
| 38           | -1584.062251         | -1585.221055         | -1584.048555         | -1585.231744         | 7.89                 |
| 40           | -1661.392395         | -1662.55048          | -1661.379152         | -1662.562913         | 2.13                 |
| 42           | -1738.722064         | -1739.879404         | -1738.70909          | -1739.893167         | -2.07                |
| 44           | -1816.051465         | -1817.209383         | -1816.037886         | -1817.221147         | 4.77                 |
| 46           | -1893.380533         | -1894.537937         | -1893.367217         | -1894.550807         | 1.17                 |
| 48           | -1970.708735         | -1971.865684         | -1970.695803         | -1971.879783         | -3.06                |
| 50           | -2048.036976         | -2049.194754         | -2048.023807         | -2049.206951         | 2.55                 |
| 52           | -2125.365124         | -2126.522199         | -2125.351893         | -2126.535428         | 0.01                 |
| 54           | -2202.69274          | -2203.849436         | -2202.679857         | -2203.863493         | -3.08                |
| 56           | -2280.020306         | -2281.17746          | -2280.00682          | -2281.190028         | 2.41                 |
| 58           | -2357.347088         | -2358.504487         | -2357.334642         | -2358.517781         | -2.23                |
| 60           | -2434.674147         | -2435.831716         | -2434.660844         | -2435.843778         | 3.26                 |
| 62           | -2512.000875         | -2513.158587         | -2511.988641         | -2513.171283         | -1.21                |
| 64           | -2589.327586         | -2590.485004         | -2589.31461          | -2590.498366         | -1.01                |
| 66           | -2666.654038         | -2667.811307         | -2666.641968         | -2667.825185         | -4.75                |

## GIMIC results

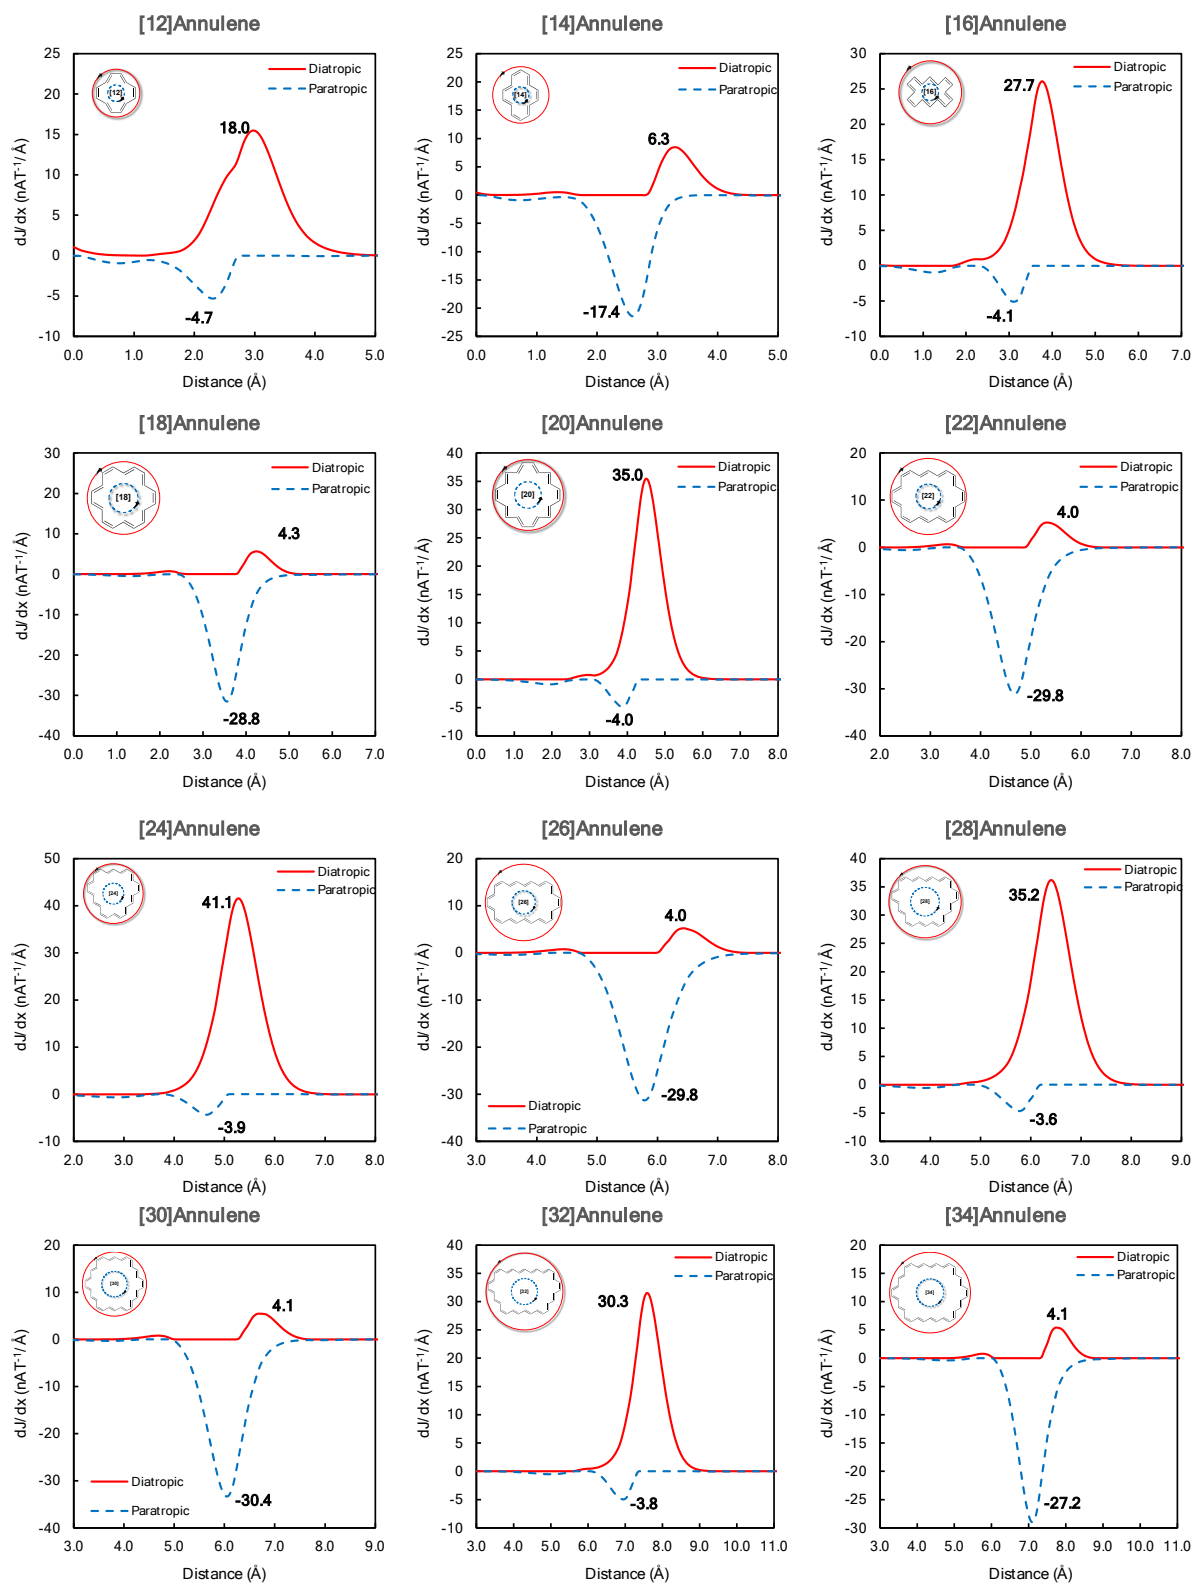



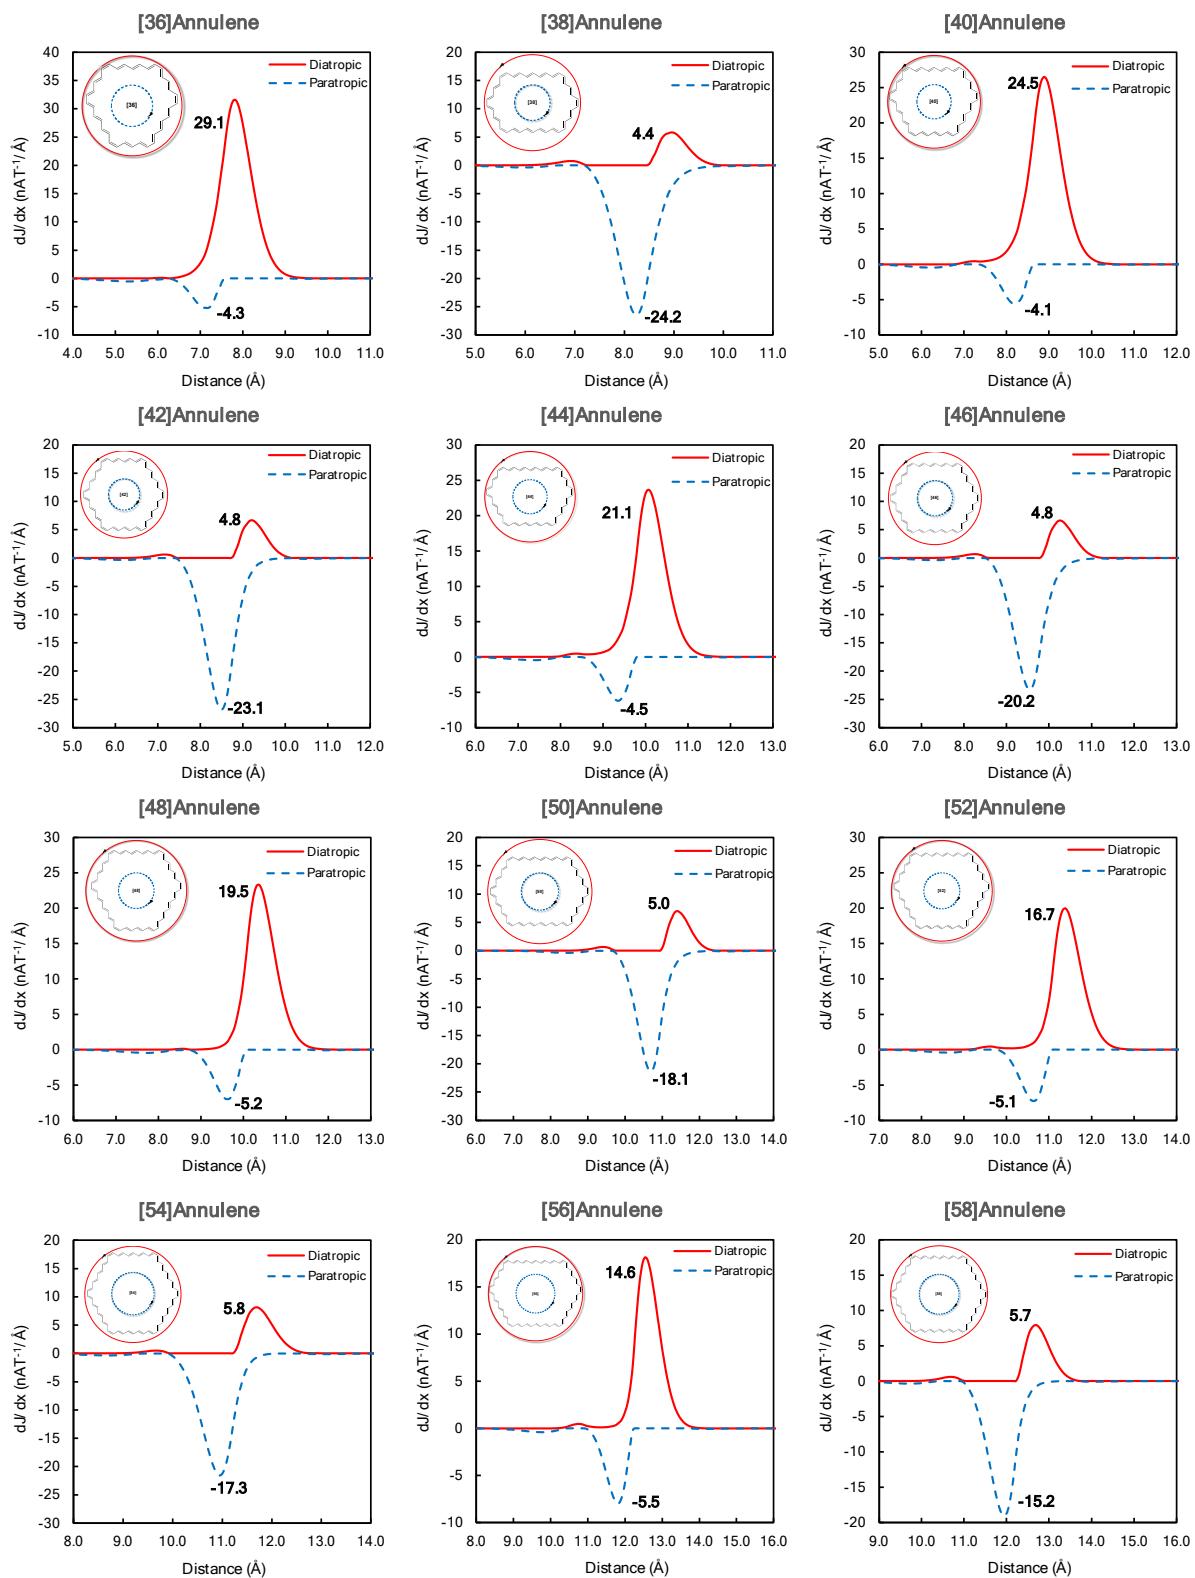

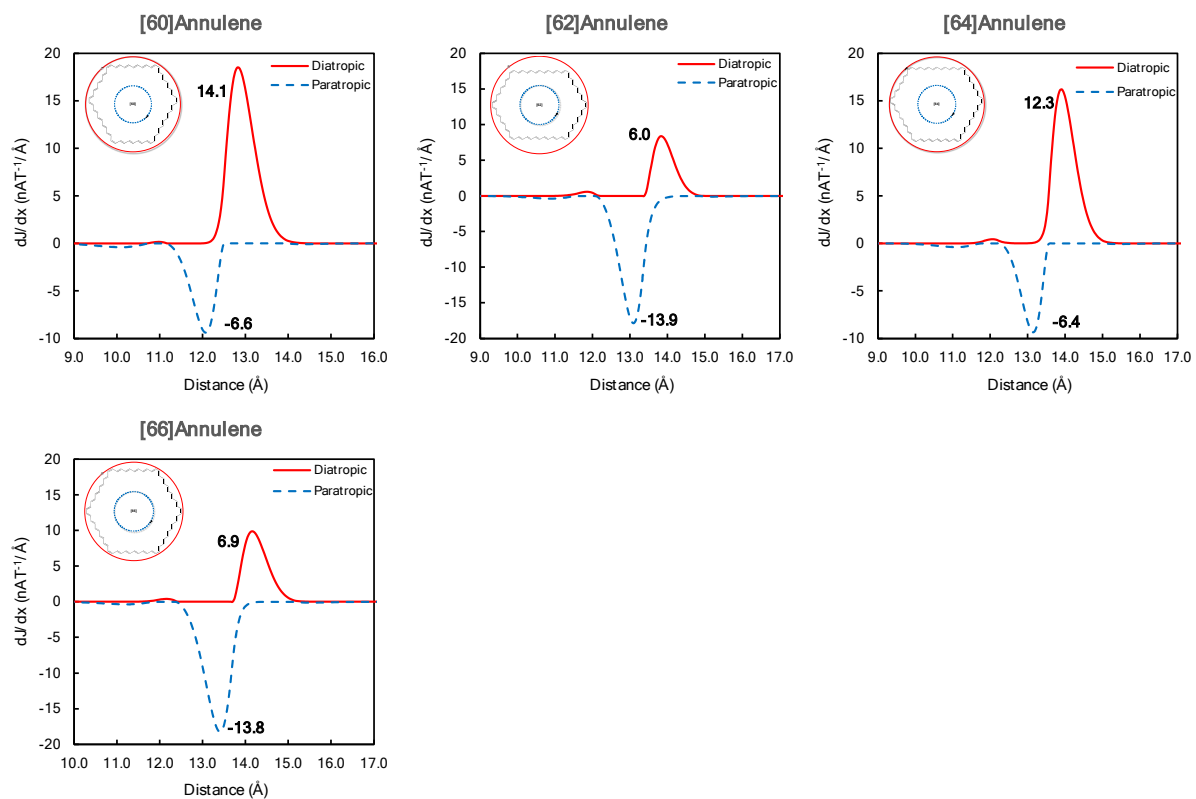

**Figure S32:** Profiles of current strength for the neutral triplet  $[N]$ annulenes through a plane situated halfway between two consecutive atoms and extending from the center of the molecule to a region where the current density vanishes planes. The numerical integration of the ring current strength was conducted using the GIMIC programme at the B3LYP/6-31G(d) level of theory. The positive and negative values represent the sum of the diatropic and paratropic contributions, which is determined through the subdivided slices of the integration plane.

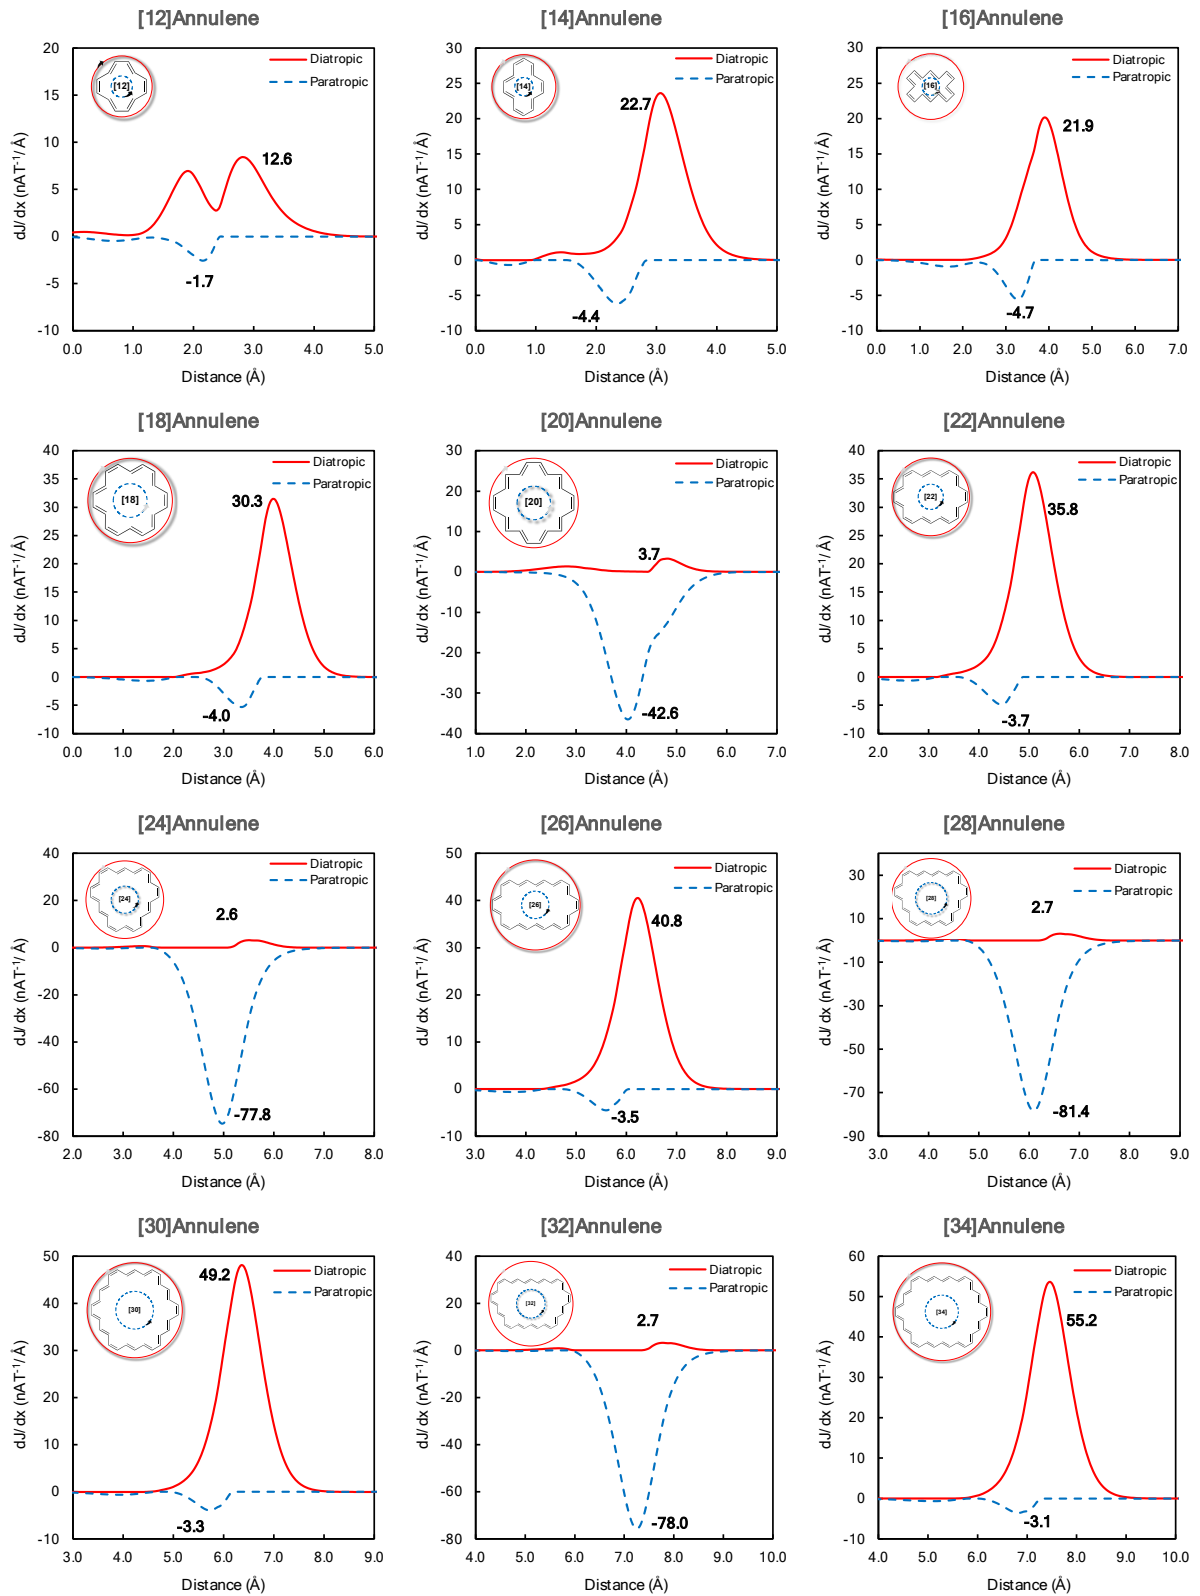

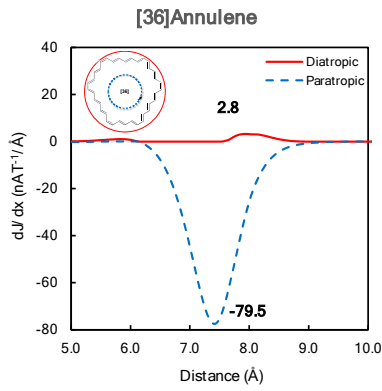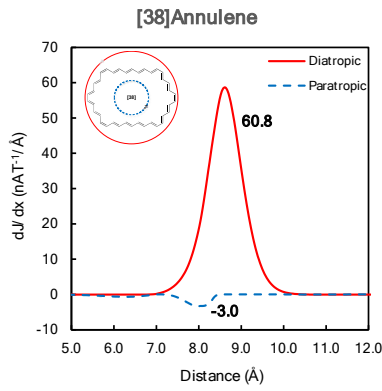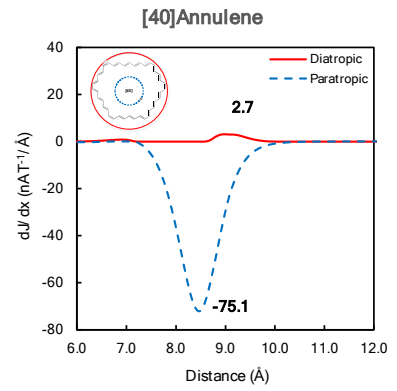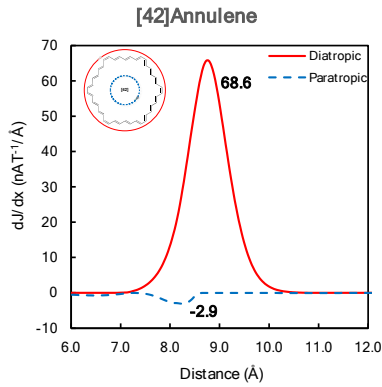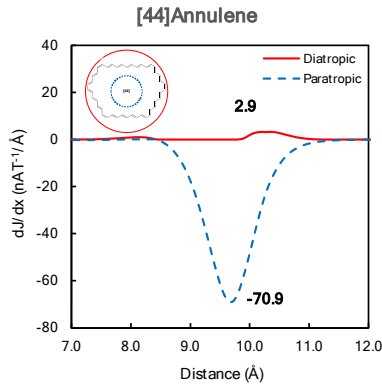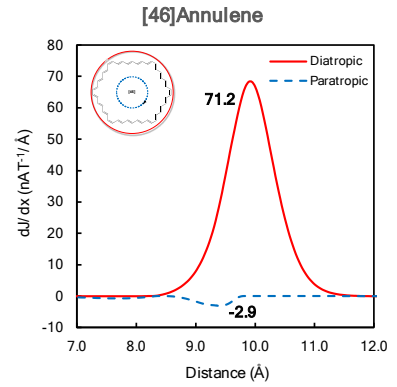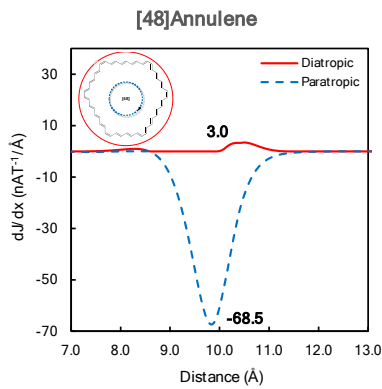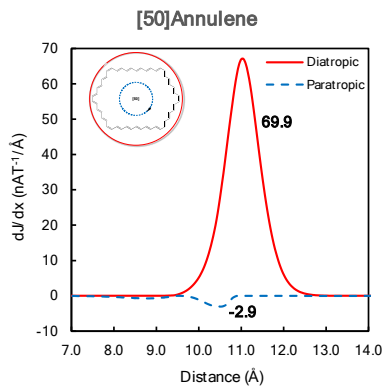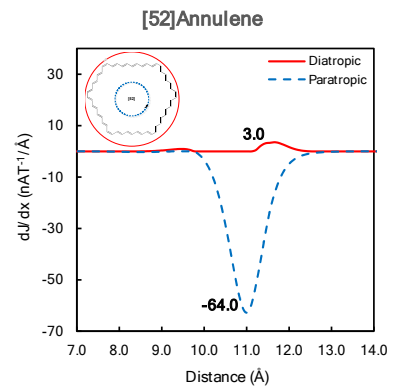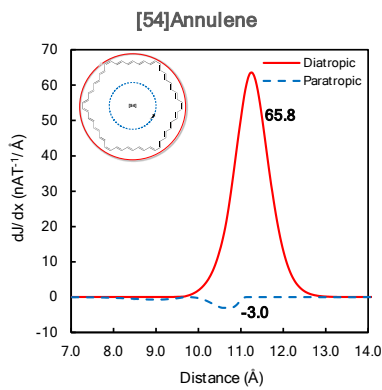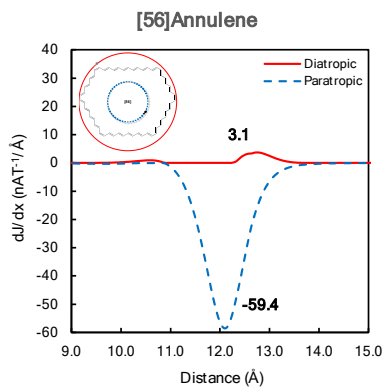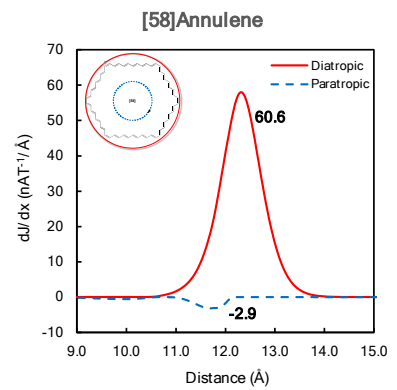

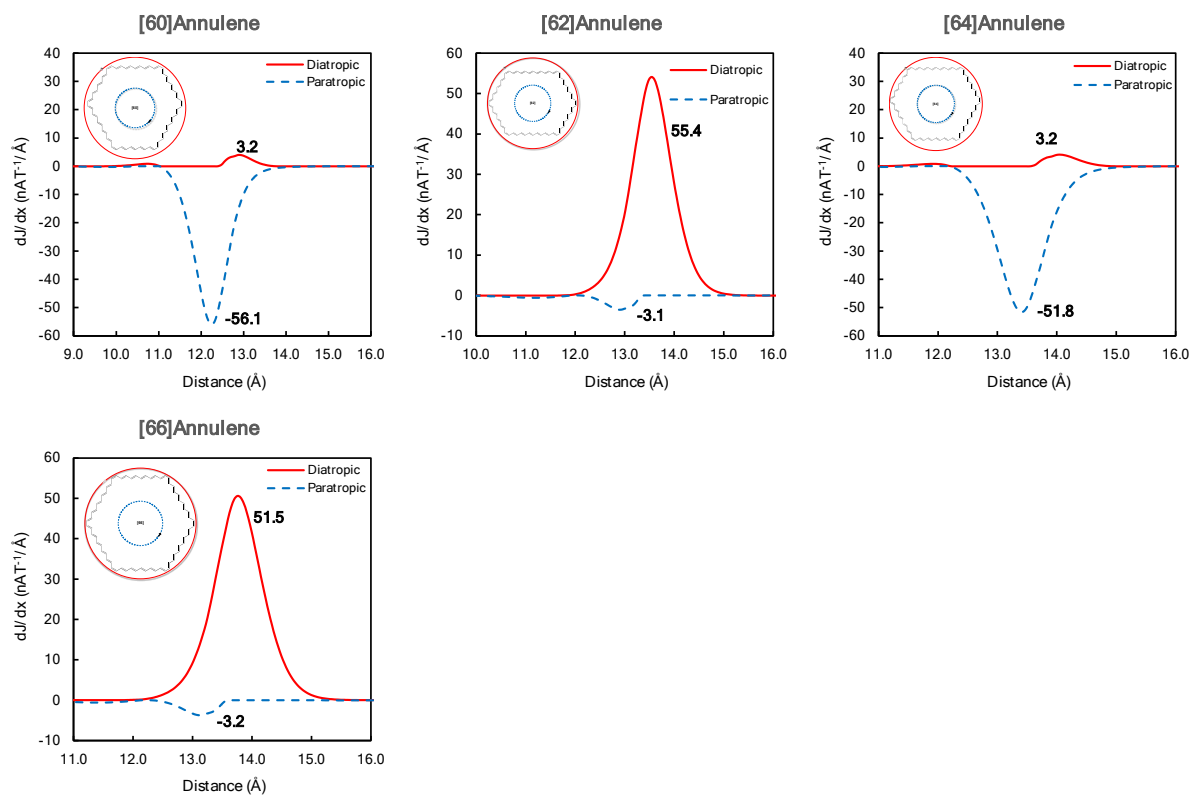

**Figure S33:** Profiles of current strength for the neutral triplet dicationic  $[N]$ annulenes through a plane situated halfway between two consecutive atoms and extending from the center of the molecule to a region where the current density vanishes planes. The numerical integration of the ring current strength was conducted using the GIMIC programme at the B3LYP/6-31G(d) level of theory. The positive and negative values represent the sum of the diatropic and paratropic contributions, which is determined through the subdivided slices of the integration plane.

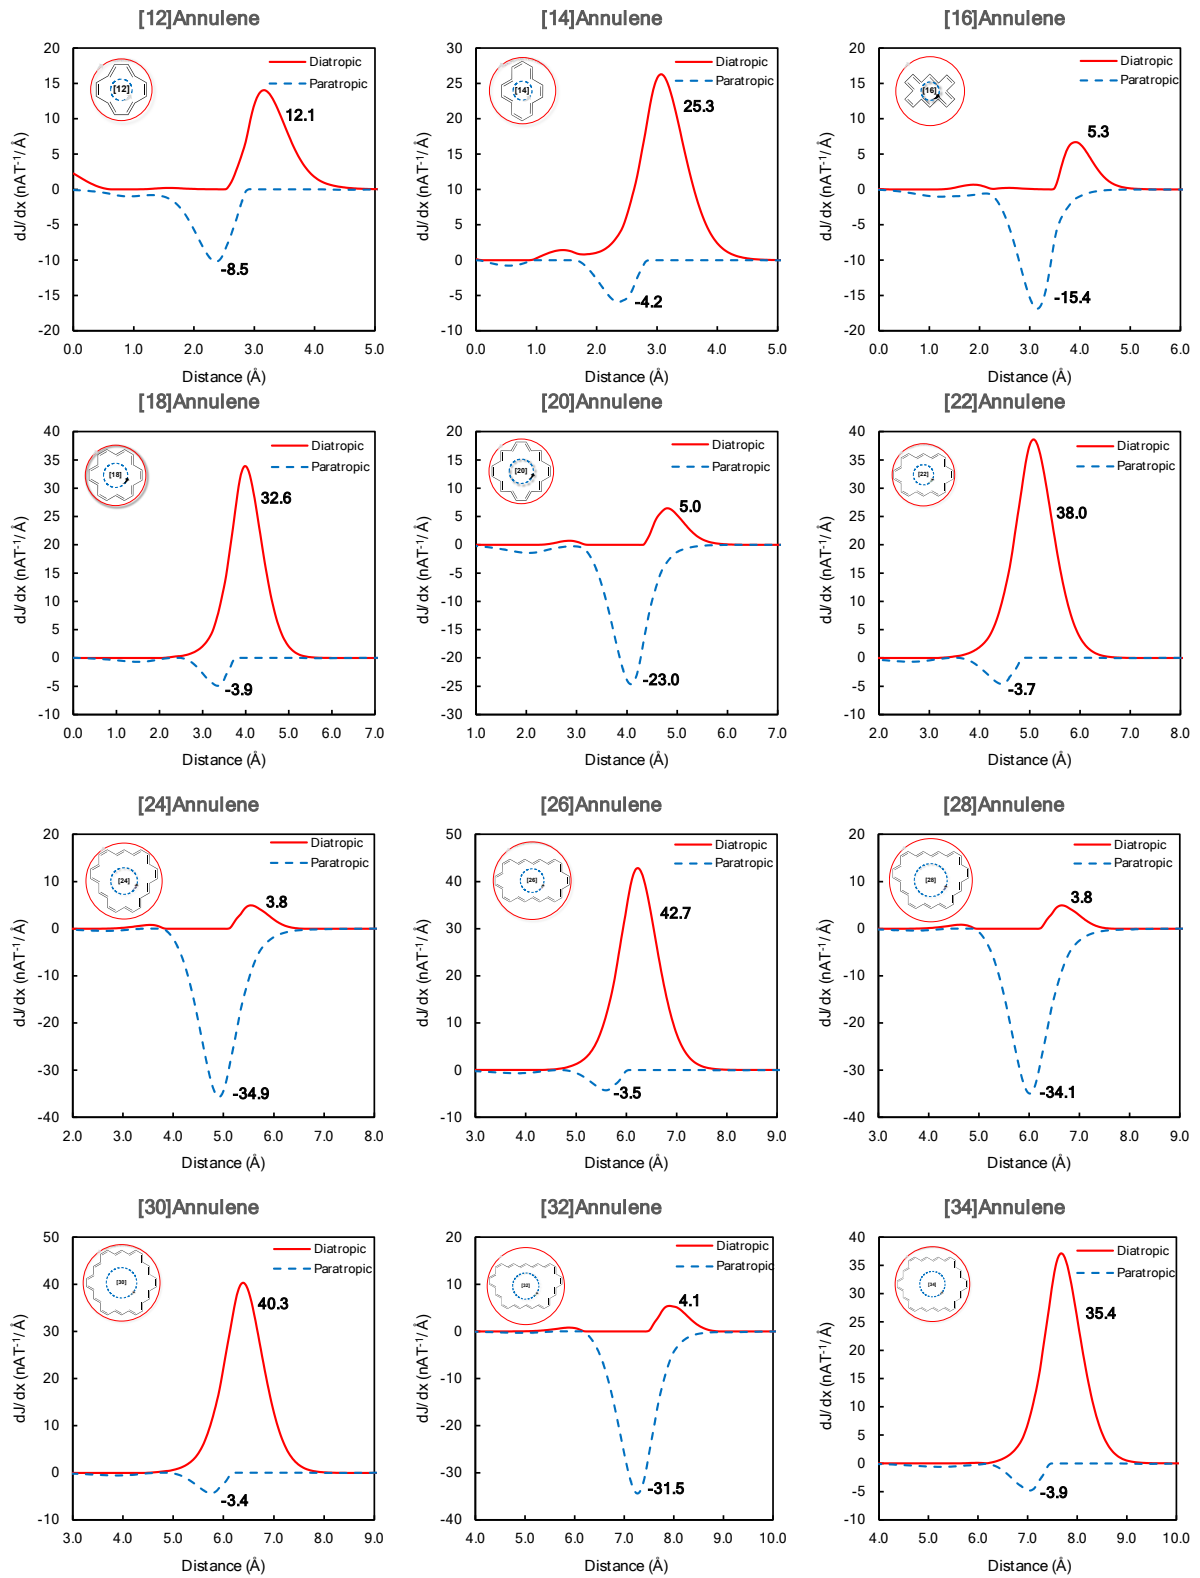

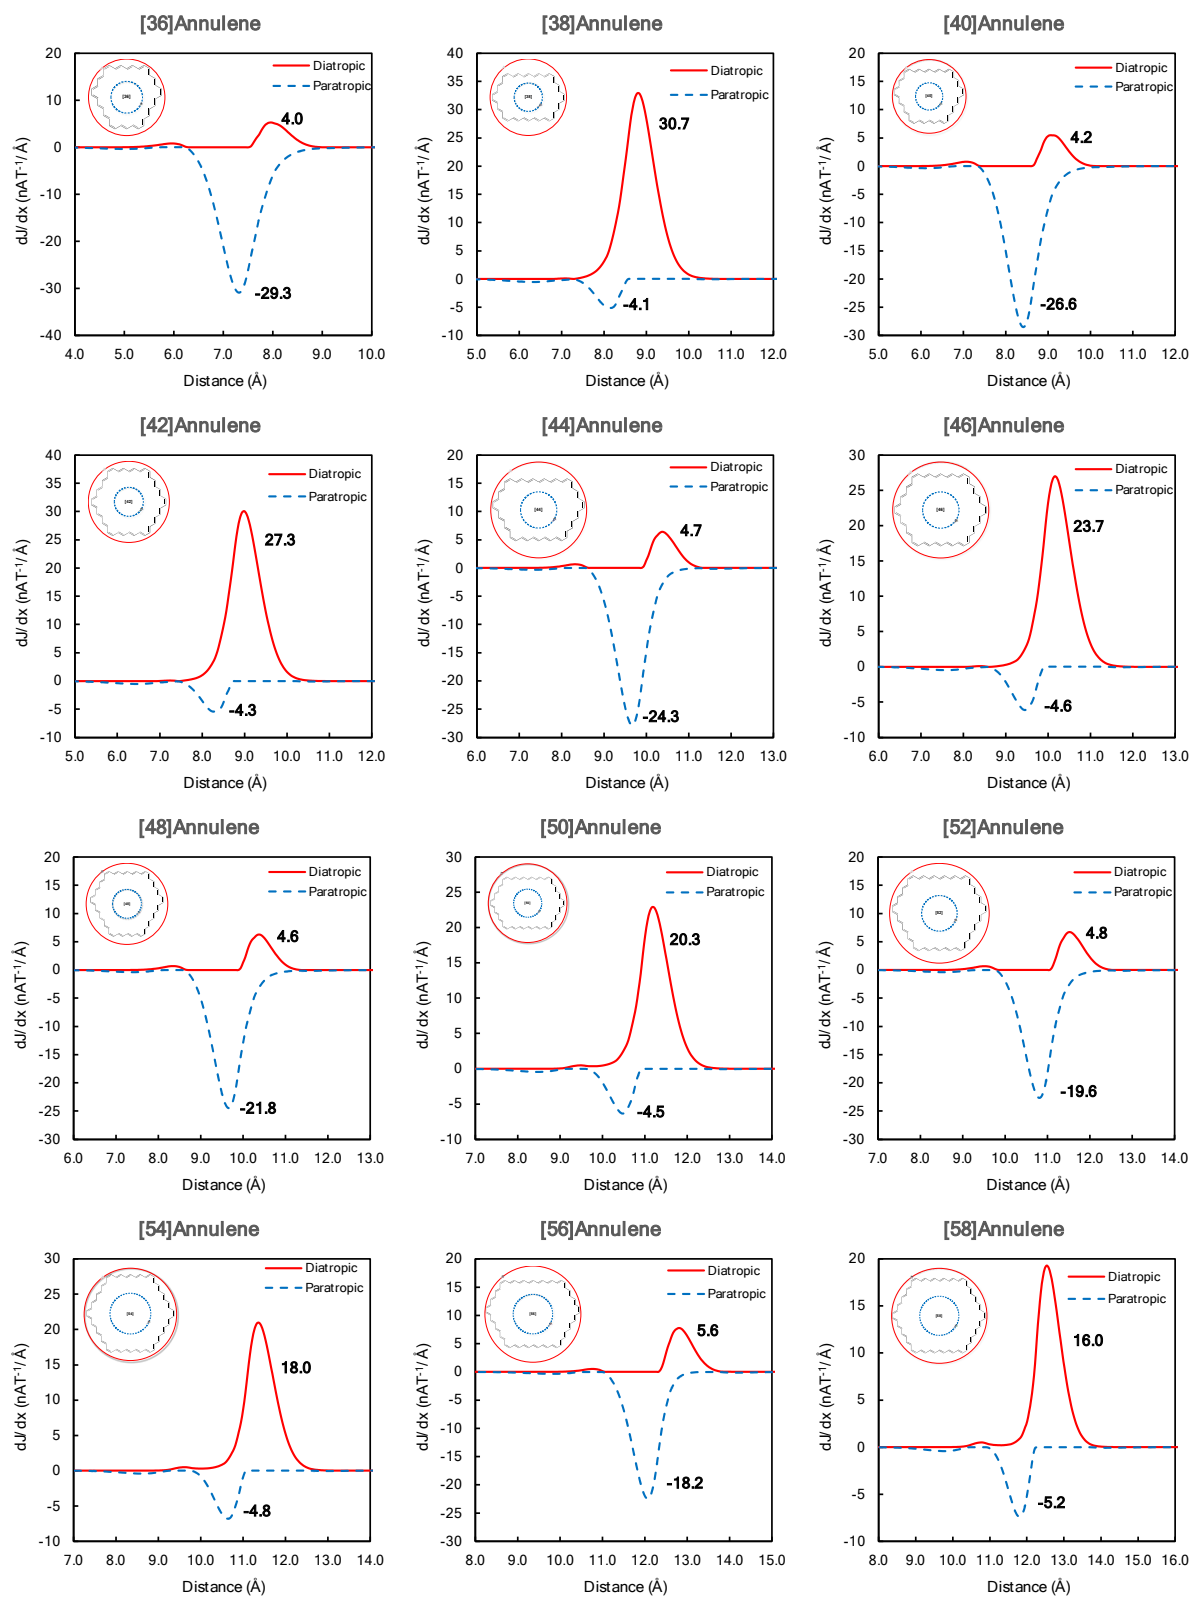

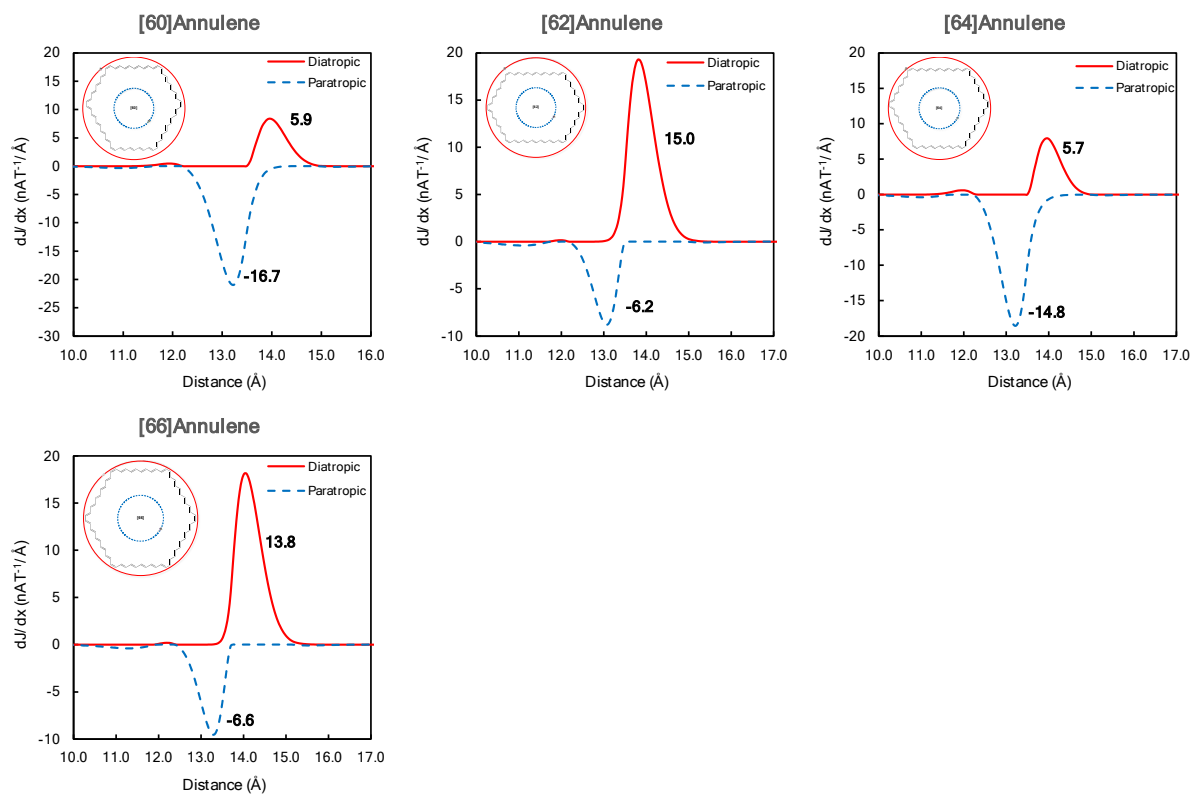

**Figure S34:** Profiles of current strength for the neutral singlet  $[N]$ annulenes through a plane situated halfway between two consecutive atoms and extending from the center of the molecule to a region where the current density vanishes planes. The numerical integration of the ring current strength was conducted using the GIMIC programme at the B3LYP/6-31G(d) level of theory. The positive and negative values represent the sum of the diatropic and paratropic contributions, which is determined through the subdivided slices of the integration plane.



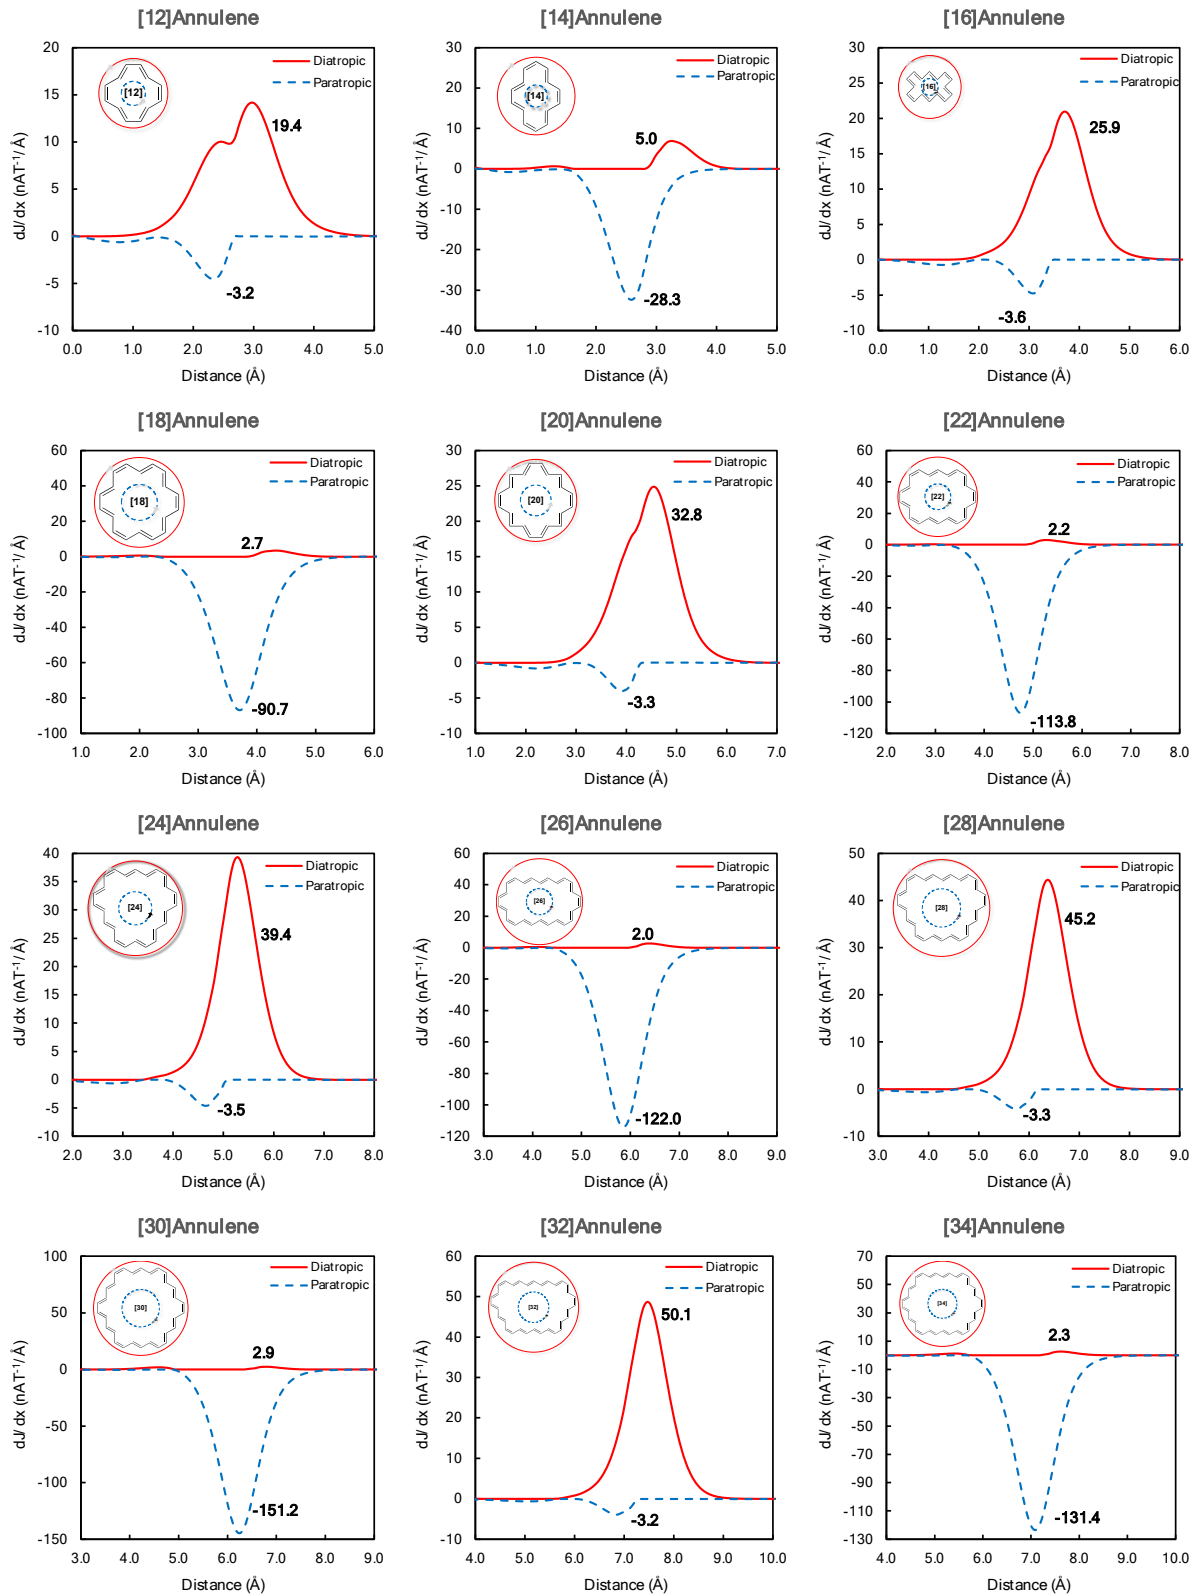

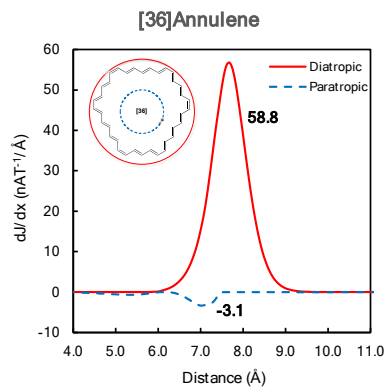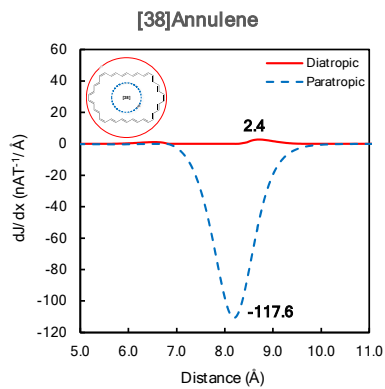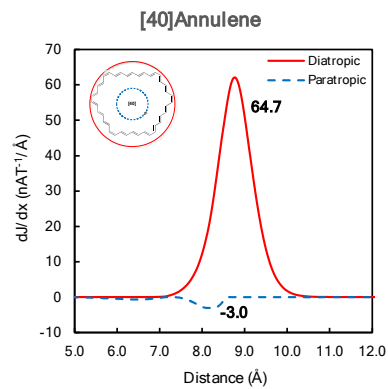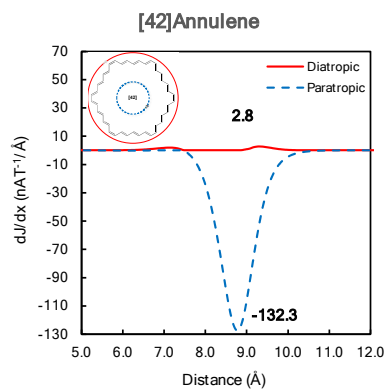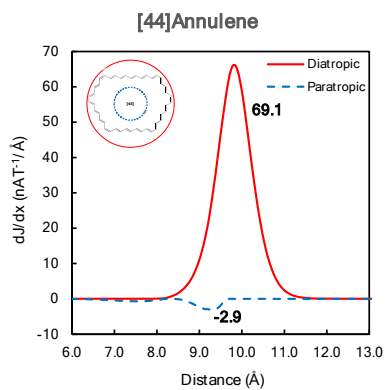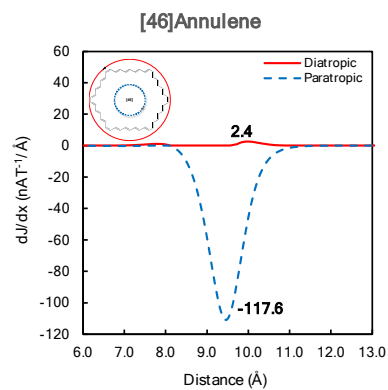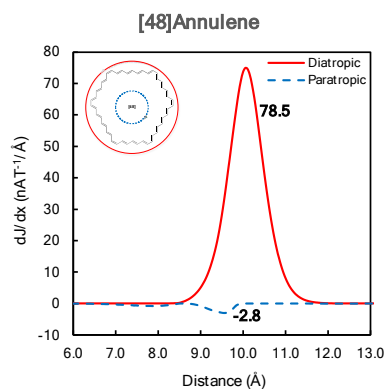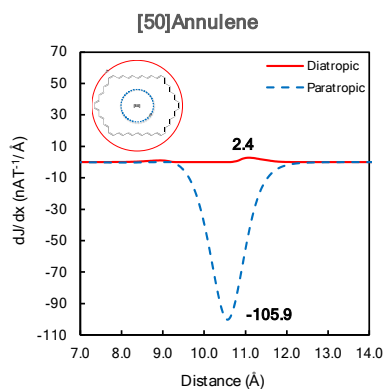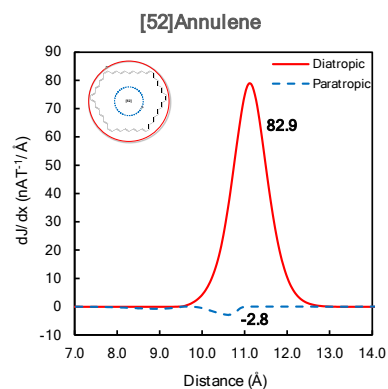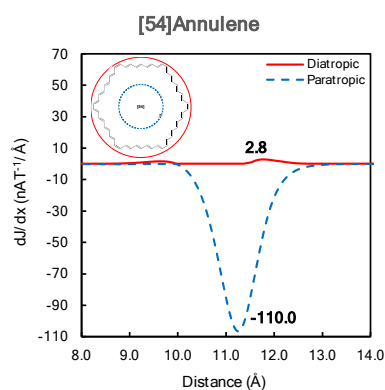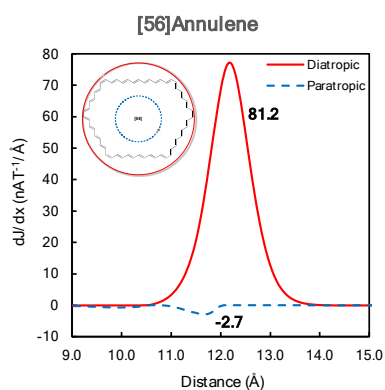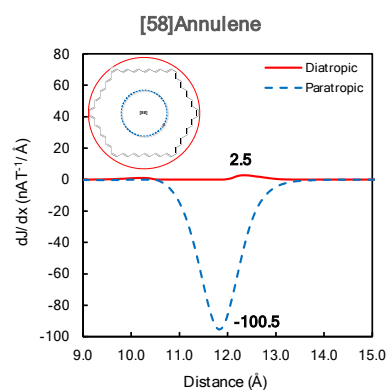

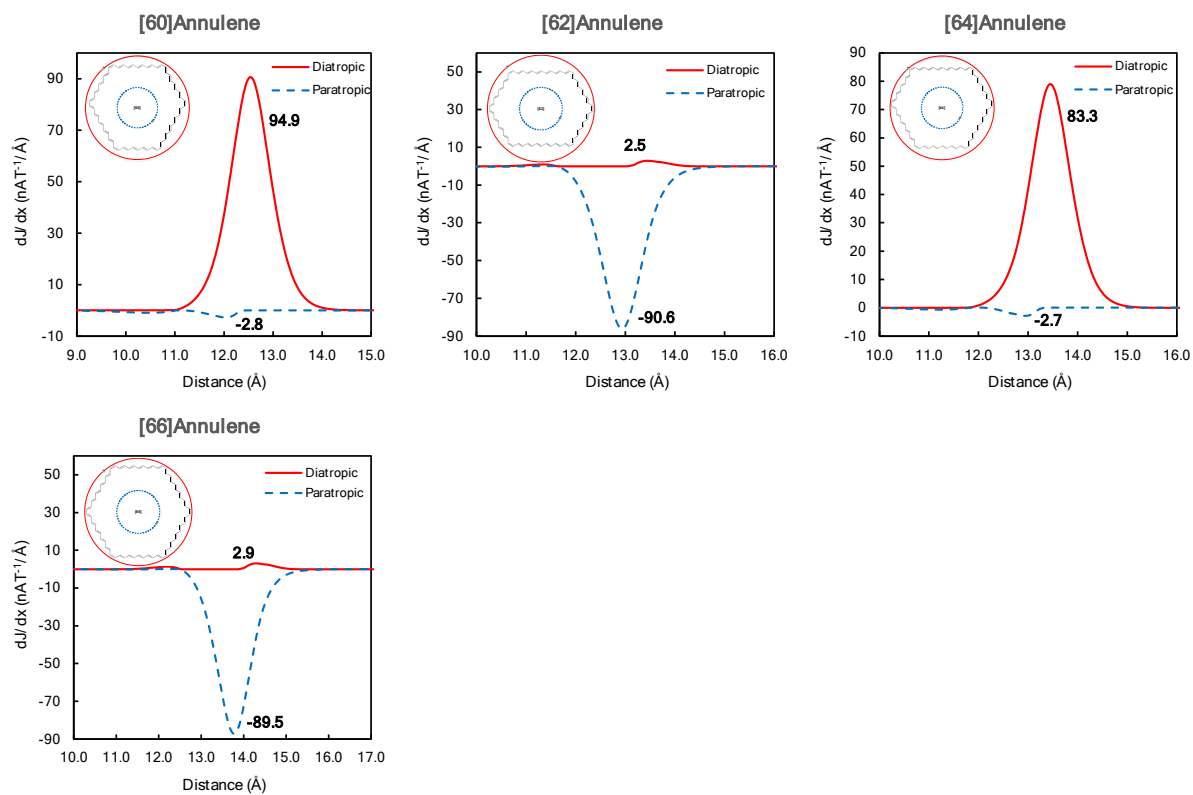

**Figure S35:** Profiles of current strength for the singlet dicationic  $[N]$ annulenes through a plane situated halfway between two consecutive atoms and extending from the center of the molecule to a region where the current density vanishes planes. The numerical integration of the ring current strength was conducted using the GIMIC programme at the B3LYP/6-31G(d) level of theory. The positive and negative values represent the sum of the diatropic and paratropic contributions, which is determined through the subdivided slices of the integration plane.

## Correlation Analysis

**A** B3LYP      Structural      Electronic      Magnetic      Reactivity Energetic

| R <sup>2</sup>        | HOMA | BLA  | FLU  | BOA  | AV1245 | AV <sub>min</sub> | GIMIC | NICS(1) <sub>zz</sub> | Δη   | ASE  |
|-----------------------|------|------|------|------|--------|-------------------|-------|-----------------------|------|------|
| HOMA                  | 1.00 |      |      |      |        |                   |       |                       |      |      |
| BLA                   | 0.77 | 1.00 |      |      |        |                   |       |                       |      |      |
| FLU                   | 0.94 | 0.90 | 1.00 |      |        |                   |       |                       |      |      |
| BOA                   | 0.73 | 0.99 | 0.87 | 1.00 |        |                   |       |                       |      |      |
| AV1245                | 0.27 | 0.05 | 0.13 | 0.04 | 1.00   |                   |       |                       |      |      |
| AV <sub>min</sub>     | 0.29 | 0.11 | 0.17 | 0.09 | 0.86   | 1.00              |       |                       |      |      |
| GIMIC                 | 0.06 | 0.15 | 0.07 | 0.15 | 0.02   | 0.15              | 1.00  |                       |      |      |
| NICS(1) <sub>zz</sub> | 0.10 | 0.19 | 0.12 | 0.20 | 0.04   | 0.19              | 0.89  | 1.00                  |      |      |
| Δη                    | 0.36 | 0.48 | 0.42 | 0.51 | 0.05   | 0.20              | 0.36  | 0.47                  | 1.00 |      |
| ASE                   | 0.27 | 0.47 | 0.35 | 0.50 | 0.03   | 0.16              | 0.24  | 0.34                  | 0.76 | 1.00 |

**B** CAM-B3LYP      Structural      Electronic      Magnetic      Reactivity Energetic

| R <sup>2</sup>        | HOMA | BLA  | FLU  | BOA  | AV1245 | AV <sub>min</sub> | GIMIC | NICS(1) <sub>zz</sub> | Δη   | ASE  |
|-----------------------|------|------|------|------|--------|-------------------|-------|-----------------------|------|------|
| HOMA                  | 1.00 |      |      |      |        |                   |       |                       |      |      |
| BLA                   | 0.91 | 1.00 |      |      |        |                   |       |                       |      |      |
| FLU                   | 0.98 | 0.96 | 1.00 |      |        |                   |       |                       |      |      |
| BOA                   | 0.87 | 1.00 | 0.94 | 1.00 |        |                   |       |                       |      |      |
| AV1245                | 0.22 | 0.08 | 0.14 | 0.05 | 1.00   |                   |       |                       |      |      |
| AV <sub>min</sub>     | 0.04 | 0.00 | 0.01 | 0.00 | 0.49   | 1.00              |       |                       |      |      |
| GIMIC                 | 0.09 | 0.09 | 0.09 | 0.09 | 0.00   | 0.15              | 1.00  |                       |      |      |
| NICS(1) <sub>zz</sub> | 0.11 | 0.12 | 0.11 | 0.13 | 0.00   | 0.13              | 0.89  | 1.00                  |      |      |
| Δη                    | 0.22 | 0.23 | 0.22 | 0.23 | 0.05   | 0.11              | 0.31  | 0.42                  | 1.00 |      |
| ASE                   | 0.25 | 0.34 | 0.29 | 0.35 | 0.02   | 0.05              | 0.10  | 0.17                  | 0.45 | 1.00 |

**Figure S36:** Correlation coefficients ( $R^2$ ) between the aromaticity indices rooted in distinct criteria employed in the analysis of the  $[N]$ annulenes ( $n = 112$ ) computed with (A) B3LYP and (B) CAM-B3LYP.  $R^2$  values exceeding 0.60 are indicated in green, results below 0.40 are identified in red, and outcomes between both are marked by orange colouring.



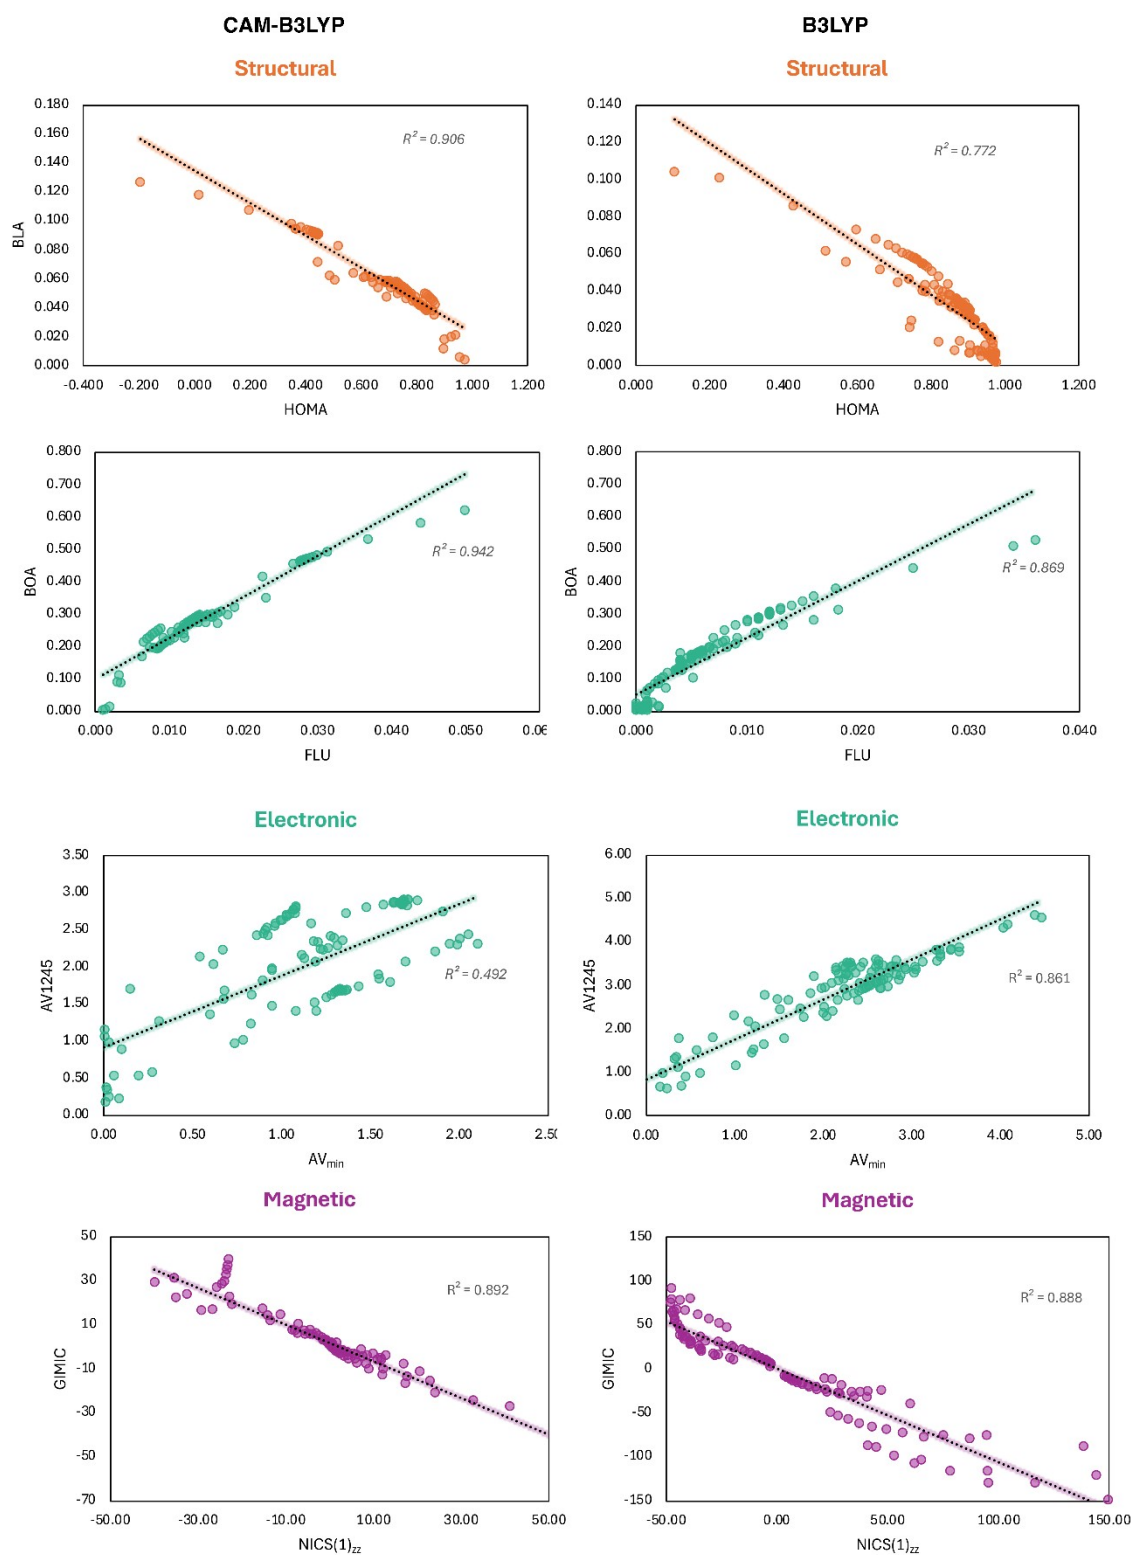

**Figure S39:** The correlation plots between selected aromaticity indices rooted in the same criteria of the neutral and charged [N]annulenes in the singlet and triplet states ( $N = 12-66$ ) computed with B3LYP and CAM-B3LYP (112 systems).

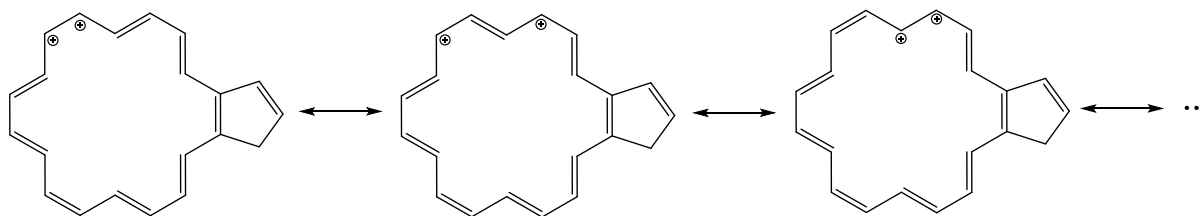

**Figure S40:** Several resonance structures for the charged species of [18] annulene.

## References

- Kruszewski, J., Krygowski, T. Definition of aromaticity basing on the harmonic oscillator model. *Tetrahedron Lett.* **1972**, *13*, 3839–3842.
- Matito, E., Duran, M., Solà, M. The aromatic fluctuation index (FLU): A new aromaticity index based on electron delocalization. *J. Chem. Phys.* **2005**, *122*, 014109.
- Szatyłowicz, H., Wierzchowicz, P.A., Krygowski, T.M. Molecular geometry as a source of electronic structure of  $\pi$ -electron systems and their physicochemical properties. *Aromaticity: Elsevier*; **2021**. p. 71-99.
- Casademont-Reig, I., Woller, T., Contreras-García, J., Alonso, M., Torrent-Sucarrat, M., Matito, E. New electron delocalization tools to describe the aromaticity in porphyrinoids. *Phys. Chem. Chem. Phys.* **2018**, *20*, 2787–2796.
- Casademont-Reig, I., Ramos-Cordoba, E., Torrent-Sucarrat, M., Matito, E. How do the Hückel and Baird rules fade away in annulenes? *Molecules* **2020**, *25*, 711.
- Casademont-Reig, I. Computational study of aromaticity in porphyrinoid systems and photosensitizers from chemical bonding descriptors. PhD thesis (Universidad del País Vasco-Euskal Herriko Unibertsitatea, **2021**).
- Matito, E. ESI-3D: electron sharing indices program for 3d molecular space partitioning; Institute of Computational Chemistry and Catalysis (IQCC). <http://iqc.udg.es/eduard/ESI> (2006).
- Bader, R., Stephens, M. Fluctuation and correlation of electrons in molecular systems. *Chem. Phys. Lett.* **1974**, *26*, 445–449.
- Poater, J., Fradera, X., Duran, M., Solà, M. The delocalization index as an electronic aromaticity criterion: application to a series of planar polycyclic aromatic hydrocarbons. *Chem. Eur. J.* **2003**, *9*, 400–406.
- Feixas, F., Matito, E., Poater, J., Solà, M. Quantifying aromaticity with electron delocalisation measures. *Chem. Soc. Rev.* **2015**, *44*, 6434–6451.
- Popelier PLA, Aicken F, O'Brien S. *Atoms in molecules*: Prentice Hall Manchester; **2000**.
- Giambiagi, M., de Giambiagi, M. S., dos Santos Silva, C. D., de Figueiredo, A. P. Multicenter bond indices as a measure of aromaticity. *Phys. Chem. Chem. Phys.* **2000**, *2*, 3381–3392.
- Matito, E. An electronic aromaticity index for large rings. *Phys. Chem. Chem. Phys.* **2016**, *18*, 11839–11846.
- Bultinck, P., Ponc, R., Van Damme, S. Multicenter bond indices as a new measure of aromaticity in polycyclic aromatic hydrocarbons. *J. Phys. Org. Chem.* **2005**, *18*, 706–718.
- Szczepanik, D. W., Andrzejak, M., Dyduch, K., Zak, E., Makowski, M., Mazur, G., Mrozek, J. A uniform approach to the description of multicenter bonding. *Phys. Chem. Chem. Phys.* **2014**, *16*, 20514–20523.
- Szczepanik, D.W., Solà, M. The electron density of delocalized bonds (EDDBs) as a measure of local and global aromaticity. *Aromaticity: Elsevier*; **2021**. pp. 259–84.
- Gershoni-Poranne, R., Stanger, A. NICS–nucleus independent chemical shift. *Aromaticity: Elsevier*; **2021**. pp.99–154.
- Fliegl, H., Taubert, S., Lehtonen, O., Sundholm, D. The gauge including magnetically induced current method. *Phys. Chem. Chem. Phys.* **2011**, *13*, 20500–20518.
- Schleyer, P. v. R., Maerker, C., Dransfeld, A., Jiao, H., van Eikema Hommes, N. J. Nucleus-independent chemical shifts: a simple and efficient aromaticity probe. *J. Am. Chem. Soc.* **1996**, *118*, 6317–6318.
- Stanger, A. NICS–past and present. *Eur. J. Org. Chem.* **2020**, 3120–3127.
- Gershoni-Poranne, R., Stanger, A. Magnetic criteria of aromaticity. *Chem. Soc. Rev.* **2015**, *44*, 6597–6615.
- Ditchfield, R. Self-consistent perturbation theory of diamagnetism: I. A gauge-invariant LCAO method for NMR chemical shifts. *Mol. Phys.* **1974**, *27*, 789–807.
- López, C.S., Faza, O.N. Overview of the computational methods to assess aromaticity. *Aromaticity: Elsevier*; **2021**. pp. 41-71.
- Dimitrova, M., Sundholm, D. Current density, current-density pathways, and molecular aromaticity. *Aromaticity: Elsevier*; **2021**. pp. 155-194.
- De Proft, F., Geerlings, P. Relative hardness as a measure of aromaticity. *Phys. Chem. Chem. Phys.* **2004**, *6*, 242–248.
- Jirásek, M., Rickhaus, M., Tejerina, L., Anderson, H. L. Experimental and theoretical evidence for aromatic stabilization energy in large macrocycles. *J. Am. Chem. Soc.* **2021**, *143*, 2403–2412.
